# Supplementary material for: Highly enantioselective organocatalytic Michael addition of nitroalkanes to 4-oxo-enoates
Source: Royal Society of Chemistry journal article supplement (doi:10.1039/b905033g), 2009-01-01

# Highly Enantioselective Organocatalytic Michael Addition of Nitroalkanes to 4-Oxo-Enoates

Hai-Hua Lu, Xu-Fan Wang, Chang-Jiang Yao, Jian-Ming Zhang, Hong Wu and Wen-Jing Xiao\*

*The Key Laboratory of Pesticide and Chemical Biology, Ministry of Education, College of Chemistry, Central  
China Normal University, 152 Luoyu Road, Wuhan, Hubei 430079, China*  
Fax: (+86)-27-67862041; E-mail: wxiao@mail.ccnu.edu.cn

## Contents

|                                                                                                                            |      |
|----------------------------------------------------------------------------------------------------------------------------|------|
| 1. General Methods                                                                                                         | S-1  |
| 2. Materials                                                                                                               | S-1  |
| 3. Experimental Procedures and Characterizations                                                                           | S-2  |
| 4. Synthesis of functionalized $\beta^2$ -amino acid derivatives                                                           | S-22 |
| 5. NMR Spectra of 4-oxo-enoates <b>1b-t</b> , $\gamma$ -keto esters <b>3</b> , <b>4</b> , <b>5</b> , <b>7</b> and <b>8</b> | S-28 |

## 1. General methods

IR was recorded on a Perkin-Elmer PE-983 infrared spectrometer with absorption in  $\text{cm}^{-1}$ . Melting points were determined on X4 type melting point apparatus and were uncorrected. Proton and carbon nuclear magnetic resonance ( $^1\text{H}$  &  $^{13}\text{C}$  NMR) spectra were recorded on Varian-Mercury 400/600 (400/600 MHz) spectrometers. Chemical shifts ( $\delta$ ) are reported in parts per million (ppm) relative to residual solvent signals ( $\text{CHCl}_3$ , 7.26 ppm for  $^1\text{H}$  NMR,  $\text{CDCl}_3$ , 77.0 ppm for  $^{13}\text{C}$  NMR). Data are reported as follows: chemical shift ( $\delta$ ), multiplicity (s = singlet, d = doublet, t = triplet, q = quartet, dd = doublet of doublets, dd = doublet of triplets, m = multiplet, brs = broad signal), coupling constants (Hz). Mass spectra were measured on a Finnigan Trace MS spectrometer. Elementary analyses were taken on a Vario EL III elementary analysis instrument. Chromatographic purification of products was accomplished using nitrogen-forced-flow chromatography according to the method of Still.<sup>1</sup> The enantiomeric excess (ee) of the products was determined by chiral stationary phase HPLC. Optical rotations were measured with JASCO P-1020 polarimeter.

## 2. Materials

Commercial reagents were purified prior to use following the guidelines of Perrin and Armarego.<sup>2</sup> Flash chromatography was conducted using 60 silica (mesh 230-400). Catalysts **V-I** were prepared according to literature procedures.<sup>3</sup>

### 3. Experimental Procedures and Characterizations

#### Step A.

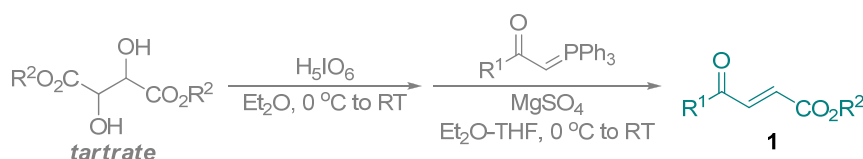

**Representative procedure for the preparation of 4-oxo-enoates.** Periodic acid dihydrate (10 mmol, 2.28 g) was added in portionwise to a stirred solution of dibenzyl tartrate (10 mmol, 3.30 g) in 20 mL of freshly distilled diethyl ether at RT. After stirred for 3 hours, the suspension was suction-filtrated and the solid was washed with 25 mL of freshly distilled tetrahydrofuran. Magnesium sulfate (3.0 g) was added to the organic phase, and the mixture was then cooled by an ice bath. 30 minutes later, 2-(triphenylphosphoranylidene)acetophenone (15 mmol, 5.71 g) was added and the suspension was allowed to warm slowly to RT. After completed (monitored by TLC analysis), suction filtration and concentration, the residue was subjected to flash chromatography (petroleum ether/EtOAc = 15/1) to afford (*E*)-benzyl 4-phenyl-4-oxo-2-butenate **1d** as a yellow solid in 72% yield (2 steps). *NOTE: 1a* was used as received.

**(*E*)-Methyl 4-phenyl-4-oxo-2-butenate (1b).** Yellow liquid, 46% yield. <sup>1</sup>H NMR (600 MHz, CDCl<sub>3</sub>) δ (ppm) 8.00 (d, *J* = 7.8 Hz, 2H), 7.93 (d, *J* = 15.6 Hz, 1H), 7.62 (t, *J* = 7.2 Hz, 1H), 7.51 (t, *J* = 7.8 Hz, 2H), 6.90 (d, *J* = 15.6 Hz, 1H), 3.85 (s, 3H); <sup>13</sup>C NMR (150 MHz, CDCl<sub>3</sub>) δ (ppm) 189.3, 165.9, 136.5, 133.8, 132.0, 128.8, 128.8, 52.3; MS (EI) *m/z* 190 (*M*<sup>+</sup>).

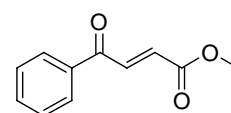

**(*E*)-Isopropyl 4-phenyl-4-oxo-2-butenate (1c).** Yellow liquid, 67% yield. <sup>1</sup>H NMR (600 MHz, CDCl<sub>3</sub>) δ (ppm) 8.00 (d, *J* = 7.2 Hz, 2H), 7.89 (d, *J* = 15.6 Hz, 1H), 7.63 (t, *J* = 7.8 Hz, 1H), 7.52 (t, *J* = 7.8 Hz, 2H), 6.86 (d, *J* = 15.6 Hz, 1H), 5.19-5.13 (m, 1H), 1.33 (s, 3H), 1.32 (s, 3H); <sup>13</sup>C NMR (150 MHz, CDCl<sub>3</sub>) δ (ppm) 189.4, 164.9, 136.5, 136.0, 133.6, 132.9, 128.7, 68.8, 21.6; MS (EI) *m/z* 219 (*M*<sup>+</sup>+1).

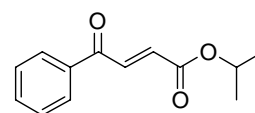

**(*E*)-Benzyl 4-phenyl-4-oxo-2-butenate (1d).** Yellow solid, 72% yield. <sup>1</sup>H NMR (600 MHz, CDCl<sub>3</sub>) δ (ppm) 7.99 (d, *J* = 6.6 Hz, 2H), 7.93 (d, *J* = 15.6 Hz, 1H), 7.62 (t, *J* = 6.6 Hz, 1H), 7.51 (t, *J* = 7.2 Hz, 2H), 7.44-7.35 (m, 5H), 6.93 (d, *J* = 15.6 Hz, 1H), 5.28 (s, 2H); <sup>13</sup>C NMR (150 MHz, CDCl<sub>3</sub>) δ (ppm) 189.3, 165.3, 136.7, 136.4, 135.2, 133.8, 132.1, 128.8, 128.7, 128.6, 128.4, 128.3, 67.0; MS (EI) *m/z* 266 (*M*<sup>+</sup>).

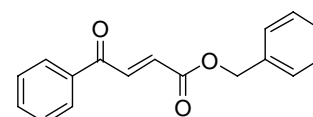

**(*E*)-Ethyl 4-(4-nitro-phenyl)-4-oxo-2-butenate (1e).** Yellow solid, 65% yield. <sup>1</sup>H NMR (600 MHz, CDCl<sub>3</sub>) δ (ppm) 8.37 (d, *J* = 9.0 Hz, 2H), 8.16 (d, *J* = 9.0 Hz, 2H), 7.87 (d, *J* = 15.6 Hz, 1H), 6.94 (d, *J* = 15.6 Hz, 1H), 4.33 (q, *J* = 7.2 Hz, 2H), 1.37 (t, *J* = 7.2 Hz, 3H); <sup>13</sup>C

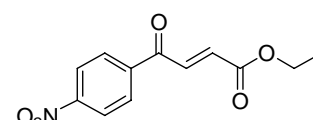

NMR (150 MHz, CDCl<sub>3</sub>)  $\delta$  (ppm) 188.1, 165.0, 150.5, 141.0, 135.1, 134.2, 130.0, 124.0, 61.6, 14.1; MS (EI)  $m/z$  249 ( $M^+$ ).

**(E)-Ethyl 4-(3-nitro-phenyl)-4-oxo-2-butenolate (1f).** Yellow solid, 73% yield. <sup>1</sup>H NMR (600 MHz, CDCl<sub>3</sub>)  $\delta$  (ppm) 8.82 (s, 1H), 8.49 (d,  $J$  = 9.6 Hz, 1H), 8.33 (d,  $J$  = 7.8 Hz, 1H), 7.90 (d,  $J$  = 15.6 Hz, 1H), 7.75 (t,  $J$  = 8.4 Hz, 1H), 6.97 (d,  $J$  = 15.6 Hz, 1H), 4.34 (q,  $J$  = 7.2 Hz, 2H), 1.37 (t,  $J$  = 7.2 Hz, 3H); <sup>13</sup>C NMR (150 MHz, CDCl<sub>3</sub>)  $\delta$  (ppm) 187.3, 164.9, 148.4, 137.6, 134.7, 134.1, 134.0, 130.1, 127.8, 123.3, 61.6, 14.0; MS (EI)  $m/z$  249 ( $M^+$ ).

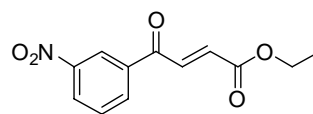

**(E)-Ethyl 4-(2-nitro-phenyl)-4-oxo-2-butenolate (1g).** Yellow solid, 64% yield. <sup>1</sup>H NMR (600 MHz, CDCl<sub>3</sub>)  $\delta$  (ppm) 8.22 (d,  $J$  = 8.4 Hz, 1H), 7.80 (d,  $J$  = 7.2 Hz, 1H), 7.70 (t,  $J$  = 7.2 Hz, 1H), 7.47 (d,  $J$  = 7.2 Hz, 1H), 7.31 (d,  $J$  = 16.2 Hz, 1H), 6.37 (d,  $J$  = 16.2 Hz, 1H), 4.25 (q,  $J$  = 7.2 Hz, 2H), 1.31 (t,  $J$  = 7.2 Hz, 3H); <sup>13</sup>C NMR (150 MHz, CDCl<sub>3</sub>)  $\delta$  (ppm) 191.9, 164.8, 146.2, 139.3, 135.0, 134.5, 132.8, 132.3, 128.5, 124.5, 61.5, 14.0; MS (EI)  $m/z$  249 ( $M^+$ ).

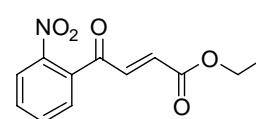

**(E)-Ethyl 4-(4-methoxy-phenyl)-4-oxo-2-butenolate (1h).** Yellow solid, 80% yield. <sup>1</sup>H NMR (600 MHz, CDCl<sub>3</sub>)  $\delta$  (ppm) 8.01 (d,  $J$  = 8.4 Hz, 2H), 7.92 (d,  $J$  = 15.6 Hz, 1H), 6.98 (d,  $J$  = 9.0 Hz, 2H), 6.87 (d,  $J$  = 15.6 Hz, 1H), 4.30 (q,  $J$  = 7.2 Hz, 2H), 3.90 (s, 3H), 1.37 (t,  $J$  = 7.2 Hz, 3H); <sup>13</sup>C NMR (150 MHz, CDCl<sub>3</sub>)  $\delta$  (ppm) 187.4, 165.6, 164.0, 136.3, 132.6, 131.3, 129.5, 114.0, 61.1, 55.4, 14.0; MS (EI)  $m/z$  234 ( $M^+$ ).

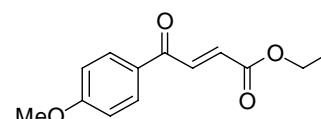

**(E)-Ethyl 4-(3-methoxy-phenyl)-4-oxo-2-butenolate (1i).** Yellow solid, 75% yield. <sup>1</sup>H NMR (600 MHz, CDCl<sub>3</sub>)  $\delta$  (ppm) 7.89 (d,  $J$  = 15.6 Hz, 1H), 7.85 (d,  $J$  = 7.8 Hz, 1H), 7.52 (s, 1H), 7.42 (t,  $J$  = 7.8 Hz, 1H), 7.17 (d,  $J$  = 8.4 Hz, 1H), 6.89 (d,  $J$  = 15.6 Hz, 1H), 4.31 (q,  $J$  = 7.2 Hz, 2H), 3.88 (s, 3H), 1.36 (t,  $J$  = 7.2 Hz, 3H); <sup>13</sup>C NMR (150 MHz, CDCl<sub>3</sub>)  $\delta$  (ppm) 189.1, 165.4, 159.9, 137.8, 136.2, 132.4, 129.7, 121.4, 120.4, 112.6, 61.2, 55.3, 14.0; MS (EI)  $m/z$  234 ( $M^+$ ).

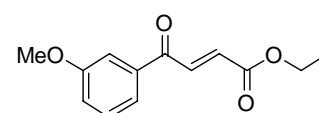

**(E)-Ethyl 4-(4-methyl-phenyl)-4-oxo-2-butenolate (1j).** Yellow liquid, 77% yield. <sup>1</sup>H NMR (600 MHz, CDCl<sub>3</sub>)  $\delta$  (ppm) 7.92-7.90 (m, 3H), 7.31 (d,  $J$  = 7.8 Hz, 2H), 6.88 (d,  $J$  = 15.6 Hz, 1H), 4.30 (q,  $J$  = 7.2 Hz, 2H), 2.43 (s, 3H), 1.35 (t,  $J$  = 7.2 Hz, 3H); <sup>13</sup>C NMR (150 MHz, CDCl<sub>3</sub>)  $\delta$  (ppm) 188.7, 165.5, 144.7, 136.3, 134.0, 132.0, 129.4, 128.8, 61.2, 21.6, 14.1; MS (EI)  $m/z$  218 ( $M^+$ ).

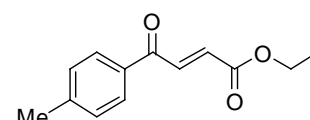

**(E)-Ethyl 4-(4-fluoro-phenyl)-4-oxo-2-butenolate (1k).** Yellow liquid, 73% yield.  $^1\text{H}$  NMR (600 MHz,  $\text{CDCl}_3$ )  $\delta$  (ppm) 8.05 (dd,  $J = 8.4$  and  $5.4$  Hz, 2H), 7.88 (d,  $J = 15.6$  Hz, 1H), 7.19 (t,  $J = 8.4$  Hz, 2H), 6.89 (d,  $J = 16.2$  Hz, 1H), 4.31 (q,  $J = 6.6$  Hz, 2H), 1.36 (t,  $J = 7.2$  Hz, 3H);  $^{13}\text{C}$  NMR (150 MHz,  $\text{CDCl}_3$ )  $\delta$  (ppm) 187.6, 166.8, 165.3, 166.1, 135.8, 132.9, 132.8, 132.6, 131.5, 131.4, 116.0, 115.9, 61.3, 14.0; MS (EI)  $m/z$  222 ( $\text{M}^+$ ).

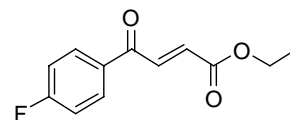

**(E)-Ethyl 4-(4-chloro-phenyl)-4-oxo-2-butenolate (1l).** Yellow liquid, 69% yield.  $^1\text{H}$  NMR (600 MHz,  $\text{CDCl}_3$ )  $\delta$  (ppm) 7.95 (d,  $J = 8.4$  Hz, 2H), 7.87 (d,  $J = 15.6$  Hz, 1H), 7.50 (d,  $J = 8.4$  Hz, 2H), 6.90 (d,  $J = 15.6$  Hz, 1H), 4.31 (q,  $J = 7.2$  Hz, 2H), 1.36 (t,  $J = 7.2$  Hz, 3H);  $^{13}\text{C}$  NMR (150 MHz,  $\text{CDCl}_3$ )  $\delta$  (ppm) 188.2, 165.4, 140.4, 135.7, 134.9, 133.0, 129.2, 61.4, 14.1; MS (EI)  $m/z$  237 ( $\text{M}^+-1$ ), 239 ( $\text{M}^++1$ ).

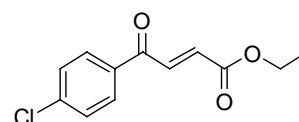

**(E)-Ethyl 4-(4-bromo-phenyl)-4-oxo-2-butenolate (1m).** Yellow liquid, 74% yield.  $^1\text{H}$  NMR (600 MHz,  $\text{CDCl}_3$ )  $\delta$  (ppm) 7.87 (d,  $J = 8.4$  Hz, 2H), 7.85 (d,  $J = 15.6$  Hz, 1H), 7.60 (d,  $J = 8.4$  Hz, 2H), 6.90 (d,  $J = 15.6$  Hz, 1H), 4.31 (q,  $J = 7.2$  Hz, 2H), 1.35 (t,  $J = 7.2$  Hz, 3H);  $^{13}\text{C}$  NMR (150 MHz,  $\text{CDCl}_3$ )  $\delta$  (ppm) 188.4, 165.3, 135.6, 135.2, 133.0, 132.1, 130.0, 129.2, 61.4, 14.1; MS (EI)  $m/z$  282 ( $\text{M}^+-1$ ), 284 ( $\text{M}^++1$ ).

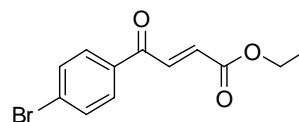

**(E)-Benzyl 4-(4-bromo-phenyl)-4-oxo-2-butenolate (1n).** Yellow solid, 85% yield.  $^1\text{H}$  NMR (600 MHz,  $\text{CDCl}_3$ )  $\delta$  (ppm) 7.88 (d,  $J = 15.6$  Hz, 1H), 7.85 (d,  $J = 8.4$  Hz, 2H), 7.65 (d,  $J = 8.4$  Hz, 2H), 6.94 (d,  $J = 15.6$  Hz, 1H), 5.28 (s, 2H);  $^{13}\text{C}$  NMR (150 MHz,  $\text{CDCl}_3$ )  $\delta$  (ppm) 188.3, 165.2, 136.1, 135.2, 132.6, 132.2, 130.2, 129.2, 128.2, 128.5, 128.4, 67.2; MS (EI)  $m/z$  344 ( $\text{M}^+-1$ ), 346 ( $\text{M}^++1$ ).

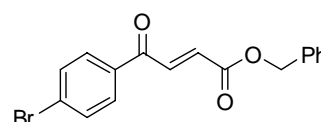

**(E)-Ethyl 4-(3-nitro-phenyl)-4-oxo-2-butenolate (1o).** Yellow solid, 72% yield.  $^1\text{H}$  NMR (600 MHz,  $\text{CDCl}_3$ )  $\delta$  (ppm) 8.12 (s, 1H), 7.92 (d,  $J = 7.8$  Hz, 1H), 7.84 (d,  $J = 15.6$  Hz, 1H), 7.75 (d,  $J = 8.4$  Hz, 1H), 7.40 (t,  $J = 7.8$  Hz, 1H), 6.90 (d,  $J = 15.6$  Hz, 1H), 4.31 (q,  $J = 7.2$  Hz, 2H), 1.36 (t,  $J = 7.2$  Hz, 3H);  $^{13}\text{C}$  NMR (150 MHz,  $\text{CDCl}_3$ )  $\delta$  (ppm) 187.6, 164.9, 138.0, 136.3, 135.2, 132.9, 131.4, 130.1, 127.1, 122.9, 61.2, 13.9; MS (EI)  $m/z$  282 ( $\text{M}^+-1$ ), 284 ( $\text{M}^++1$ ).

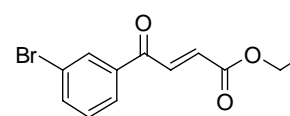

**(E)-Ethyl 4-(2-furanyl)-4-oxo-2-butenolate (1p).** Yellow solid, 74% yield.  $^1\text{H}$  NMR (600 MHz,  $\text{CDCl}_3$ )  $\delta$  (ppm) 7.87 (d,  $J = 4.8$  Hz, 1H), 7.79 (d,  $J = 15.6$  Hz, 1H), 7.77 (d,  $J = 4.8$  Hz, 1H), 7.21 (t,  $J = 4.8$  Hz, 1H), 6.94 (d,  $J = 15.6$  Hz, 1H), 4.31 (q,  $J = 7.2$  Hz, 2H), 1.36 (t,  $J = 7.2$  Hz, 3H);  $^{13}\text{C}$  NMR

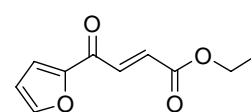

(150 MHz, CDCl<sub>3</sub>)  $\delta$  (ppm) 181.0, 165.4, 144.2, 135.8, 135.6, 133.4, 132.0, 128.5, 61.3, 14.1; MS (EI)  $m/z$  194 (M<sup>+</sup>).

**(E)-Ethyl 4-(2-thienyl)-4-oxo-2-butenolate (1q).** Yellow solid, 76% yield.

<sup>1</sup>H NMR (600 MHz, CDCl<sub>3</sub>)  $\delta$  (ppm) 7.87 (d,  $J$  = 4.2 Hz, 1H), 7.79 (d,  $J$  = 15.6 Hz, 1H), 7.77 (d,  $J$  = 4.8 Hz, 1H), 7.21 (t,  $J$  = 4.2 Hz, 1H), 6.94 (d,  $J$  = 15.6 Hz, 1H), 4.31 (q,  $J$  = 7.2 Hz, 2H), 1.36 (t,  $J$  = 7.2 Hz, 3H); <sup>13</sup>C NMR (150 MHz, CDCl<sub>3</sub>)  $\delta$  (ppm) 181.0, 165.4, 144.2, 135.8, 135.6, 133.4, 132.0, 128.5, 61.3, 14.1; MS (EI)  $m/z$  210 (M<sup>+</sup>).

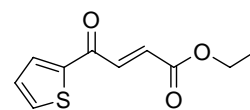

**(E)-Ethyl 4-(tert-butyl)-4-oxo-2-butenolate (1r).** Colorless liquid, 59% yield.

<sup>1</sup>H NMR (600 MHz, CDCl<sub>3</sub>)  $\delta$  (ppm) 7.51 (d,  $J$  = 15.6 Hz, 1H), 6.77 (d,  $J$  = 15.6 Hz, 1H), 4.27 (q,  $J$  = 7.2 Hz, 2H), 1.33 (t,  $J$  = 7.2 Hz, 3H), 1.20 (s, 9H); <sup>13</sup>C NMR (150 MHz, CDCl<sub>3</sub>)  $\delta$  (ppm) 203.0, 165.2, 135.0, 131.1, 60.8, 43.2, 25.4, 13.8; MS (EI)  $m/z$  184 (M<sup>+</sup>).

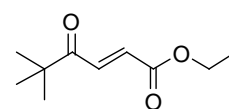

## Step B.

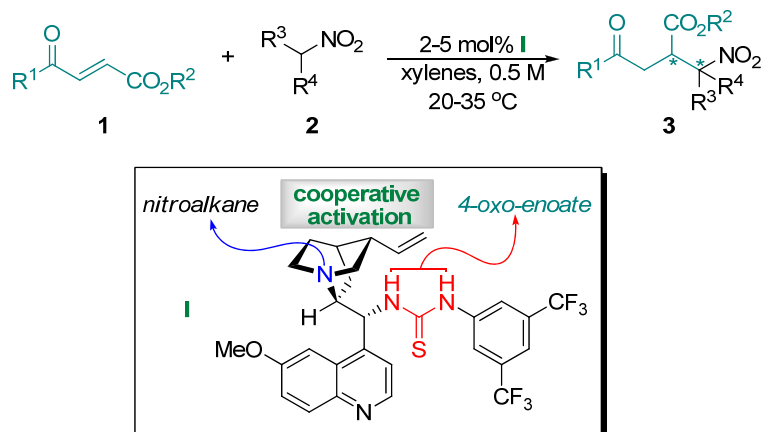

**General procedure for the asymmetric nitro-Michael reaction.** To a solution of nitroalkane **2** (1.0 mmol or 15 mmol) and 4-oxo-enoate **1** (0.25 or 5 mmol) in xylenes (0.5 mL or 10 mL) was added catalyst **I** at ambient temperature. After completed (monitored by TLC analysis), the mixture was purified by flash column chromatography on silica gel (PE/EA = 4/1 as eluant) to afford the desired product **3**.

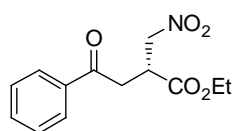

**(R)-Ethyl 2-(nitromethyl)-4-oxo-4-phenylbutanoate (3a).** Prepared according to the general procedure from **1a** (0.25 mmol), **2a** (1.00 mmol), **I** (0.0125 mmol) and xylenes (0.5 mL) at 25 °C for 12 h to provide the title compound as a colorless oil (95% yield, 96% ee). <sup>1</sup>H NMR (600 MHz, CDCl<sub>3</sub>) δ (ppm) 7.96 (d, *J* = 7.2 Hz, 2H), 7.60 (t, *J* = 7.2 Hz, 1H), 7.49 (t, *J* = 7.8 Hz, 2H), 4.87 (ABX, *J*<sub>AB</sub> = 14.4 Hz, *J*<sub>AX</sub> = 6.0 Hz, *J*<sub>BX</sub> = 5.4 Hz, 1H), 4.80 (ABX, *J*<sub>AB</sub> = 14.4 Hz, *J*<sub>AX</sub> = 6.0 Hz, *J*<sub>BX</sub> = 5.4 Hz, 1H), 4.24-4.21 (m, 2H), 3.78-3.74 (m, 1H), 3.61 (ABX, *J*<sub>AB</sub> = 18.6 Hz, *J*<sub>AX</sub> = 5.4 Hz, *J*<sub>BX</sub> = 6.6 Hz, 1H), 3.39 (ABX, *J*<sub>AB</sub> = 18.6 Hz, *J*<sub>AX</sub> = 5.4 Hz, *J*<sub>BX</sub> = 6.6 Hz, 1H), 1.26 (t, *J* = 7.2 Hz, 3H); <sup>13</sup>C NMR(100

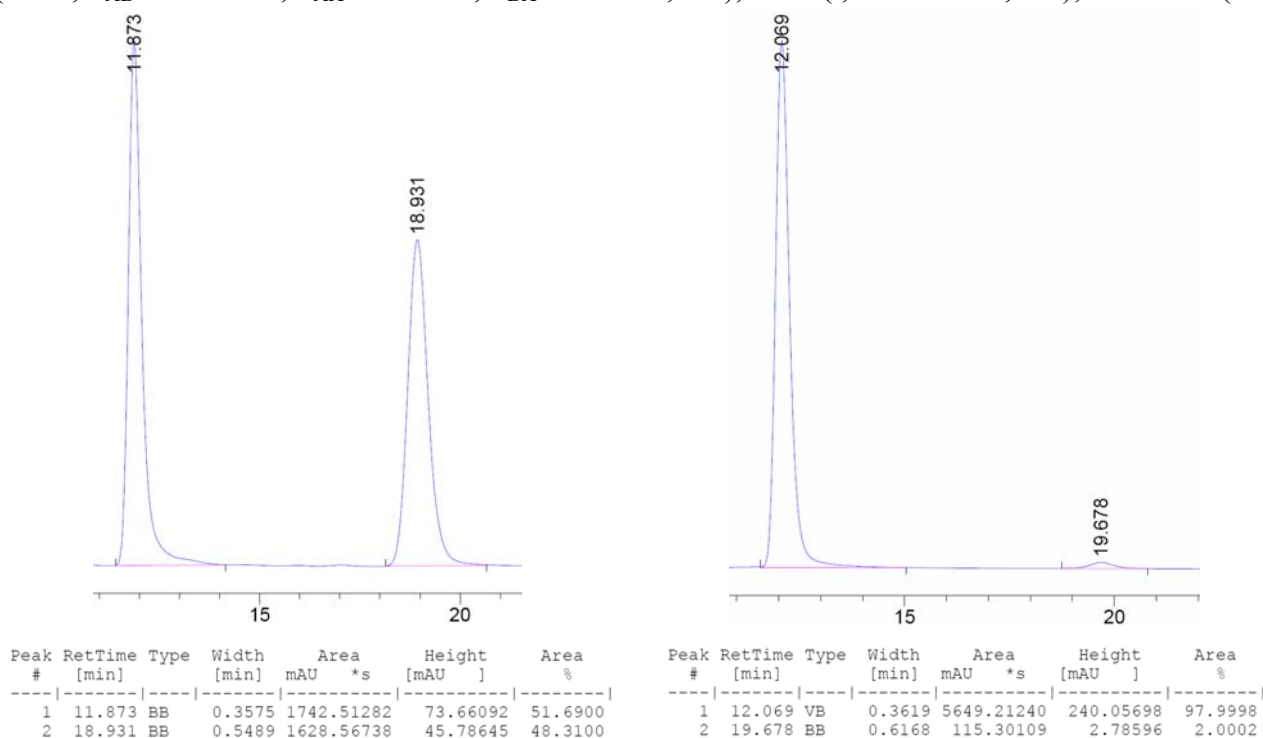

MHz, CDCl<sub>3</sub>)  $\delta$  (ppm) 196.4, 170.8, 135.9, 133.8, 128.7, 128.0, 74.7, 61.8, 38.3, 36.9, 13.9; MS (EI)  $m/z$  264 ( $M^+ - 1$ ); *Anal. Calcd.* for C<sub>13</sub>H<sub>15</sub>NO<sub>5</sub>: C, 58.86; H, 5.70; N, 5.28; Found: C, 58.95; H, 5.57; N, 5.18; [ $\alpha$ ]<sub>D</sub><sup>25</sup> = -3.2 ( $c$  = 0.58, CHCl<sub>3</sub>); the enantiomeric excess was determined by chiral HPLC (Chiralpak OD column: hexane/2-propanol = 80/20, 1 mL/min, 254 nm,  $t_{\text{major}}$  = 12.07 min,  $t_{\text{minor}}$  = 19.68 min.)

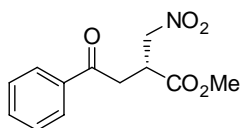

**(R)-Methyl 2-(nitromethyl)-4-oxo-4-phenylbutanoate (3b).** Prepared according to the general procedure from **1b** (0.25 mmol), **2a** (1.00 mmol), **I** (0.0125 mmol) and xylenes (0.5 mL) at 25 °C for 10 h to provide the title compound as a colorless oil (89% yield, 96% ee). <sup>1</sup>H NMR (600 MHz, CDCl<sub>3</sub>)

$\delta$  (ppm) 7.96 (d,  $J$  = 7.2 Hz, 2H), 7.61 (t,  $J$  = 7.2 Hz, 1H), 7.49 (t,  $J$  = 7.8 Hz, 2H), 4.88 (ABX,  $J_{AB}$  = 14.4 Hz,  $J_{AX}$  = 6.0 Hz,  $J_{BX}$  = 4.8 Hz, 1H), 4.80 (ABX,  $J_{AB}$  = 14.4 Hz,  $J_{AX}$  = 6.0 Hz,  $J_{BX}$  = 4.8 Hz, 1H), 3.77 (s, 3H), 3.62 (ABX,  $J_{AB}$  = 18.6 Hz,  $J_{AX}$  = 5.4 Hz,  $J_{BX}$  = 7.2 Hz, 1H), 3.41 (ABX,  $J_{AB}$  = 18.6 Hz,  $J_{AX}$  = 5.4 Hz,  $J_{BX}$  = 7.2 Hz, 1H); <sup>13</sup>C NMR (150 MHz, CDCl<sub>3</sub>)  $\delta$  (ppm) 196.3, 171.3, 135.7, 133.8, 128.7, 128.0, 74.6, 38.1, 37.0, 13.9; *Anal. Calcd.* for C<sub>12</sub>H<sub>13</sub>NO<sub>5</sub>: C, 57.37; H, 5.22; N, 5.58; Found: C, 57.43; H, 5.33; N, 5.47; the enantiomeric excess was determined by chiral HPLC (Chiralpak OD column: hexane/2-propanol = 80/20, 1 mL/min, 254 nm,  $t_{\text{major}}$  = 14.45 min,  $t_{\text{minor}}$  = 21.92 min.)

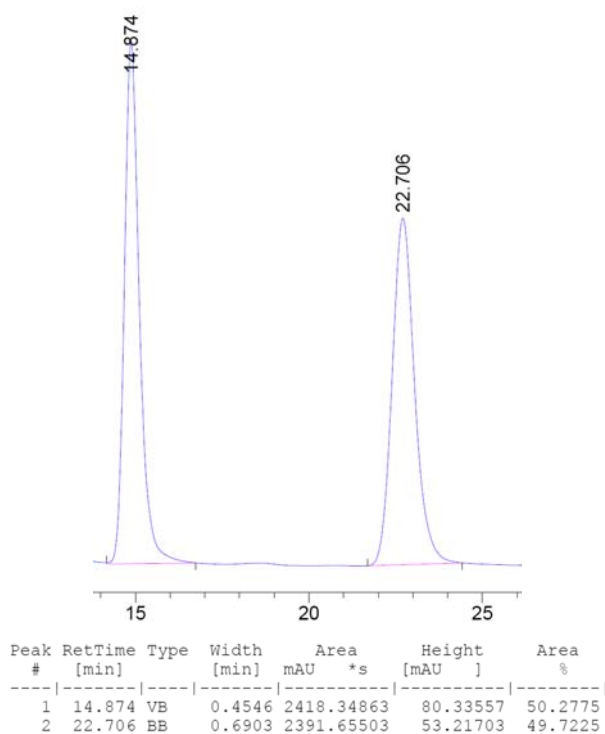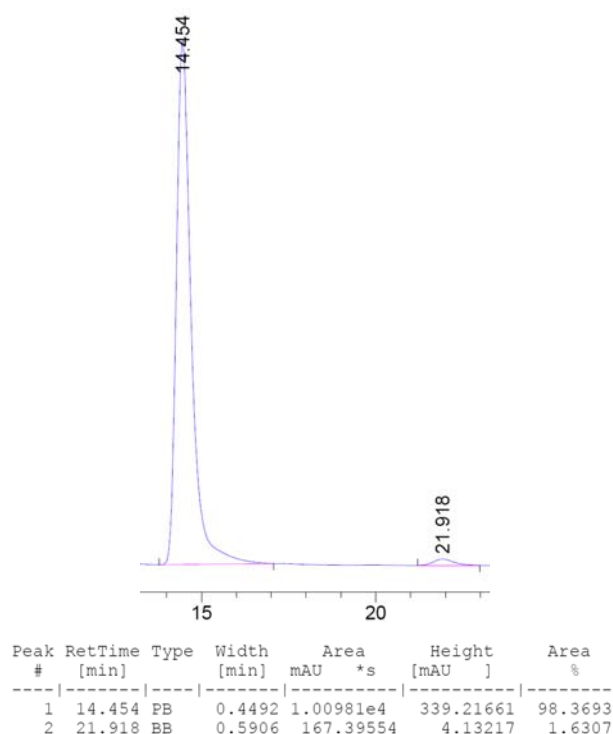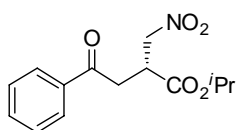

**(R)-Isopropyl 2-(nitromethyl)-4-oxo-4-phenylbutanoate (3c).** Prepared according to the general procedure from **1c** (0.25 mmol), **2a** (1.00 mmol), **I** (0.0125 mmol) and xylenes (0.5 mL) at 25 °C for 12 h to provide the title compound as a colorless oil (97% yield, 96% ee). <sup>1</sup>H NMR (600 MHz, CDCl<sub>3</sub>)

$\delta$  (ppm) 7.96 (d,  $J = 7.2$  Hz, 2H), 7.61 (t,  $J = 7.2$  Hz, 1H), 7.49 (t,  $J = 8.4$  Hz, 2H), 5.10-5.06 (m, 1H), 4.85 (ABX,  $J_{AB} = 14.4$  Hz,  $J_{AX} = 6.0$  Hz,  $J_{BX} = 5.4$  Hz, 1H), 4.80 (ABX,  $J_{AB} = 14.4$  Hz,  $J_{AX} = 6.0$  Hz,  $J_{BX} = 5.4$  Hz, 1H), 3.74-3.70 (m, 1H), 3.60 (ABX,  $J_{AB} = 18.0$  Hz,  $J_{AX} = 4.8$  Hz,  $J_{BX} = 7.2$  Hz, 1H), 3.36 (ABX,  $J_{AB} = 18.0$  Hz,  $J_{AX} = 4.8$  Hz,  $J_{BX} = 7.2$  Hz, 1H), 1.23 (t,  $J = 6.6$  Hz, 6H);  $^{13}\text{C}$  NMR (150 MHz,  $\text{CDCl}_3$ )  $\delta$  (ppm) 196.5, 170.3, 135.9, 133.8, 128.7, 128.0, 74.8, 69.6, 38.5, 36.9, 21.5; *Anal. Calcd.* for  $\text{C}_{14}\text{H}_{17}\text{NO}_5$ : C, 60.21; H, 6.14; N, 5.02; Found: C, 60.27; H, 6.03; N, 4.95; the enantiomeric excess was determined by chiral HPLC (Chiralpak OD column: hexane/2-propanol = 80/20, 1 mL/min, 254 nm,  $t_{\text{major}} = 9.57$  min,  $t_{\text{minor}} = 14.96$  min.)

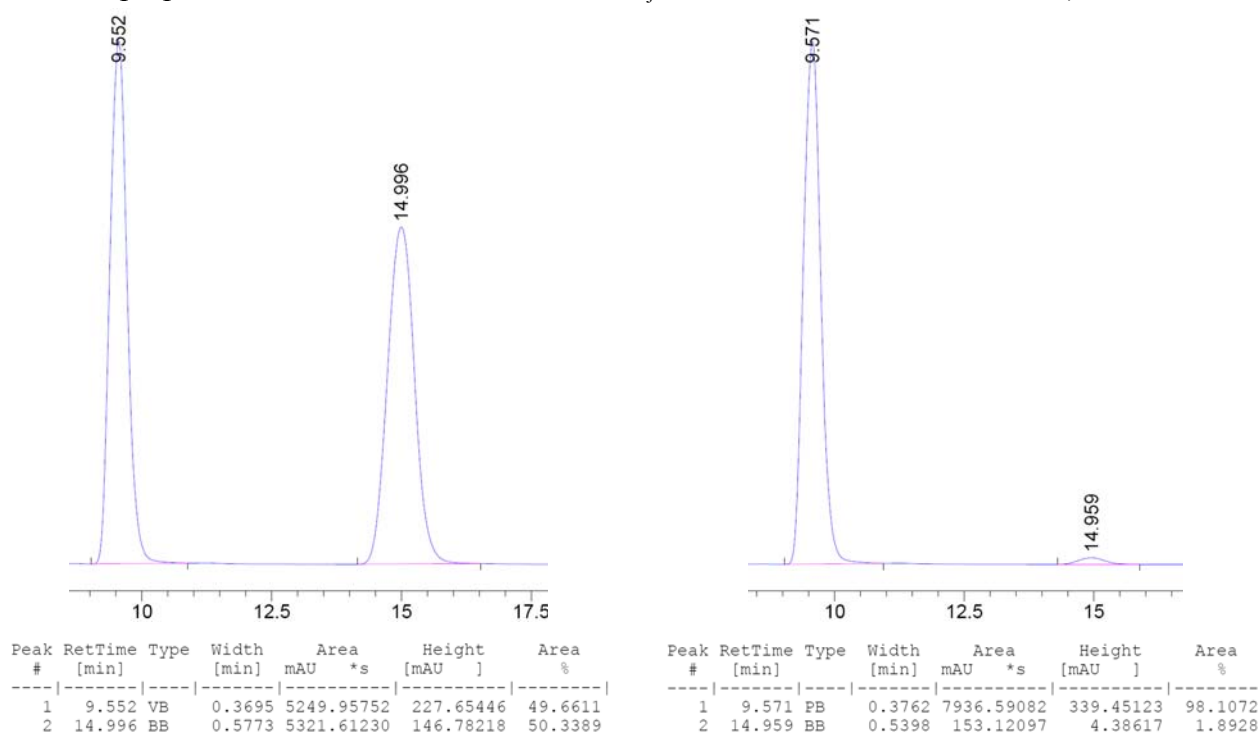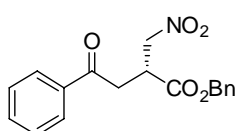

**(R)-Benzyl 2-(nitromethyl)-4-oxo-4-phenylbutanoate (3d).** Prepared according to the general procedure from **1d** (0.25 mmol), **2a** (1.00 mmol), **I** (0.0125 mmol) and xylenes (0.5 mL) at 25 °C for 12 h to provide the title compound as a colorless oil (98% yield, 96% ee).  $^1\text{H}$  NMR (600 MHz,  $\text{CDCl}_3$ )

$\delta$  (ppm) 7.94 (d,  $J = 7.2$  Hz, 2H), 7.60 (t,  $J = 7.2$  Hz, 1H), 7.48 (t,  $J = 6.6$  Hz, 2H), 7.34 (br, 5H), 5.19 (s, 2H), 4.88 (ABX,  $J_{AB} = 14.4$  Hz,  $J_{AX} = 5.4$  Hz,  $J_{BX} = 4.8$  Hz, 1H), 4.81 (ABX,  $J_{AB} = 14.4$  Hz,  $J_{AX} = 5.4$  Hz,  $J_{BX} = 4.8$  Hz, 1H), 3.82 (br, 1H), 3.63 (ABX,  $J_{AB} = 18.6$  Hz,  $J_{AX} = 4.8$  Hz,  $J_{BX} = 6.0$  Hz, 1H), 3.40 (ABX,  $J_{AB} = 18.6$  Hz,  $J_{AX} = 4.8$  Hz,  $J_{BX} = 6.0$  Hz, 1H);  $^{13}\text{C}$  NMR (150 MHz,  $\text{CDCl}_3$ )  $\delta$  (ppm) 196.4, 170.7, 135.8, 135.0, 133.8, 128.7, 128.6, 128.5, 128.2, 128.0, 67.6, 38.3, 36.9; *Anal. Calcd.* for  $\text{C}_{18}\text{H}_{17}\text{NO}_5$ : C, 66.05; H, 5.23; N, 4.28; Found: C, 66.12; H, 5.19; N, 4.17; the enantiomeric excess was determined by chiral HPLC (Chiralpak AD column: hexane/2-propanol = 80/20, 1 mL/min, 254 nm,  $t_{\text{major}} = 13.70$  min,  $t_{\text{minor}} = 15.59$  min.)

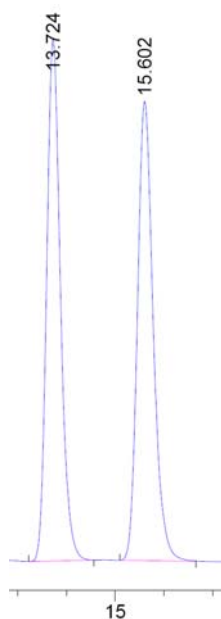

| Peak # | RetTime [min] | Type | Width [min] | Area mAU*s | Height [mAU] | Area %  |
|--------|---------------|------|-------------|------------|--------------|---------|
| 1      | 13.724        | VB   | 0.2999      | 2581.40430 | 131.78053    | 49.8474 |
| 2      | 15.602        | PB   | 0.3431      | 2597.21069 | 115.85150    | 50.1526 |

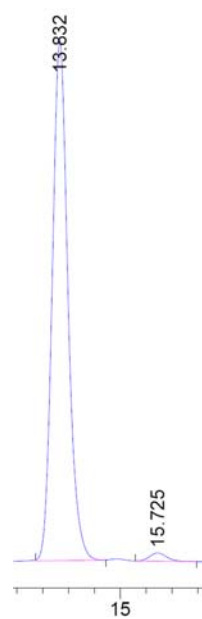

| Peak # | RetTime [min] | Type | Width [min] | Area mAU*s | Height [mAU] | Area %  |
|--------|---------------|------|-------------|------------|--------------|---------|
| 1      | 13.702        | VV   | 0.3091      | 984.35724  | 49.21328     | 98.1922 |
| 2      | 15.590        | MM   | 0.3948      | 18.12283   | 7.64977e-1   | 1.8078  |

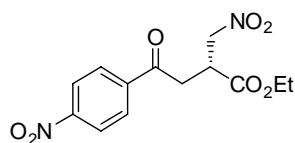

**(R)-Ethyl 2-(nitromethyl)-4-(4-nitrophenyl)-4-oxobutanoate (3e).**

Prepared according to the general procedure from **1e** (0.25 mmol), **2a** (1.00 mmol), **1** (0.0125 mmol) and xylenes (0.5 mL) at 25 °C for 8 h to provide the title compound as a colorless oil (94% yield, 97% ee). <sup>1</sup>H NMR (600 MHz, CDCl<sub>3</sub>) δ (ppm) 8.34 (d, *J* = 8.4 Hz, 2H), 8.14 (d, *J* = 8.4 Hz, 2H), 4.86 (dd, *J* = 5.4 and 1.8 Hz, 2H), 4.26-4.21 (m, 2H), 3.81-3.76 (m, 1H), 3.69 (ABX, *J*<sub>AB</sub> = 18.6 Hz, *J*<sub>AX</sub> = *J*<sub>BX</sub> = 6.0 Hz, 1H),

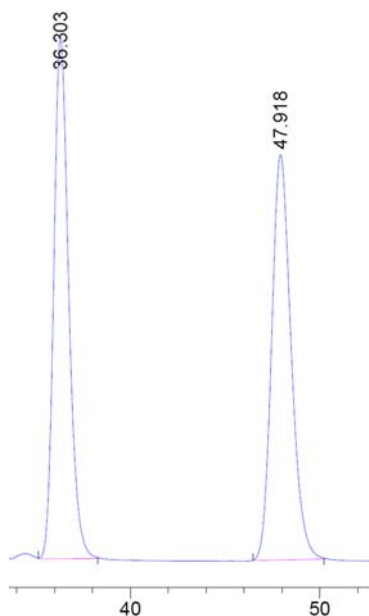

| Peak # | RetTime [min] | Type | Width [min] | Area mAU*s | Height [mAU] | Area %  |
|--------|---------------|------|-------------|------------|--------------|---------|
| 1      | 36.303        | VB   | 0.8361      | 4721.67383 | 86.52353     | 49.6823 |
| 2      | 47.918        | BB   | 1.0906      | 4782.06543 | 67.22177     | 50.3177 |

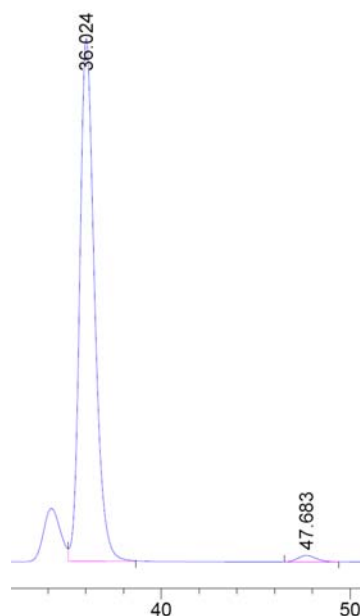

| Peak # | RetTime [min] | Type | Width [min] | Area mAU*s | Height [mAU] | Area %  |
|--------|---------------|------|-------------|------------|--------------|---------|
| 1      | 36.024        | VB   | 0.8296      | 1.76288e4  | 324.16568    | 98.4952 |
| 2      | 47.683        | BB   | 1.0359      | 269.32166  | 3.97075      | 1.5048  |

3.40 (ABX,  $J_{AB} = 18.6$  Hz,  $J_{AX} = J_{BX} = 6.0$  Hz, 1H), 1.27 (t,  $J = 7.2$  Hz, 3H);  $^{13}\text{C}$  NMR (150 MHz,  $\text{CDCl}_3$ )  $\delta$  (ppm) 195.3, 170.3, 150.6, 140.2, 129.2, 124.0, 74.6, 62.1, 38.3, 37.4, 13.9; *Anal. Calcd.* for  $\text{C}_{13}\text{H}_{14}\text{N}_2\text{O}_7$ : C, 50.33; H, 4.55; N, 9.03; Found: C, 50.47; H, 4.36; N, 8.88; the enantiomeric excess was determined by chiral HPLC (Chiralpak AD column: hexane/2-propanol = 80/20, 1 mL/min, 254 nm,  $t_{\text{major}} = 36.02$  min,  $t_{\text{minor}} = 47.68$  min.)

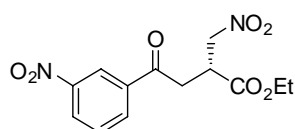

**(R)-Ethyl 2-(nitromethyl)-4-(3-nitrophenyl)-4-oxobutanoate (3f).**

Prepared according to the general procedure from **1f** (0.25 mmol), **2a** (1.00 mmol), **I** (0.0125 mmol) and xylenes (0.5 mL) at 25 °C for 4 h to provide the title compound as a colorless oil (95% yield, 98% ee).  $^1\text{H}$  NMR (600 MHz,  $\text{CDCl}_3$ )  $\delta$  (ppm) 8.78 (s, 1H), 8.46 (d,  $J = 8.4$  Hz, 1H), 8.31 (d,  $J = 7.8$  Hz, 1H), 4.90 (ABX,  $J_{AB} = 14.4$  Hz,  $J_{AX} = 6.0$  Hz,  $J_{BX} = 5.4$  Hz, 1H), 4.85 (ABX,  $J_{AB} = 14.4$  Hz,  $J_{AX} = 6.0$  Hz,  $J_{BX} = 5.4$  Hz, 1H), 4.26-4.20 (m, 2H), 3.83-3.79 (m, 1H), 3.71 (ABX,  $J_{AB} = 18.0$  Hz,  $J_{AX} = 5.4$  Hz,  $J_{BX} = 6.0$  Hz, 1H), 3.44 (ABX,  $J_{AB} = 18.0$  Hz,  $J_{AX} = 5.4$  Hz,  $J_{BX} = 6.0$  Hz, 1H), 1.27 (t,  $J = 7.2$  Hz, 3H);  $^{13}\text{C}$  NMR (150 MHz,  $\text{CDCl}_3$ )  $\delta$  (ppm) 194.6, 170.3, 148.4, 137.0, 133.6, 130.1, 127.9, 122.9, 74.6, 62.0, 38.2, 37.2, 13.9; *Anal. Calcd.* for  $\text{C}_{13}\text{H}_{14}\text{N}_2\text{O}_7$ : C, 50.33; H, 4.55; N, 9.03; Found: C, 50.29; H, 4.48; N, 8.54;  $[\alpha]_{\text{D}}^{25} = -6.2$  ( $c = 2.5$ ,  $\text{CHCl}_3$ ); the enantiomeric excess was determined by chiral HPLC (Chiralpak OD column: hexane/2-propanol = 80/20, 1 mL/min, 254 nm,  $t_{\text{major}} = 44.54$  min,  $t_{\text{minor}} = 49.86$  min.)

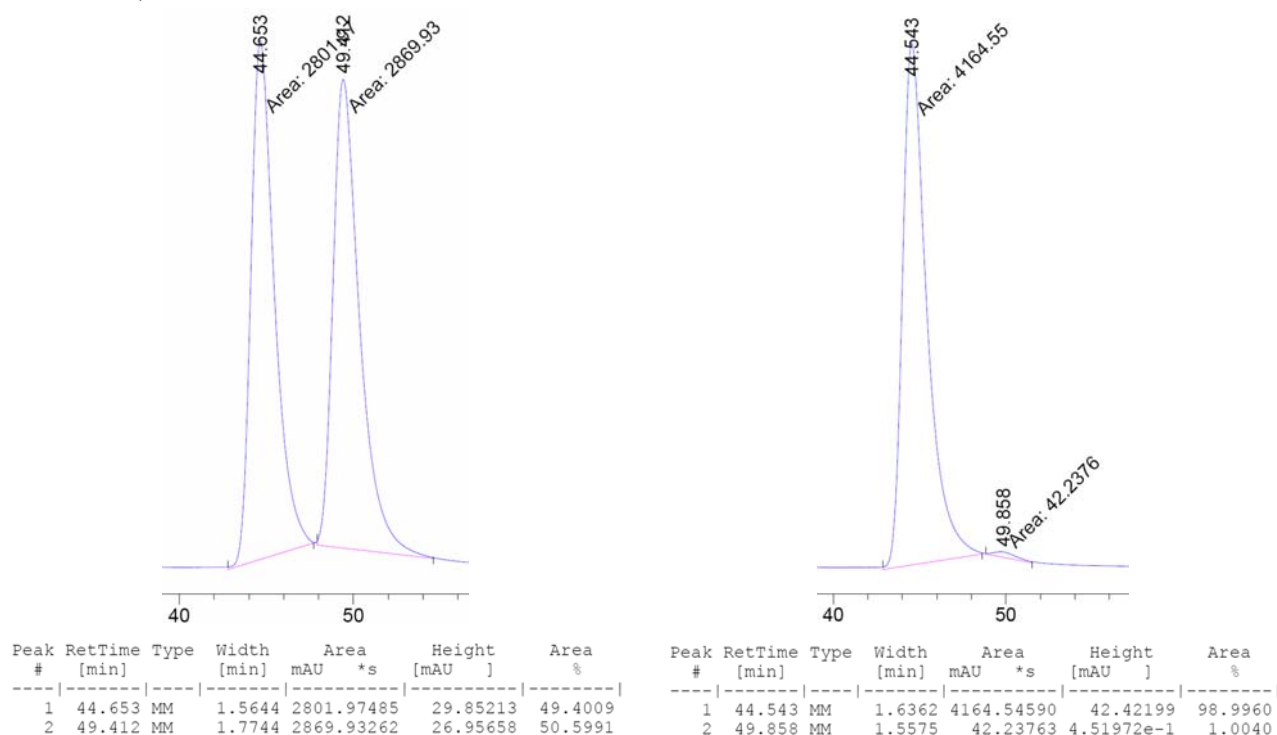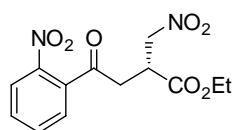

**(R)-Ethyl 2-(nitromethyl)-4-(2-nitrophenyl)-4-oxobutanoate (3g).** Prepared according to the general procedure from **1g** (0.25 mmol), **2a** (1.00 mmol), **I** (0.0125 mmol) and xylenes (0.5 mL) at 25 °C for 20 h to provide the title compound as a colorless oil (65% yield, 91% ee).  $^1\text{H}$  NMR (600 MHz,  $\text{CDCl}_3$ )

$\delta$  (ppm) 8.16 (d,  $J = 7.8$  Hz, 1H), 7.78 (t,  $J = 7.8$  Hz, 1H), 7.65 (t,  $J = 8.4$  Hz, 1H), 7.49 (d,  $J = 7.8$  Hz, 1H), 4.94-4.88 (m, 2H), 4.27-4.23 (m, 2H), 3.80-3.76 (m, 1H), 3.42 (ABX,  $J_{AB} = 18.6$  Hz,  $J_{AX} = 4.8$  Hz,  $J_{BX} = 6.0$  Hz, 1H), 3.29 (ABX,  $J_{AB} = 18.6$  Hz,  $J_{AX} = 4.8$  Hz,  $J_{BX} = 6.0$  Hz, 1H), 1.29 (t,  $J = 7.2$  Hz, 3H);  $^{13}\text{C}$  NMR (150 MHz,  $\text{CDCl}_3$ )  $\delta$  (ppm) 199.2, 170.5, 145.3, 136.8, 134.6, 130.9, 127.3, 124.6, 73.9, 62.0, 41.2, 38.0, 13.9; *Anal. Calcd.* for  $\text{C}_{13}\text{H}_{14}\text{N}_2\text{O}_7$ : C, 50.33; H, 4.55; N, 9.03; Found: C, 50.23; H, 4.66; N, 8.95;  $[\alpha]_{\text{D}}^{25} = 13.8$  ( $c = 2.1$ ,  $\text{CHCl}_3$ ); the enantiomeric excess was determined by chiral HPLC (Chiralpak OD column: hexane/2-propanol = 80/20, 1 mL/min, 254 nm,  $t_{\text{major}} = 19.25$  min,  $t_{\text{minor}} = 25.06$  min.)

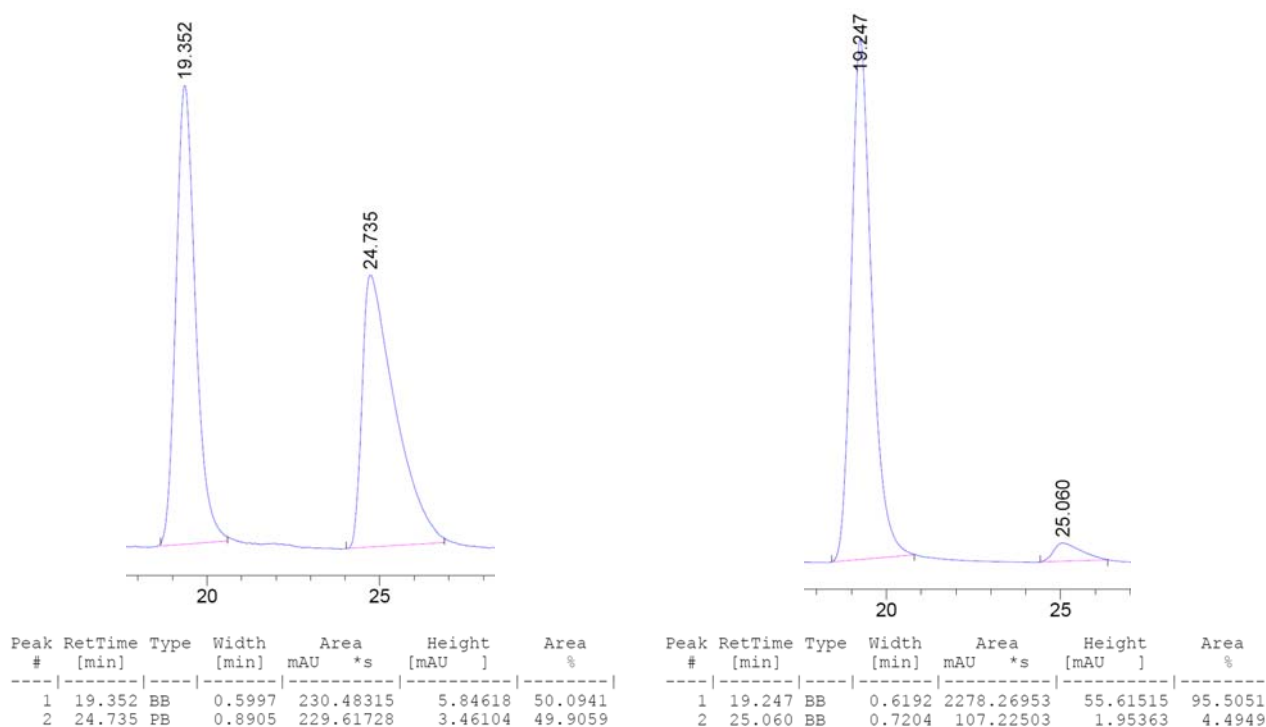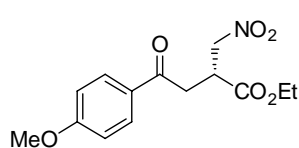

**(R)-Ethyl 4-(4-methoxyphenyl)-2-(nitromethyl)-4-oxobutanoate (3h).**

Prepared according to the general procedure from **1h** (0.25 mmol), **2a** (1.00 mmol), **1** (0.0125 mmol) and xylenes (0.5 mL) at 25 °C for 14 h to provide the title compound as a colorless oil (84% yield, 98% ee).  $^1\text{H}$  NMR (600 MHz,  $\text{CDCl}_3$ )  $\delta$  (ppm) 7.94 (d,  $J = 8.4$  Hz, 2H), 6.95 (d,  $J = 8.4$  Hz, 2H), 4.86 (ABX,  $J_{AB} = 14.4$  Hz,  $J_{AX} = 6.6$  Hz,  $J_{BX} = 5.4$  Hz, 1H), 4.76 (ABX,  $J_{AB} = 14.4$  Hz,  $J_{AX} = 6.6$  Hz,  $J_{BX} = 5.4$  Hz, 1H), 4.23-4.20 (m, 2H), 3.88 (s, 3H), 3.76-3.72 (m, 1H), 3.55 (ABX,  $J_{AB} = 18.0$  Hz,  $J_{AX} = 4.8$  Hz,  $J_{BX} = 7.2$  Hz, 1H), 3.34 (ABX,  $J_{AB} = 18.0$  Hz,  $J_{AX} = 4.8$  Hz,  $J_{BX} = 7.2$  Hz, 1H), 1.26 (t,  $J = 7.2$  Hz, 3H);  $^{13}\text{C}$  NMR (150 MHz,  $\text{CDCl}_3$ )  $\delta$  (ppm) 194.8, 171.0, 163.9, 130.4, 128.9, 113.9, 74.8, 61.8, 55.5, 38.4, 36.5, 13.9; *Anal. Calcd.* for  $\text{C}_{14}\text{H}_{17}\text{NO}_6$ : C, 56.94; H, 5.80; N, 4.74; Found: C, 57.01; H, 5.76; N, 4.67;  $[\alpha]_{\text{D}}^{25} = 4.4$  ( $c = 1.3$ ,  $\text{CHCl}_3$ ); the enantiomeric excess was determined by chiral HPLC (Chiralpak AS column: hexane/2-propanol = 75/25, 1 mL/min, 254 nm,  $t_{\text{minor}} = 26.03$  min,  $t_{\text{major}} = 28.42$  min.)

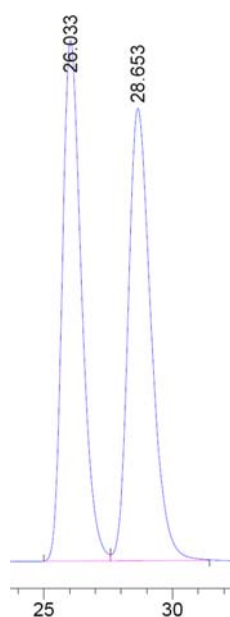

| Peak # | RetTime [min] | Type | Width [min] | Area mAU   | Area *s | Height [mAU] | Area %  |
|--------|---------------|------|-------------|------------|---------|--------------|---------|
| 1      | 26.033        | BV   | 0.8039      | 4663.16211 |         | 89.36094     | 49.2968 |
| 2      | 28.653        | VB   | 0.9511      | 4796.20361 |         | 77.60720     | 50.7032 |

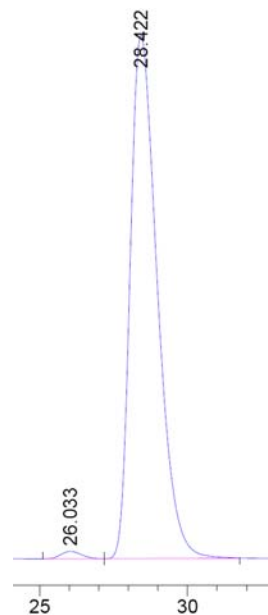

| Peak # | RetTime [min] | Type | Width [min] | Area mAU  | Area *s | Height [mAU] | Area %  |
|--------|---------------|------|-------------|-----------|---------|--------------|---------|
| 1      | 26.033        | PP   | 0.7567      | 139.90353 |         | 2.90647      | 1.0828  |
| 2      | 28.422        | VB   | 0.9737      | 1.27811e4 |         | 201.30963    | 98.9172 |

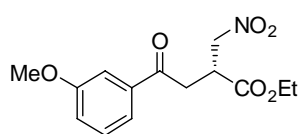

**(R)-Ethyl 4-(3-methoxyphenyl)-2-(nitromethyl)-4-oxobutanoate (3i).**

Prepared according to the general procedure from **1i** (0.25 mmol), **2a** (1.00 mmol), **1** (0.0125 mmol) and xylenes (0.5 mL) at 25 °C for 14 h to provide the title compound as a colorless oil (91% yield, 94% ee). <sup>1</sup>H NMR (600 MHz, CDCl<sub>3</sub>) δ (ppm) 7.54 (d, *J* = 7.8 Hz, 1H), 7.47 (s, 1H), 7.15 (d, *J* = 7.8 Hz, 1H), 4.87 (ABX, *J*<sub>AB</sub> = 14.4 Hz, *J*<sub>AX</sub> = 6.0 Hz, *J*<sub>BX</sub> = 5.4 Hz, 1H), 4.79 (ABX, *J*<sub>AB</sub> = 14.4 Hz, *J*<sub>AX</sub> = 6.0 Hz, *J*<sub>BX</sub> = 5.4

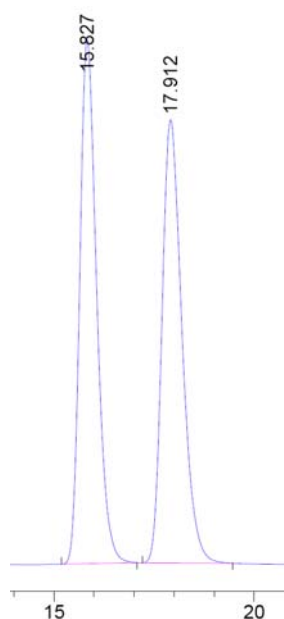

| Peak # | RetTime [min] | Type | Width [min] | Area mAU   | Area *s | Height [mAU] | Area %  |
|--------|---------------|------|-------------|------------|---------|--------------|---------|
| 1      | 15.827        | BB   | 0.4481      | 2569.52319 |         | 88.07060     | 49.9596 |
| 2      | 17.912        | BB   | 0.5313      | 2573.68335 |         | 74.46767     | 50.0404 |

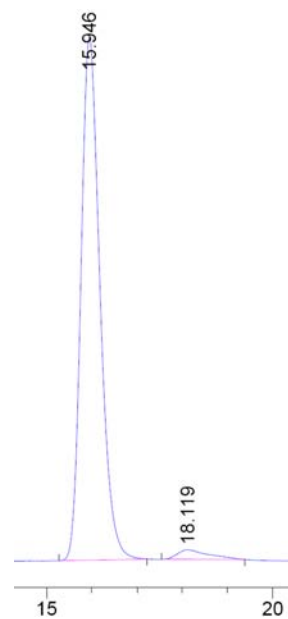

| Peak # | RetTime [min] | Type | Width [min] | Area mAU   | Area *s | Height [mAU] | Area %  |
|--------|---------------|------|-------------|------------|---------|--------------|---------|
| 1      | 15.946        | BB   | 0.4465      | 1541.16003 |         | 53.07421     | 97.0157 |
| 2      | 18.119        | BB   | 0.5988      | 47.40838   |         | 9.78347e-1   | 2.9843  |

Hz, 1H), 4.24-4.20 (m, 2H), 3.86 (s, 3H), 3.77-3.73 (m, 1H), 3.59 (ABX,  $J_{AB} = 18.0$  Hz,  $J_{AX} = 4.8$  Hz,  $J_{BX} = 6.6$  Hz, 1H), 3.38 (ABX,  $J_{AB} = 18.0$  Hz,  $J_{AX} = 4.8$  Hz,  $J_{BX} = 6.6$  Hz, 1H), 1.26 (t,  $J = 7.2$  Hz, 3H);  $^{13}\text{C}$  NMR (150 MHz,  $\text{CDCl}_3$ )  $\delta$  (ppm) 196.3, 170.8, 159.8, 137.1, 129.7, 120.6, 120.2, 112.2, 74.7, 61.8, 55.4, 38.3, 37.1, 13.9; *Anal. Calcd.* for  $\text{C}_{14}\text{H}_{17}\text{NO}_6$ : C, 56.94; H, 5.80; N, 4.74; Found: C, 57.02; H, 5.85; N, 4.47;  $[\alpha]_{\text{D}}^{25} = 1.4$  ( $c = 3.0$ ,  $\text{CHCl}_3$ ); the enantiomeric excess was determined by chiral HPLC (Chiralpak AS column: hexane/2-propanol = 75/25, 1 mL/min, 254 nm,  $t_{\text{major}} = 15.95$  min,  $t_{\text{minor}} = 18.12$  min.)

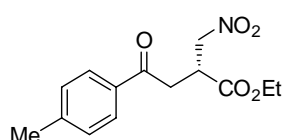

**(R)-Ethyl 2-(nitromethyl)-4-oxo-4-p-tolylbutanoate (3j).** Prepared according to the general procedure from **1j** (0.25 mmol), **2a** (1.00 mmol), **I** (0.0125 mmol) and xylenes (0.5 mL) at 25 °C for 7 h to provide the title compound as a colorless oil (93% yield, 96% ee).  $^1\text{H}$  NMR (600 MHz,  $\text{CDCl}_3$ )  $\delta$  (ppm) 7.86 (d,  $J = 7.8$  Hz, 2H), 7.28 (d,  $J = 7.8$  Hz, 2H), 4.86 (ABX,  $J_{AB} = 14.4$  Hz,  $J_{AX} = 6.0$  Hz,  $J_{BX} = 5.4$  Hz, 1H), 4.79 (ABX,  $J_{AB} = 14.4$  Hz,  $J_{AX} = 6.0$  Hz,  $J_{BX} = 5.4$  Hz, 1H), 4.24-4.19 (m, 2H), 3.76-3.73 (m, 1H), 3.58 (ABX,  $J_{AB} = 18.0$  Hz,  $J_{AX} = 4.8$  Hz,  $J_{BX} = 7.2$  Hz, 1H), 3.36 (ABX,  $J_{AB} = 18.0$  Hz,  $J_{AX} = 4.8$  Hz,  $J_{BX} = 7.2$  Hz, 1H), 2.42 (s, 3H), 1.26 (t,  $J = 7.2$  Hz, 3H);  $^{13}\text{C}$  NMR (150 MHz,  $\text{CDCl}_3$ )  $\delta$  (ppm) 196.0, 170.9, 144.7, 133.4, 129.4, 128.2, 74.7, 61.8, 38.4, 36.8, 21.7, 13.9; *Anal. Calcd.* for  $\text{C}_{14}\text{H}_{17}\text{NO}_5$ : C, 60.21; H, 6.14; N, 5.02; Found: C, 60.27; H, 6.09; N, 4.96;  $[\alpha]_{\text{D}}^{25} = 6.3$  ( $c = 1.6$ ,  $\text{CHCl}_3$ ); the enantiomeric excess was determined by chiral HPLC (Chiralpak OD column: hexane/2-propanol = 90/10, 1 mL/min, 254 nm,  $t_{\text{major}} = 16.55$  min,  $t_{\text{minor}} = 18.73$  min.)

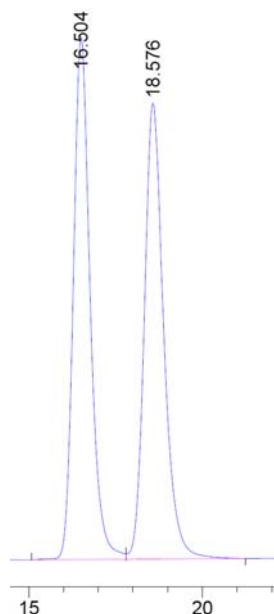

| Peak # | RetTime [min] | Type | Width [min] | Area mAU   | Area *s | Height [mAU] | Area %  |
|--------|---------------|------|-------------|------------|---------|--------------|---------|
| 1      | 16.504        | PV   | 0.5080      | 8080.30713 |         | 240.76898    | 49.8324 |
| 2      | 18.576        | VB   | 0.5860      | 8134.66699 |         | 209.93437    | 50.1676 |

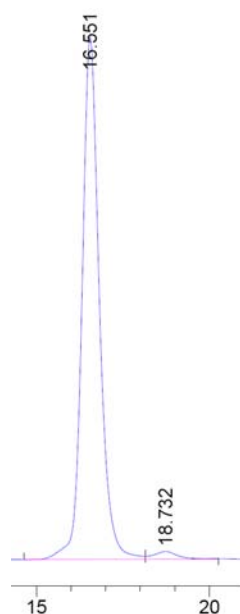

| Peak # | RetTime [min] | Type | Width [min] | Area mAU   | Area *s | Height [mAU] | Area %  |
|--------|---------------|------|-------------|------------|---------|--------------|---------|
| 1      | 16.551        | VV   | 0.5234      | 9616.66797 |         | 275.69974    | 97.9705 |
| 2      | 18.732        | VB   | 0.7024      | 199.21292  |         | 4.08860      | 2.0295  |

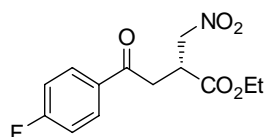

**(R)-Ethyl 4-(4-fluorophenyl)-2-(nitromethyl)-4-oxobutanoate (3k).** Prepared according to the general procedure from **1k** (0.25 mmol), **2a** (1.00 mmol), **I** (0.0125 mmol) and xylenes (0.5 mL) at 25 °C for 8 h to provide the

title compound as a colorless oil (93% yield, 96% ee).  $^1\text{H}$  NMR (600 MHz,  $\text{CDCl}_3$ )  $\delta$  (ppm) 8.00 (d,  $J = 8.4$  and  $5.4$  Hz, 2H), 7.16 (t,  $J = 9.0$  Hz, 2H), 4.86 (ABX,  $J_{\text{AB}} = 14.4$  Hz,  $J_{\text{AX}} = 6.0$  Hz,  $J_{\text{BX}} = 5.4$  Hz, 1H), 4.81 (ABX,  $J_{\text{AB}} = 14.4$  Hz,  $J_{\text{AX}} = 6.0$  Hz,  $J_{\text{BX}} = 5.4$  Hz, 1H), 4.25-4.19 (m, 2H), 3.77-3.73 (m, 1H), 3.59 (ABX,  $J_{\text{AB}} = 18.0$  Hz,  $J_{\text{AX}} = 5.4$  Hz,  $J_{\text{BX}} = 6.6$  Hz, 1H), 3.35 (ABX,  $J_{\text{AB}} = 18.0$  Hz,  $J_{\text{AX}} = 5.4$  Hz,  $J_{\text{BX}} = 6.6$  Hz, 1H), 1.26 (t,  $J = 7.2$  Hz, 3H);  $^{13}\text{C}$  NMR (150 MHz,  $\text{CDCl}_3$ )  $\delta$  (ppm) 194.9, 170.7, 166.9, 165.2, 132.3, 132.3, 130.8, 130.7, 116.0, 115.8, 74.7, 61.9, 38.3, 36.8, 13.9; *Anal. Calcd.* for  $\text{C}_{13}\text{H}_{14}\text{FNO}_5$ : C, 55.12; H, 4.98; N, 4.94; Found: C, 55.03; H, 4.89; N, 4.78;  $[\alpha]_{\text{D}}^{25} = -4.6$  ( $c = 1.0$ ,  $\text{CHCl}_3$ ); the enantiomeric excess was determined by chiral HPLC (Chiralpak AD column: hexane/2-propanol = 70/30, 1 mL/min, 254 nm,  $t_{\text{major}} = 7.81$  min,  $t_{\text{minor}} = 9.02$  min.)

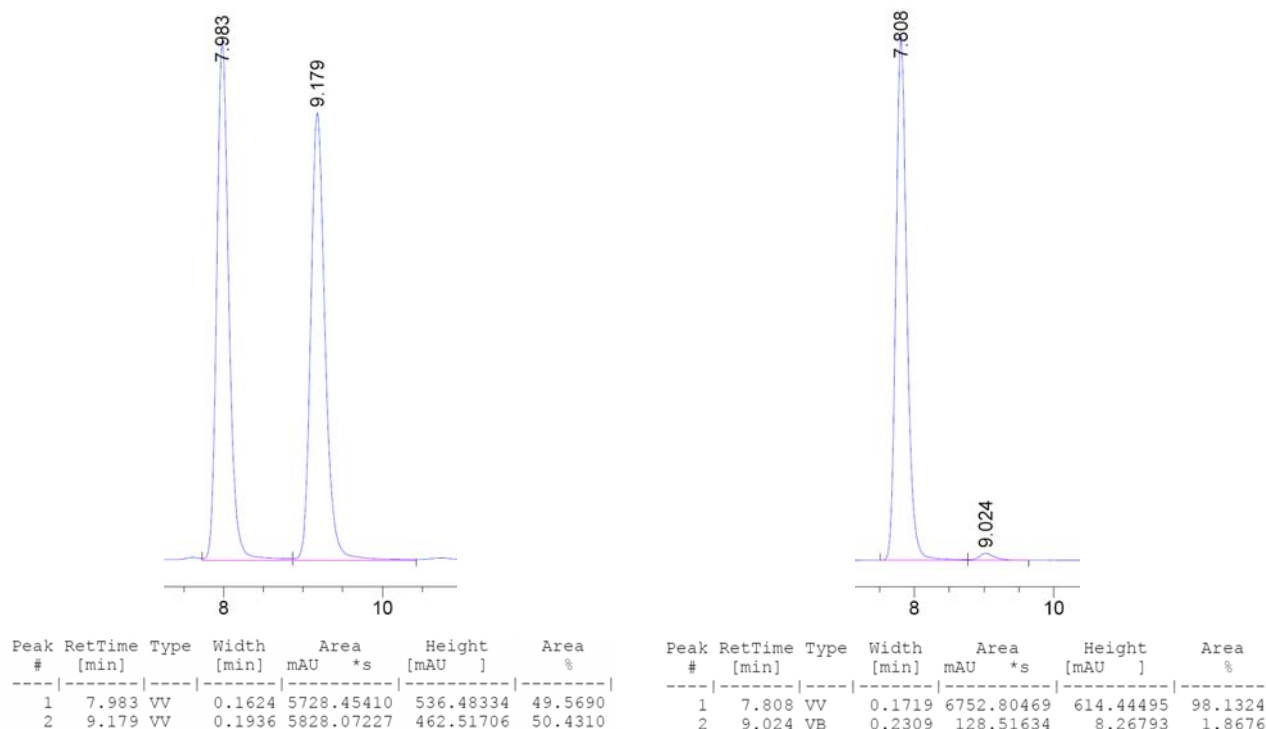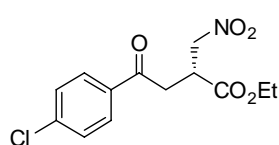

**(R)-Ethyl 4-(4-chlorophenyl)-2-(nitromethyl)-4-oxobutanoate (3l).**

Prepared according to the general procedure from **1l** (0.25 mmol), **2a** (1.00 mmol), **1** (0.0125 mmol) and xylenes (0.5 mL) at 25 °C for 6 h to provide the title compound as a colorless oil (96% yield, 97% ee).  $^1\text{H}$  NMR (600 MHz,  $\text{CDCl}_3$ )  $\delta$  (ppm) 7.91 (d,  $J = 9.0$  Hz, 2H), 7.47 (d,  $J = 8.4$  Hz, 2H), 4.86 (ABX,  $J_{\text{AB}} = 14.4$  Hz,  $J_{\text{AX}} = J_{\text{BX}} = 5.4$  Hz, 1H), 4.81 (ABX,  $J_{\text{AB}} = 14.4$  Hz,  $J_{\text{AX}} = J_{\text{BX}} = 5.4$  Hz, 1H), 4.25-4.20 (m, 2H), 3.76-3.72 (m, 1H), 3.59 (ABX,  $J_{\text{AB}} = 18.0$  Hz,  $J_{\text{AX}} = 4.8$  Hz,  $J_{\text{BX}} = 6.6$  Hz, 1H), 3.34 (ABX,  $J_{\text{AB}} = 18.0$  Hz,  $J_{\text{AX}} = 4.8$  Hz,  $J_{\text{BX}} = 6.6$  Hz, 1H), 1.26 (t,  $J = 7.2$  Hz, 3H);  $^{13}\text{C}$  NMR (150 MHz,  $\text{CDCl}_3$ )  $\delta$  (ppm) 195.3, 170.6, 140.2, 134.2, 129.4, 129.0, 74.7, 61.9, 38.3, 36.9, 13.9; *Anal. Calcd.* for  $\text{C}_{13}\text{H}_{14}\text{ClNO}_5$ : C, 52.10; H, 4.71; N, 4.67; Found: C, 52.15; H, 4.73; N, 4.55;  $[\alpha]_{\text{D}}^{25} = 4.65$  ( $c = 2.28$ ,  $\text{CHCl}_3$ ); the enantiomeric excess was determined by chiral HPLC (Chiralpak AD column: hexane/2-propanol = 70/30, 1 mL/min, 254 nm,  $t_{\text{major}} = 8.96$  min,  $t_{\text{minor}} = 10.37$  min.)

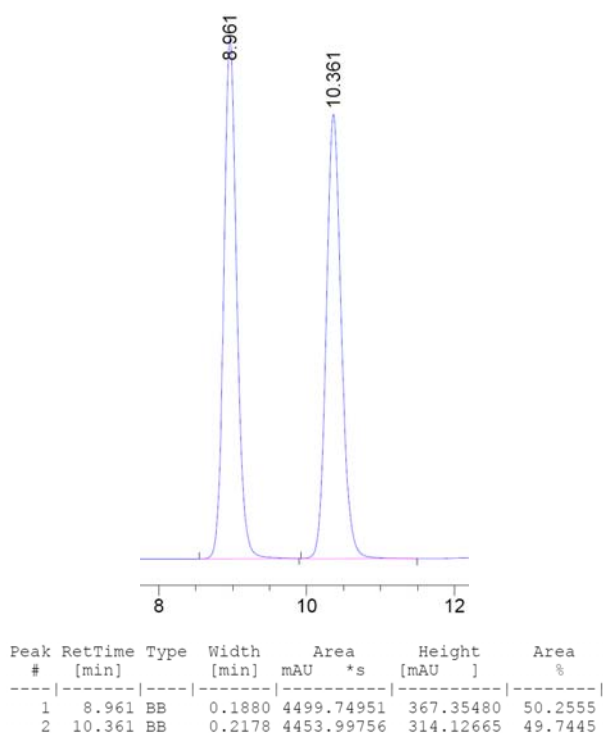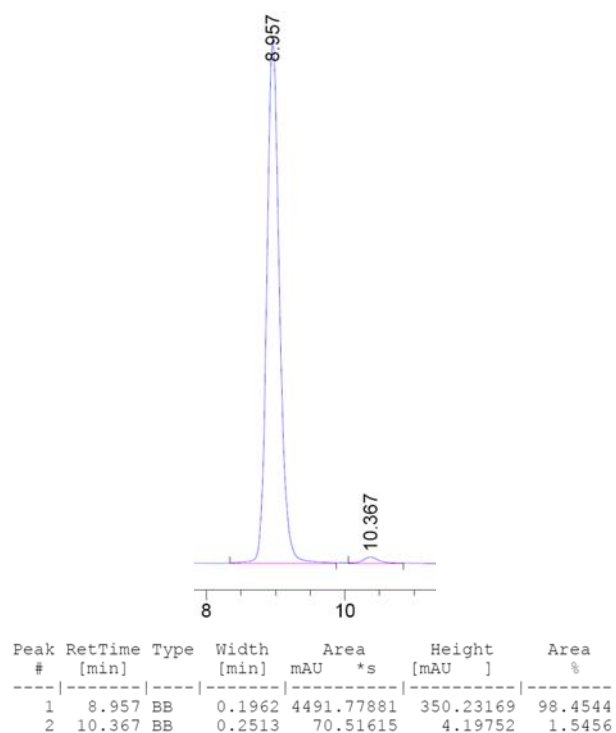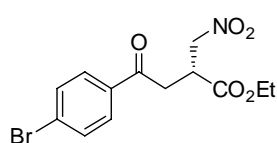

**(R)-Ethyl 4-(4-bromophenyl)-2-(nitromethyl)-4-oxobutanoate (3m).**

Prepared according to the general procedure from **1m** (0.25 mmol), **2a** (1.00 mmol), **1** (0.0125 mmol) and xylenes (0.5 mL) at 25 °C for 8 h to provide the title compound as a colorless oil (91% yield, 97% ee). <sup>1</sup>H NMR (600 MHz, CDCl<sub>3</sub>) δ (ppm) 7.82 (d, *J* = 8.4 Hz, 2H), 7.63 (d, *J* = 8.4 Hz, 2H), 4.86 (ABX, *J*<sub>AB</sub> = 14.4 Hz, *J*<sub>AX</sub> = *J*<sub>BX</sub> = 5.4 Hz, 1H), 4.81 (ABX, *J*<sub>AB</sub> = 14.4 Hz, *J*<sub>AX</sub> = *J*<sub>BX</sub> = 5.4 Hz, 1H), 4.25-4.19 (m, 2H), 3.76-

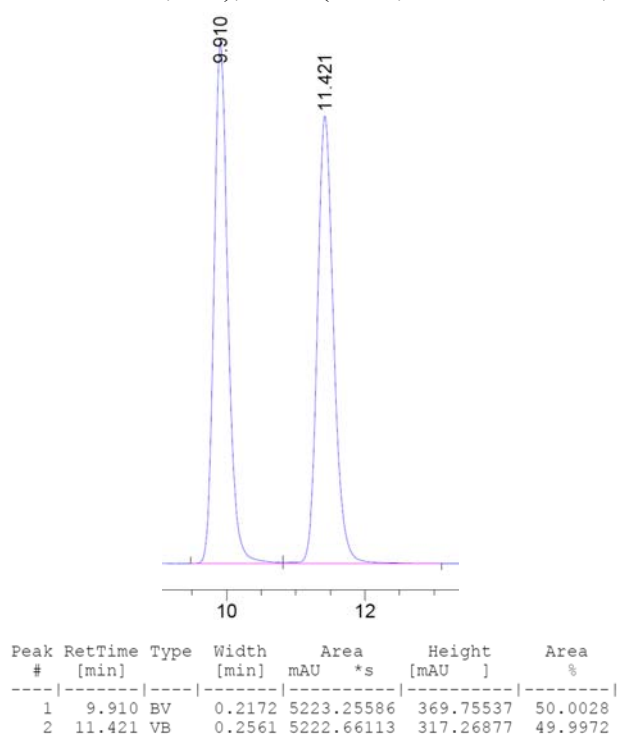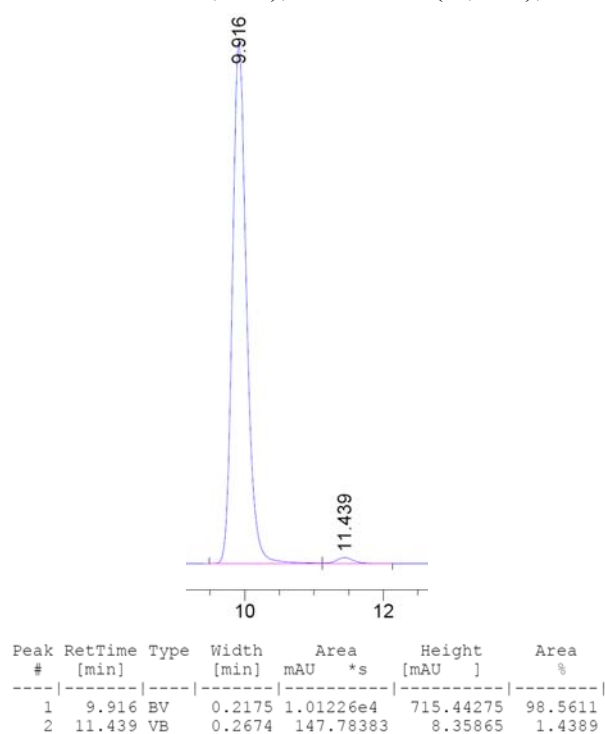

3.72 (m, 1H), 3.58 (ABX,  $J_{AB} = 18.6$  Hz,  $J_{AX} = 5.4$  Hz,  $J_{BX} = 6.6$  Hz, 1H), 3.33 (ABX,  $J_{AB} = 18.6$  Hz,  $J_{AX} = 5.4$  Hz,  $J_{BX} = 6.6$  Hz, 1H), 1.26 (t,  $J = 7.2$  Hz, 3H);  $^{13}\text{C}$  NMR (150 MHz,  $\text{CDCl}_3$ )  $\delta$  (ppm) 195.5, 170.1, 134.5, 132.0, 129.5, 129.0, 74.7, 61.9, 38.2, 36.8, 13.9; *Anal. Calcd.* for  $\text{C}_{13}\text{H}_{14}\text{BrNO}_5$ : C, 45.37; H, 4.10; N, 4.07; Found: C, 45.29; H, 4.17; N, 3.98;  $[\alpha]_{\text{D}}^{25} = 5.0$  ( $c = 1.0$ ,  $\text{CHCl}_3$ ); the enantiomeric excess was determined by chiral HPLC (Chiralpak AD column: hexane/2-propanol = 70/30, 1 mL/min, 254 nm,  $t_{\text{major}} = 9.92$  min,  $t_{\text{minor}} = 11.44$  min.)

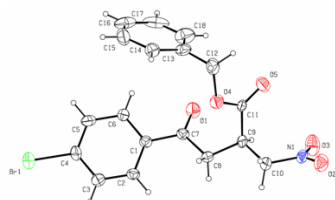

**(R)-Benzyl 4-(4-bromophenyl)-2-(nitromethyl)-4-oxobutanoate (3n).**

Prepared according to the general procedure from **1n** (0.50 mmol), **2a** (2.00 mmol), **I** (0.025 mmol) and xylenes (1.0 mL) at 25 °C for 10 h to provide the title compound as a white solid (85% yield, 97% ee).  $^1\text{H}$  NMR (600 MHz,  $\text{CDCl}_3$ )  $\delta$  (ppm) 7.79 (d,  $J = 8.4$  Hz, 2H), 7.61 (d,  $J = 8.4$  Hz, 2H), 7.35-7.26 (m, 5H), 5.18 (s, 2H), 4.86 (ABX,  $J_{AB} = 14.4$  Hz,

$J_{AX} = 4.8$  Hz,  $J_{BX} = 6.0$  Hz, 1H), 4.82 (ABX,  $J_{AB} = 14.4$  Hz,  $J_{AX} = 4.8$  Hz,  $J_{BX} = 6.0$  Hz, 1H), 3.82-3.78 (m, 1H), 3.58 (ABX,  $J_{AB} = 18.6$  Hz,  $J_{AX} = 5.4$  Hz,  $J_{BX} = 6.6$  Hz, 1H), 3.34 (ABX,  $J_{AB} = 18.6$  Hz,  $J_{AX} = 5.4$  Hz,  $J_{BX} = 6.6$  Hz, 1H);  $^{13}\text{C}$  NMR (150 MHz,  $\text{CDCl}_3$ )  $\delta$  (ppm) 195.4, 170.5, 134.9, 134.5, 132.0, 129.0, 128.6, 128.5, 128.2, 74.6, 67.6, 38.3, 36.8; *Anal. Calcd.* for  $\text{C}_{18}\text{H}_{16}\text{BrNO}_5$ : C, 53.22; H, 3.97; N, 3.45; Found: C, 53.26; H, 3.89; N, 3.37;  $[\alpha]_{\text{D}}^{16} = -6.3$  ( $c = 0.89$ ,  $\text{CH}_2\text{Cl}_2$ ); the enantiomeric excess was determined by chiral HPLC (Chiralpak AD column: hexane/2-propanol = 80/20, 1 mL/min, 254 nm,  $t_{\text{major}} = 18.82$  min,  $t_{\text{minor}} = 21.92$  min.)

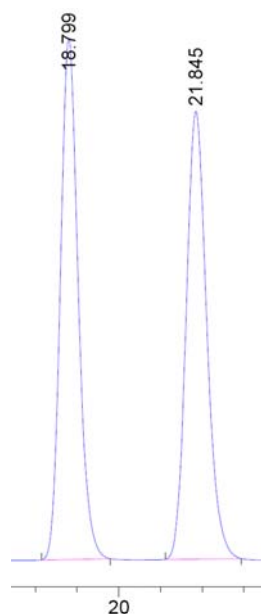

| Peak # | RetTime [min] | Type | Width [min] | Area mAU   | Area *s | Height [mAU] | Area %  |
|--------|---------------|------|-------------|------------|---------|--------------|---------|
| 1      | 18.799        | BB   | 0.4544      | 1770.99316 |         | 60.10022     | 50.0679 |
| 2      | 21.845        | BB   | 0.5271      | 1766.18652 |         | 51.64923     | 49.9321 |

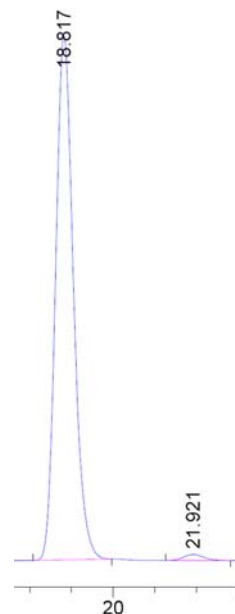

| Peak # | RetTime [min] | Type | Width [min] | Area mAU  | Area *s | Height [mAU] | Area %  |
|--------|---------------|------|-------------|-----------|---------|--------------|---------|
| 1      | 18.817        | PB   | 0.4566      | 2.59765e4 |         | 876.08905    | 98.7013 |
| 2      | 21.921        | BB   | 0.5253      | 341.79984 |         | 10.15180     | 1.2987  |

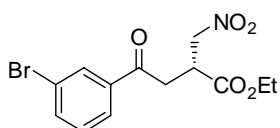

**(R)-Ethyl 4-(3-bromophenyl)-2-(nitromethyl)-4-oxobutanoate (3o).**

Prepared according to the general procedure from **1n** (0.50 mmol), **2a** (2.00 mmol), **I** (0.025 mmol) and xylenes (1.0 mL) at 25 °C for 4 h to provide the

title compound as a colorless oil (90% yield, 97% ee).  $^1\text{H}$  NMR (600 MHz,  $\text{CDCl}_3$ )  $\delta$  (ppm) 8.09 (s, 1H), 7.89 (d,  $J = 7.8$  Hz, 1H), 7.73 (d,  $J = 7.8$  Hz, 1H), 7.38 (t,  $J = 7.8$  Hz, 1H), 4.86 (ABX,  $J_{\text{AB}} = 14.4$  Hz,  $J_{\text{AX}} = J_{\text{BX}} = 5.4$  Hz, 1H), 4.81 (ABX,  $J_{\text{AB}} = 14.4$  Hz,  $J_{\text{AX}} = J_{\text{BX}} = 5.4$  Hz, 1H), 4.25-4.20 (m, 2H), 3.77-3.73 (m, 1H), 3.59 (ABX,  $J_{\text{AB}} = 18.0$  Hz,  $J_{\text{AX}} = 6.0$  Hz,  $J_{\text{BX}} = 6.6$  Hz, 1H), 3.35 (ABX,  $J_{\text{AB}} = 18.0$  Hz,  $J_{\text{AX}} = 6.0$  Hz,  $J_{\text{BX}} = 6.6$  Hz, 1H), 1.26 (t,  $J = 7.2$  Hz, 3H);  $^{13}\text{C}$  NMR (150 MHz,  $\text{CDCl}_3$ )  $\delta$  (ppm) 195.2, 170.5, 137.5, 136.6, 131.1, 130.3, 126.6, 123.1, 74.6, 61.9, 38.2, 37.0, 13.9; *Anal. Calcd.* for  $\text{C}_{13}\text{H}_{14}\text{BrNO}_5$ : C, 45.37; H, 4.10; N, 4.07; Found: C, 45.33; H, 4.21; N, 4.00;  $[\alpha]_{\text{D}}^{25} = -2.5$  ( $c = 2.5$ ,  $\text{CHCl}_3$ ); the enantiomeric excess was determined by chiral HPLC (Chiralpak OD column: hexane/2-propanol = 80/20, 1 mL/min, 254 nm,  $t_{\text{major}} = 12.40$  min,  $t_{\text{minor}} = 15.79$  min.)

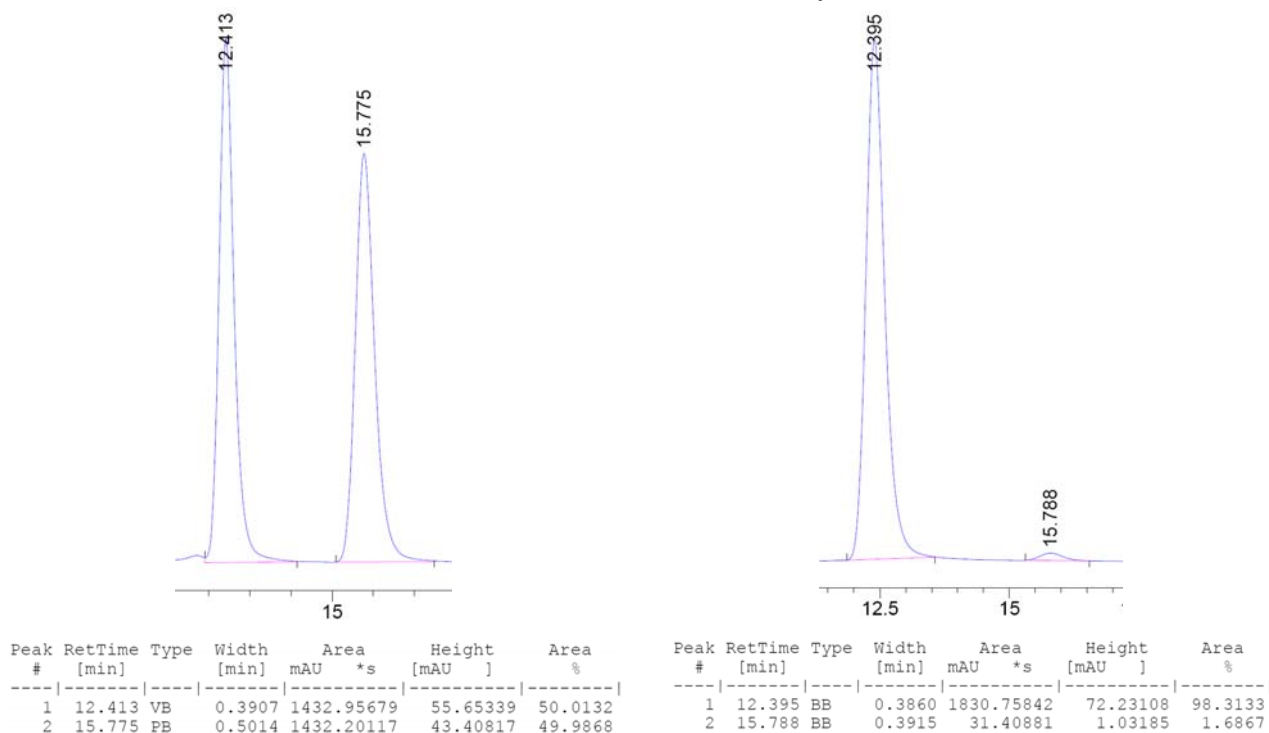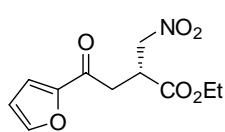

**(R)-Ethyl 4-(furan-2-yl)-2-(nitromethyl)-4-oxobutanoate (3p).** Prepared

according to the general procedure from **1n** (0.50 mmol), **2a** (2.00 mmol), **I** (0.025 mmol) and xylenes (1.0 mL) at 25 °C for 6 h to provide the title compound as a colorless oil (92% yield, 97% ee).  $^1\text{H}$  NMR (600 MHz,  $\text{CDCl}_3$ )  $\delta$  (ppm) 7.76 (br, 1H), 7.69 (d,  $J = 4.8$  Hz, 1H), 7.15 (br, 1H), 4.85 (ABX,  $J_{\text{AB}} = 14.4$  Hz,  $J_{\text{AX}} = 6.0$  Hz,  $J_{\text{BX}} = 5.4$  Hz, 1H), 4.80 (ABX,  $J_{\text{AB}} = 14.4$  Hz,  $J_{\text{AX}} = 6.0$  Hz,  $J_{\text{BX}} = 5.4$  Hz, 1H), 4.24-4.18 (m, 2H), 3.74-3.71 (m, 1H), 3.55 (ABX,  $J_{\text{AB}} = 18.0$  Hz,  $J_{\text{AX}} = 5.4$  Hz,  $J_{\text{BX}} = 6.6$  Hz, 1H), 3.32 (ABX,  $J_{\text{AB}} = 18.0$  Hz,  $J_{\text{AX}} = 5.4$  Hz,  $J_{\text{BX}} = 6.6$  Hz, 1H), 1.24 (t,  $J = 7.2$  Hz, 3H);  $^{13}\text{C}$  NMR (150 MHz,  $\text{CDCl}_3$ )  $\delta$  (ppm) 189.2, 170.6, 142.8, 134.5, 132.6, 128.3, 74.6, 61.9, 38.3, 37.4, 13.9; *Anal. Calcd.* for  $\text{C}_{11}\text{H}_{13}\text{NO}_6$ : C, 51.77; H, 5.13; N, 5.49; Found: C, 51.90; H, 5.08; N, 5.37;  $[\alpha]_{\text{D}}^{25} = -1.3$  ( $c = 2.6$ ,  $\text{CHCl}_3$ ); the enantiomeric excess was determined by chiral HPLC (Chiralpak OD column: hexane/2-propanol = 80/20, 1 mL/min, 254 nm,  $t_{\text{major}} = 14.72$  min,  $t_{\text{minor}} = 22.05$  min.)

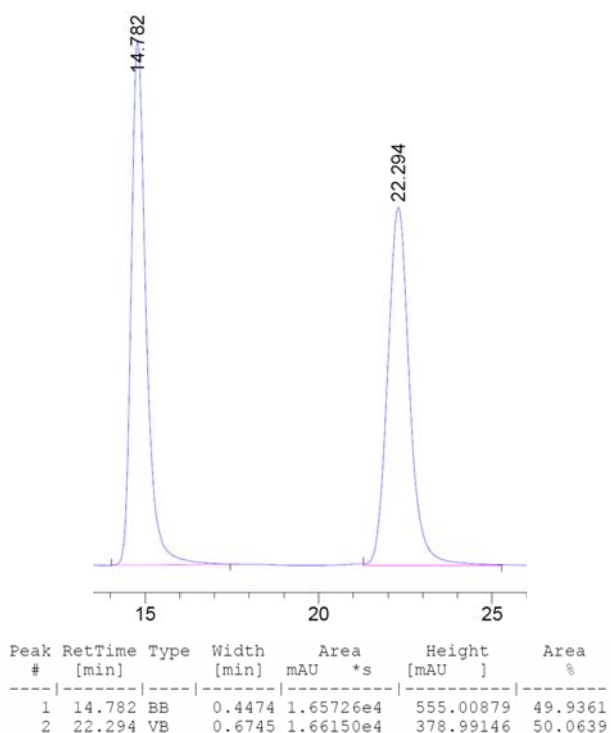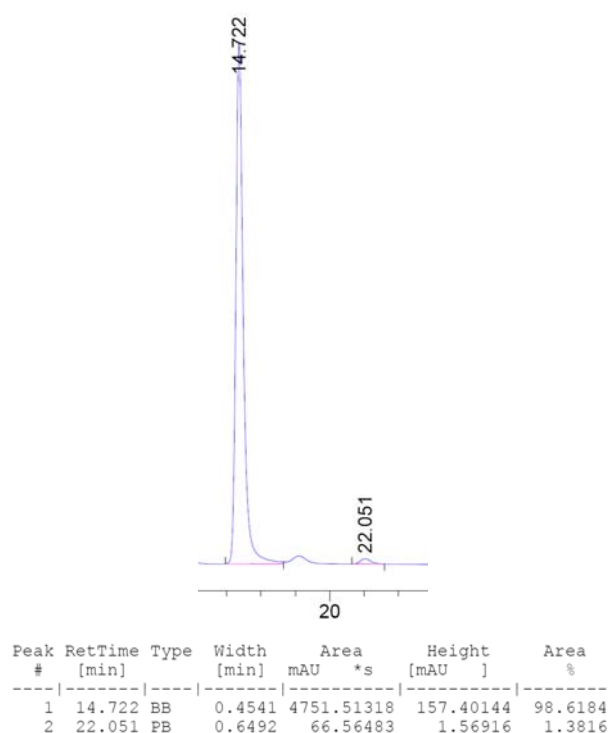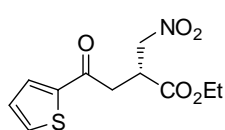

**(R)-Ethyl 2-(nitromethyl)-4-oxo-4-(thiophen-2-yl)butanoate (3q).** Prepared according to the general procedure from **1n** (0.50 mmol), **2a** (2.00 mmol), **I** (0.025 mmol) and xylenes (1.0 mL) at 25 °C for 4 h to provide the title compound as a colorless oil (86% yield, 98% ee). <sup>1</sup>H NMR (600 MHz, CDCl<sub>3</sub>) δ

(ppm) 7.77 (d, *J* = 3.6 Hz, 1H), 7.70 (d, *J* = 4.8 Hz, 1H), 7.16 (t, *J* = 3.6 Hz, 1H), 4.86 (ABX, *J*<sub>AB</sub> = 14.4 Hz, *J*<sub>AX</sub> = *J*<sub>BX</sub> = 5.4 Hz, 1H), 4.81 (ABX, *J*<sub>AB</sub> = 14.4 Hz, *J*<sub>AX</sub> = *J*<sub>BX</sub> = 5.4 Hz, 1H), 4.25-4.19

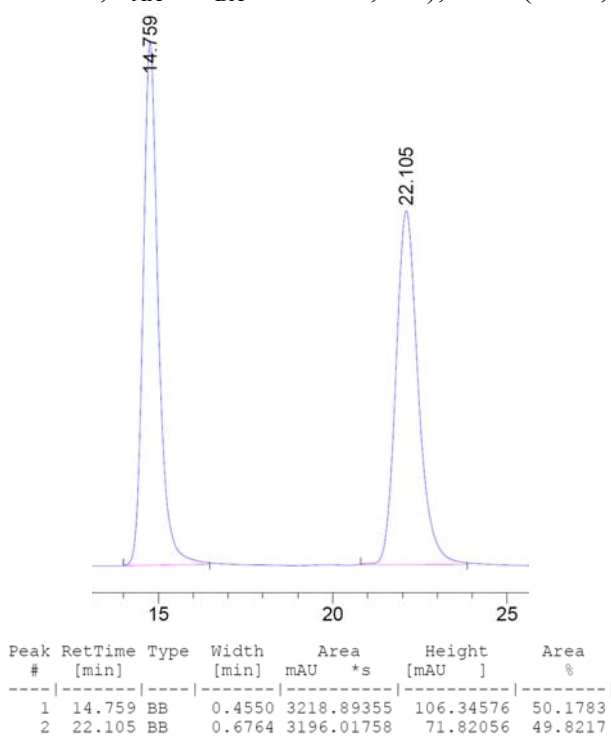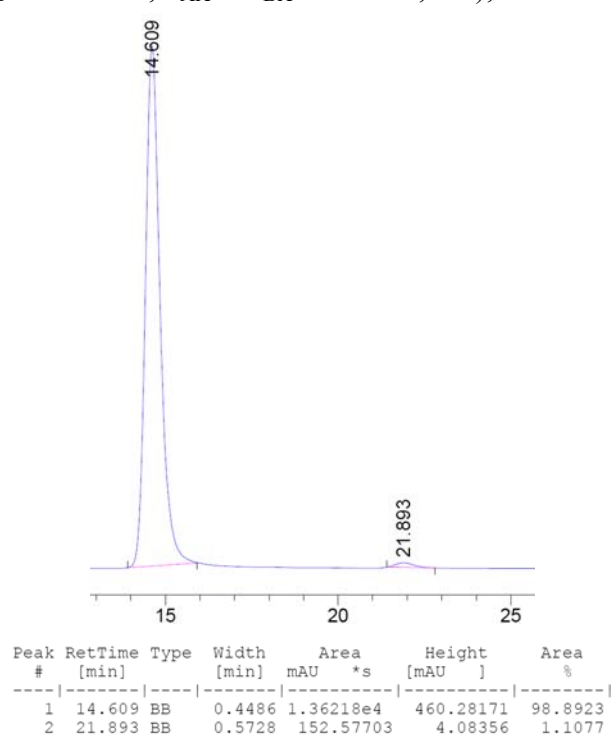

(m, 2H), 3.75-3.71 (m, 1H), 3.55 (ABX,  $J_{AB} = 18.0$  Hz,  $J_{AX} = 5.4$  Hz,  $J_{BX} = 6.6$  Hz, 1H), 3.33 (ABX,  $J_{AB} = 18.0$  Hz,  $J_{AX} = 5.4$  Hz,  $J_{BX} = 6.6$  Hz, 1H), 1.25 (t,  $J = 7.2$  Hz, 3H);  $^{13}\text{C}$  NMR (150 MHz,  $\text{CDCl}_3$ )  $\delta$  (ppm) 189.2, 170.6, 142.8, 134.5, 132.6, 128.3, 74.6, 61.9, 38.3, 37.3, 13.9; *Anal. Calcd.* for  $\text{C}_{11}\text{H}_{13}\text{NO}_5\text{S}$ : C, 48.70; H, 4.83; N, 5.16; Found: C, 48.80; H, 4.76; N, 5.03;  $[\alpha]_{\text{D}}^{25} = -4.7$  ( $c = 2.1$ ,  $\text{CHCl}_3$ ); the enantiomeric excess was determined by chiral HPLC (Chiralpak OD column: hexane/2-propanol = 80/20, 1 mL/min, 254 nm,  $t_{\text{major}} = 14.61$  min,  $t_{\text{minor}} = 21.89$  min.)

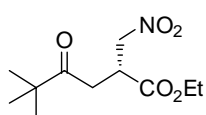

**(R)-Ethyl 5,5-dimethyl-2-(nitromethyl)-4-oxohexanoate (3r).** Prepared according to the general procedure from **3r** (0.25 mmol), **2a** (1.00 mmol), **I** (0.025 mmol) and xylenes (0.5 mL) at 25 °C for 4 h to provide the title compound as a colorless oil (47% yield, 80% ee).  $^1\text{H}$  NMR (600 MHz,  $\text{CDCl}_3$ )  $\delta$  (ppm) 4.76 (ABX,  $J_{AB} = 14.4$  Hz,  $J_{AX} = 6.0$  Hz,  $J_{BX} = 5.4$  Hz, 1H), 4.67 4.76 (ABX,  $J_{AB} = 14.4$  Hz,  $J_{AX} = 6.0$  Hz,  $J_{BX} = 5.4$  Hz, 1H), 4.21-4.15 (m, 2H), 3.57-3.53 (m, 1H), 3.08 (ABX,  $J_{AB} = 18.6$  Hz,  $J_{AX} = 5.4$  Hz,  $J_{BX} = 6.6$  Hz, 1H), 2.91 (ABX,  $J_{AB} = 18.6$  Hz,  $J_{AX} = 5.4$  Hz,  $J_{BX} = 6.6$  Hz, 1H), 1.26 (t,  $J = 7.2$  Hz, 3H), 1.17 (s, 9H);  $^{13}\text{C}$  NMR (150 MHz,  $\text{CDCl}_3$ )  $\delta$  (ppm) 212.7, 170.8, 74.8, 61.7, 44.0, 38.2, 35.3, 26.3, 14.0; *Anal. Calcd.*  $\text{C}_{11}\text{H}_{19}\text{NO}_5$ : C, 53.87; H, 7.81; N, 5.71; Found: C, 53.81; H, 7.73; N, 5.63; the enantiomeric excess was determined by chiral HPLC (Chiralpak AD column: hexane/2-propanol = 80/20, 1 mL/min, 210 nm,  $t_{\text{major}} = 14.61$  min,  $t_{\text{minor}} = 21.89$  min.)

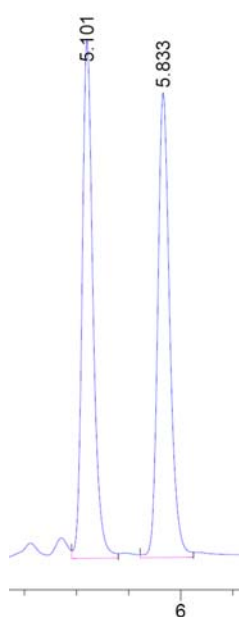

| Peak # | RetTime [min] | Type | Width [min] | Area mAU   | Area *s | Height [mAU] | Area %  |
|--------|---------------|------|-------------|------------|---------|--------------|---------|
| 1      | 5.101         | VV   | 0.1111      | 2512.42676 |         | 345.20041    | 50.1901 |
| 2      | 5.833         | VV   | 0.1230      | 2493.39624 |         | 309.76343    | 49.8099 |

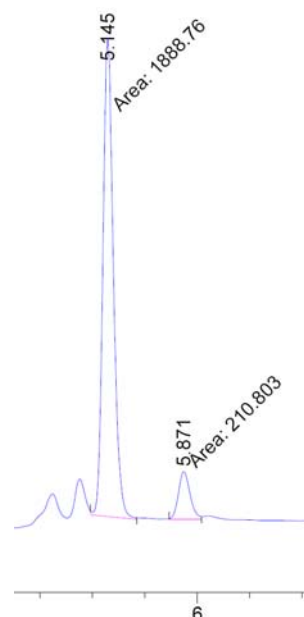

| Peak # | RetTime [min] | Type | Width [min] | Area mAU   | Area *s | Height [mAU] | Area %  |
|--------|---------------|------|-------------|------------|---------|--------------|---------|
| 1      | 5.145         | MM   | 0.1152      | 1888.75977 |         | 273.32944    | 89.9597 |
| 2      | 5.871         | MM   | 0.1283      | 210.80342  |         | 27.37632     | 10.0403 |

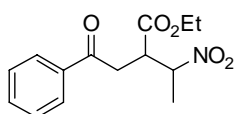

**Ethyl 2-(1-nitroethyl)-4-oxo-4-phenylbutanoate (3s).** Prepared according to the general procedure from **1a** (0.25 mmol), **2b** (1.00 mmol), **I** (0.0125 mmol) and xylenes (0.5 mL) at 25 °C for 4 h to provide the title compound as a colorless oil (89% yield, d.r. = 65 : 35, 97 and 96% ee).  $^1\text{H}$  NMR (600 MHz,  $\text{CDCl}_3$ )  $\delta$  (ppm) 7.96 (d,  $J = 7.8$  Hz, 2H), 7.48 (t,  $J = 8.4$  Hz, 1H), 7.48 (t,  $J = 9.6$  Hz, 2H), 5.07-

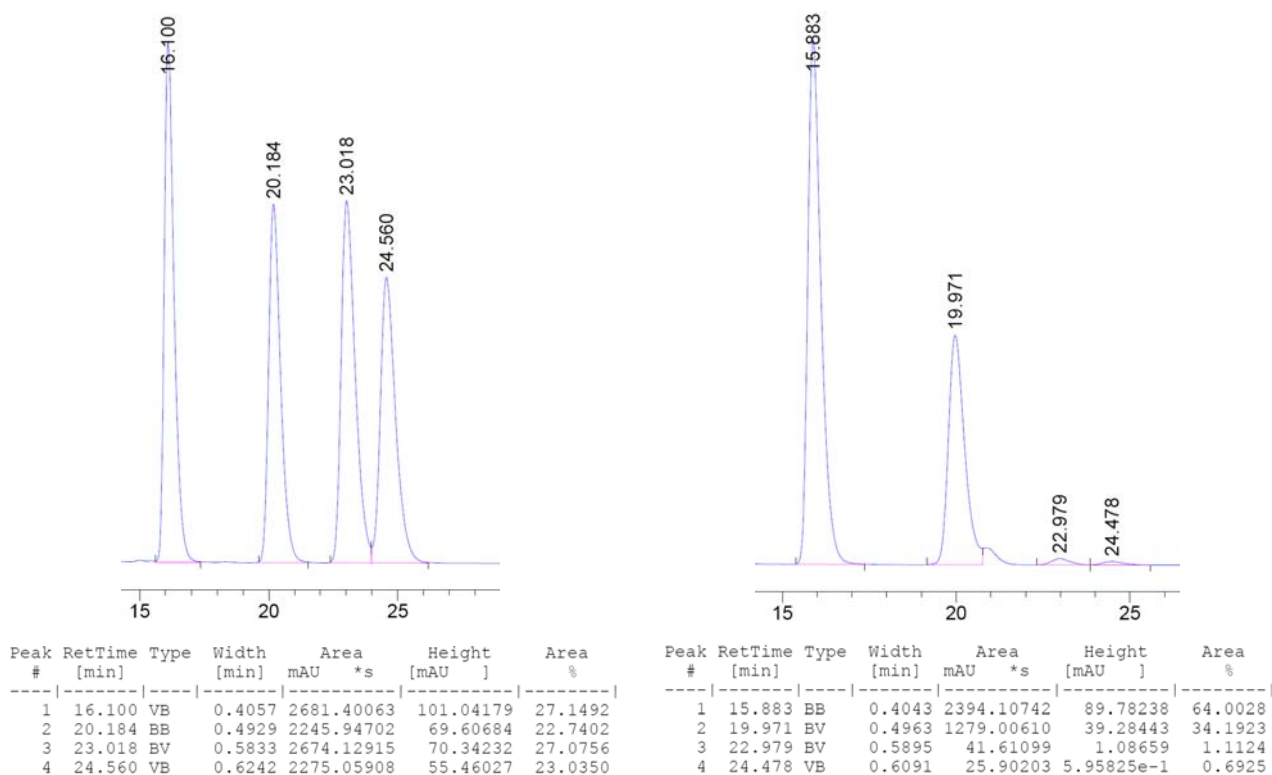

5.02 (m, 1H), 4.24-4.17 (m, 2H), 3.82-3.79 (m, 1H), 3.67-3.56 (m, 2H), 3.29-3.05 (m, 1H), 1.63-1.62 (m, 3H), 1.27-1.23 (m, 3H);  $^{13}\text{C}$  NMR (150 MHz,  $\text{CDCl}_3$ )  $\delta$  (ppm) 196.5, 170.6, 136.0, 135.9, 133.6, 128.7, 128.1, 128.0, 82.7, 82.3, 61.7, 44.3, 43.7, 36.0, 16.8, 13.9; *Anal. Calcd.* for  $\text{C}_{14}\text{H}_{17}\text{NO}_5$ : C, 60.21; H, 6.14; N, 5.02; Found: C, 60.27; H, 6.08; N, 4.96;  $[\alpha]_{\text{D}}^{25} = 7.2$  (c = 2.4,  $\text{CHCl}_3$ ); the enantiomeric excess was determined by chiral HPLC (Chiralpak OJ column: hexane/2-propanol = 80/20, 1 mL/min, 254 nm,  $t_{\text{major}} = 15.88$  min,  $t_{\text{minor}} = 22.98$  min and  $t_{\text{major}} = 19.97$  min,  $t_{\text{minor}} = 24.48$  min.)

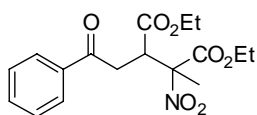

**Diethyl 2-methyl-2-nitro-3-(2-oxo-2-phenylethyl)succinate (3t).** Prepared according to the general procedure from **1a** (0.25 mmol), **2c** (1.00 mmol), **1** (0.0125 mmol) and xylenes (0.5 mL) at 25 °C for 4 h to provide the title compound as a colorless oil (99% yield, d.r. = 82 : 18, 68 and 92% ee).  $^1\text{H}$  NMR (600 MHz,  $\text{CDCl}_3$ )  $\delta$  (ppm) 7.96 (d,  $J = 7.2$  Hz, 2H), 7.59 (t,  $J = 7.2$  Hz, 1H), 7.48 (t,  $J = 7.2$  Hz, 2H), 4.31-4.24 (m, 4H), 4.17-4.14 (m, 2H), 3.71-3.66 (m, 1H), 3.25 (d,  $J = 17.4$  Hz, 1H), 1.95 (s, 3H), 1.32-1.29 (m, 3H), 1.23-1.21 (m, 3H);  $^{13}\text{C}$  NMR (150 MHz,  $\text{CDCl}_3$ )  $\delta$  (ppm) 196.3, 169.8, 165.9, 135.9, 133.5, 128.6, 128.0, 127.9, 92.8, 63.3, 61.8, 45.7, 37.1, 20.2, 13.8, 13.6; *Anal. Calcd.* for  $\text{C}_{17}\text{H}_{21}\text{NO}_7$ : C, 58.11; H, 6.02; N, 3.99; Found: C, 58.15; H, 6.17; N, 3.89; the enantiomeric excess was determined by chiral HPLC (Chiralpak OJ column: hexane/2-propanol = 80/20, 1 mL/min, 254 nm,  $t_{\text{minor}} = 14.69$  min,  $t_{\text{major}} = 24.65$  min, and  $t_{\text{minor}} = 17.95$  min,  $t_{\text{major}} = 28.00$  min.)

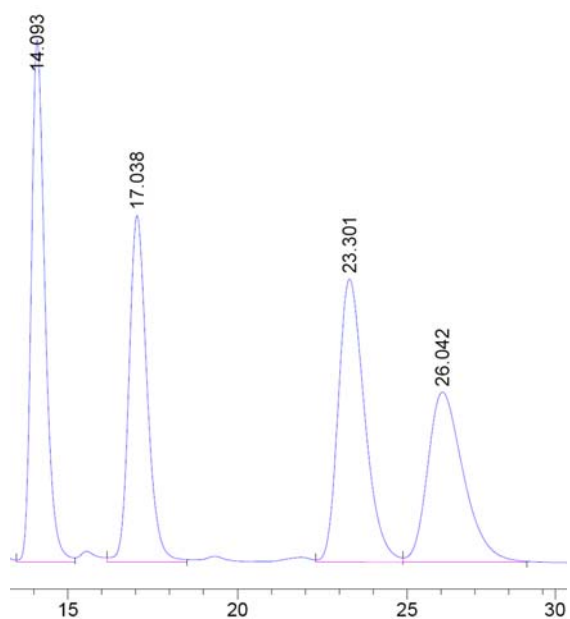

| Peak # | RetTime [min] | Type | Width [min] | Area mAU *s | Height [mAU] | Area %  |
|--------|---------------|------|-------------|-------------|--------------|---------|
| 1      | 14.093        | VV   | 0.4296      | 1254.71460  | 44.67906     | 26.5211 |
| 2      | 17.038        | VB   | 0.5650      | 1095.34521  | 29.64609     | 23.1525 |
| 3      | 23.301        | VV   | 0.8363      | 1311.34033  | 24.19097     | 27.7180 |
| 4      | 26.042        | VB   | 1.1121      | 1069.60718  | 14.58085     | 22.6084 |

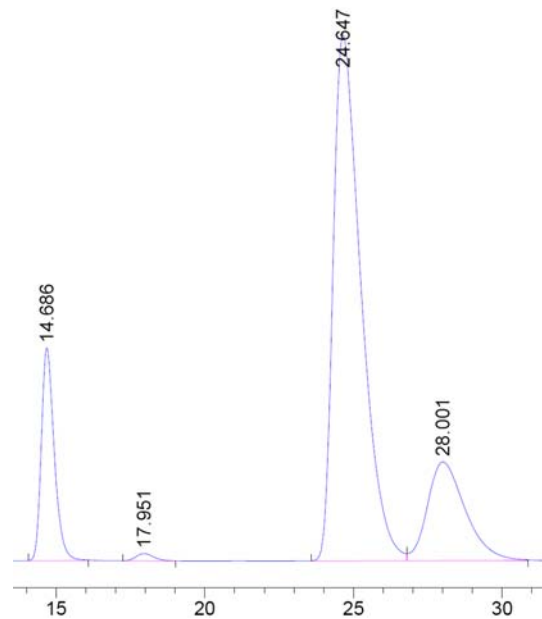

| Peak # | RetTime [min] | Type | Width [min] | Area mAU *s | Height [mAU] | Area %  |
|--------|---------------|------|-------------|-------------|--------------|---------|
| 1      | 14.686        | BB   | 0.4647      | 953.74664   | 31.43013     | 12.9667 |
| 2      | 17.951        | BB   | 0.6286      | 44.86840    | 1.09033      | 0.6100  |
| 3      | 24.647        | BV   | 0.9874      | 5062.63428  | 77.68647     | 68.8293 |
| 4      | 28.001        | VB   | 1.3322      | 1294.09692  | 14.58433     | 17.5940 |

#### 4. Synthesis of functionalized $\beta^2$ -amino acid derivatives

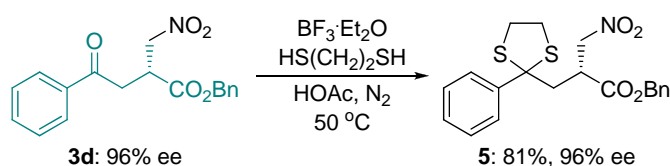

**(R)-Benzyl 3-nitro-2-[(2-phenyl-1,3-dithiolan-2-yl)methyl] propanoate (5).** To an oven-dried three-necked flash equipped with a condenser was sequentially added (R)-benzyl 2-(nitromethyl)-4-oxo-4-phenylbutanoate (**3d**, 1.10 g), 1,2-ethanedithiol (1.5 mL), and HOAc (8.0 mL) was added  $\text{BF}_3\cdot\text{Et}_2\text{O}$  (1.5 mL) under nitrogen at room temperature. The mixture was then stirred at 50 °C under nitrogen for 48 h. Then HOAc was removed under high vacuum at 40 °C and the residue was purified by flash column chromatography to afford **5** (PE/EtOAc = 7/1, 1.10 g, 81%, 96% ee) as a pale yellow oil.  $^1\text{H}$  NMR (600 MHz,  $\text{CDCl}_3$ )  $\delta$  (ppm) 7.65 (d,  $J = 7.2$  Hz, 2H), 7.38-7.34 (m, 3H), 7.33-7.30 (m, 4H), 7.27-7.24 (m, 1H), 5.08 (q,  $J = 12.0$  Hz, 2H), 4.56 (ABX,  $J_{\text{AB}} = 14.4$  Hz,  $J_{\text{AX}} = 7.8$  Hz,  $J_{\text{BX}} = 4.2$  Hz, 1H), 4.49 (ABX,  $J_{\text{AB}} = 14.4$  Hz,  $J_{\text{AX}} = 7.8$  Hz,  $J_{\text{BX}} = 4.2$  Hz, 1H), 3.39-3.33 (m, 3H), 3.28-3.25 (m, 2H), 2.99 (ABX,  $J_{\text{AB}} = 15.0$  Hz,  $J_{\text{AX}} = J_{\text{BX}} = 5.4$  Hz, 1H), 2.39 (ABX,  $J_{\text{AB}} = 15.0$  Hz,  $J_{\text{AX}} = J_{\text{BX}} = 5.4$  Hz, 1H);  $^{13}\text{C}$  NMR (150 MHz,  $\text{CDCl}_3$ )  $\delta$  (ppm) 171.41, 143.6, 135.0, 128.4, 128.3, 128.1, 127.6, 126.8, 75.6, 72.9, 67.3, 43.5, 41.9, 39.5, 39.2; MS (EI)  $m/z$  403 ( $\text{M}^+$ ); *Anal. Calcd.* for  $\text{C}_{20}\text{H}_{21}\text{NO}_4\text{S}_2$ : C, 59.53; H, 5.25; N, 3.47; Found: C, 59.61; H, 5.23; N, 3.40; the enantiomeric excess was determined by chiral HPLC (Chiralpak AD column: hexane/2-propanol = 80/20, 1 mL/min, 210 nm,  $t_{\text{minor}} = 13.53$  min,  $t_{\text{major}} = 14.93$  min.)

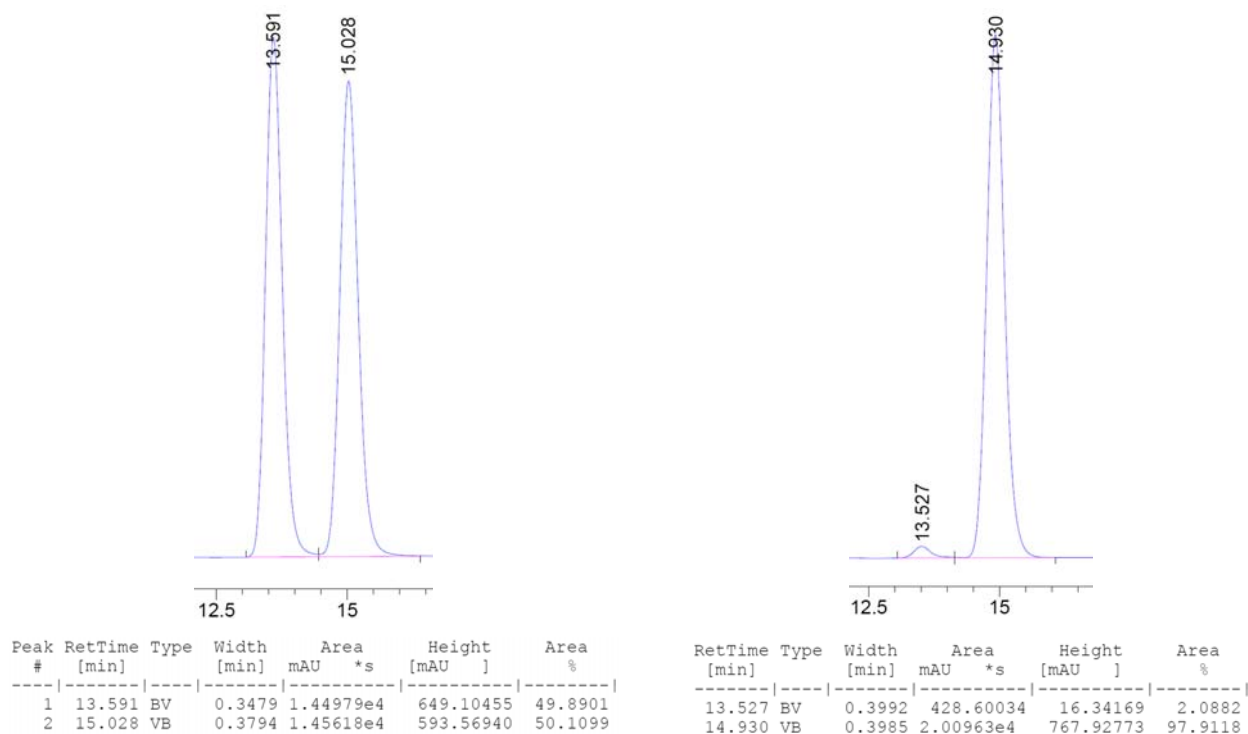

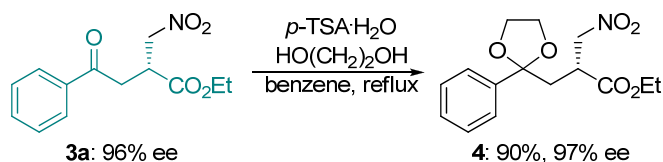

**(R)-Ethyl 3-nitro-2-((2-phenyl-1,3-dioxolan-2-yl)methyl)propanoate (4).** To an oven-dried three-necked flash equipped with a water separator was sequentially charged with (*R*)-ethyl 2-(nitromethyl)-4-oxo-4-phenylbutanoate (**3a**, 0.56 g), benzene (25 mL) and *p*-TSA·H<sub>2</sub>O (80 mg). The mixture was then heated to reflux under nitrogen for 24 h. After cooling, the reaction system was diluted with ethyl acetate (50 mL), washed with sat. NaHCO<sub>3</sub> and dried over MgSO<sub>4</sub>. Suction filtration and concentration afforded the residue, which was purified by flash column chromatography to obtain the desired product **4** (PE/EtOAc = 7/1, 0.56 g, 94%, 97% ee) as a colorless oil. <sup>1</sup>H NMR (600 MHz, CDCl<sub>3</sub>) δ (ppm) 7.44 (br, 1H), 7.43 (br, 1H), 7.37-7.32 (m, 3H), 4.82 (ABX, *J*<sub>AB</sub> = 14.4 Hz, *J*<sub>AX</sub> = 9.0 Hz, *J*<sub>BX</sub> = 4.2 Hz, 1H), 4.74 (ABX, *J*<sub>AB</sub> = 14.4 Hz, *J*<sub>AX</sub> = 9.0 Hz, *J*<sub>BX</sub> = 4.2 Hz, 1H), 4.22-4.13 (m, 2H), 4.06-3.98 (m, 2H), 3.79-3.71 (m, 2H), 3.44-3.40 (m, 1H), 2.44 (ABX, *J*<sub>AB</sub> = 15.0 Hz, *J*<sub>AX</sub> = 4.8 Hz, *J*<sub>BX</sub> = 7.8 Hz, 1H), 2.16 (ABX, *J*<sub>AB</sub> = 15.0 Hz, *J*<sub>AX</sub> = 4.8 Hz, *J*<sub>BX</sub> = 7.8 Hz, 1H), 1.27 (t, *J* = 7.2 Hz, 3H); <sup>13</sup>C NMR (150 MHz, CDCl<sub>3</sub>) δ (ppm) 171.9, 141.3, 128.3, 125.4, 125.3, 75.1, 61.3, 38.8, 38.6, 13.9; MS (EI) *m/z* 413 (M<sup>+</sup>); *Anal. Calcd.* for C<sub>23</sub>H<sub>27</sub>NO<sub>6</sub>: C, 66.81; H, 6.58; N, 3.39; Found: C, 66.89; H, 6.38; N, 3.27; the enantiomeric excess was determined by chiral HPLC (Chiralpak OD column: hexane/2-propanol = 90/10, 1 mL/min, 210 nm, *t*<sub>minor</sub> = 12.48 min, *t*<sub>major</sub> = 14.63 min.)

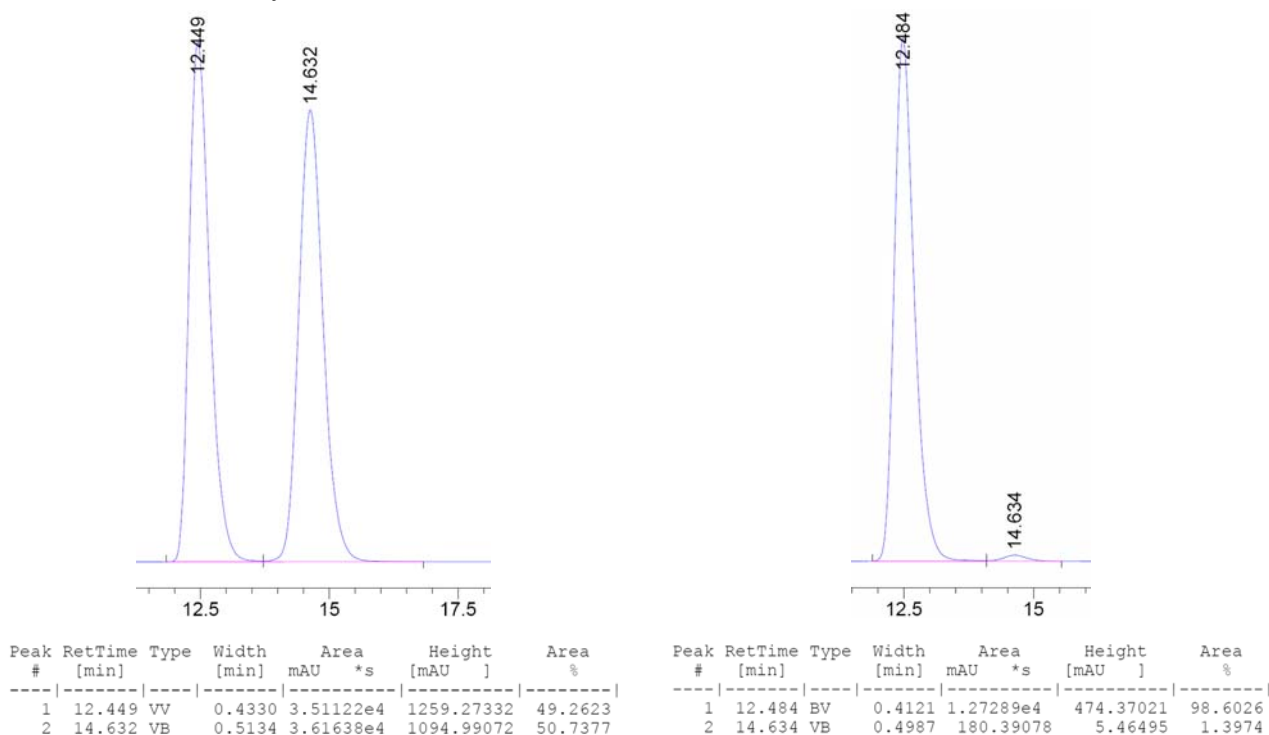

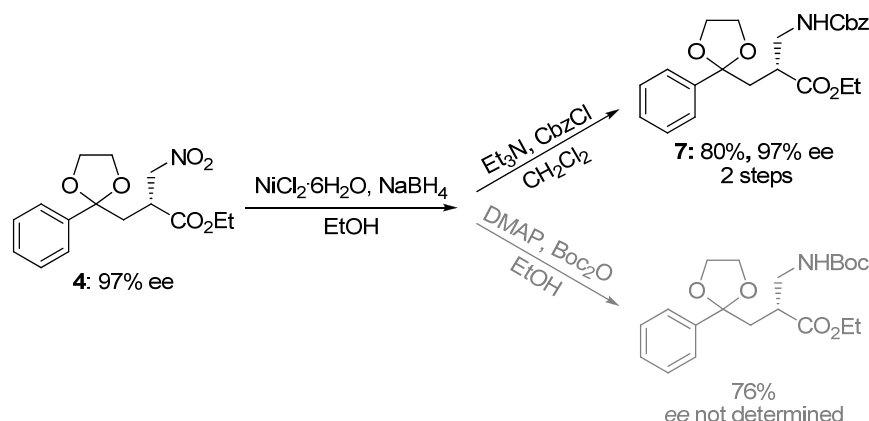

**(R)-Ethyl 3-(benzyloxycarbonylamino)-2-((2-phenyl-1,3-dioxolan-2-yl)methyl) propanoate (7).**

NaBH<sub>4</sub> (1.35 g) was added slowly in portionwise to a stirred solution of **4** (1.10 g) and NiCl<sub>2</sub>•6H<sub>2</sub>O (0.98 g) in EtOH (20 mL) at 0 °C. The reaction was stirred at 0 °C for 0.5 h before quenched with saturated aqueous NH<sub>4</sub>Cl (50 mL). The mixture was diluted with CH<sub>2</sub>Cl<sub>2</sub> (40 mL), extracted with CH<sub>2</sub>Cl<sub>2</sub> (3 × 40 mL), dried over MgSO<sub>4</sub>. Suction filtration over Celite and concentration *in vacuo* afforded the crude amine, which was dissolved in 20 mL of freshly distilled CH<sub>2</sub>Cl<sub>2</sub>. Et<sub>3</sub>N (0.7 mL) was added and the mixture was cooled by an ice-bath for 15 min. Then benzyl chloroformate (0.55 mL) was added dropwise via syringe over 15 min. 3 h later, the reaction was quenched with saturated aqueous NH<sub>4</sub>Cl and extracted with CH<sub>2</sub>Cl<sub>2</sub>. The combined organic phase was dried over MgSO<sub>4</sub>. The residue obtained after filtration and concentration was subjected to flash chromatography to obtain the desired product **7** as a colorless oil (PE/EtOAc = 3/1, 1.07 g, 80%, 97% ee). <sup>1</sup>H NMR (600 MHz, CDCl<sub>3</sub>) δ (ppm) 7.44 (d, *J* = 7.2 Hz, 2H), 7.37-7.24 (m, 8H), 5.11-5.06 (m, 3H), 4.16-4.04 (m, 2H), 4.03-3.95 (m, 2H), 3.74 (br, 2H), 3.50-3.37 (m, 2H), 2.87 (br, 1H), 2.40 (ABX, *J*<sub>AB</sub> = 14.4 Hz, *J*<sub>AX</sub> = 7.8 Hz, *J*<sub>BX</sub> = 4.2 Hz, 1H), 2.03 (ABX, *J*<sub>AB</sub> = 14.4 Hz, *J*<sub>AX</sub> = 7.8 Hz, *J*<sub>BX</sub> = 4.2 Hz, 1H), 1.25 (t, *J* = 7.2 Hz, 3H); <sup>13</sup>C NMR (150 MHz, CDCl<sub>3</sub>) δ (ppm) 173.9,

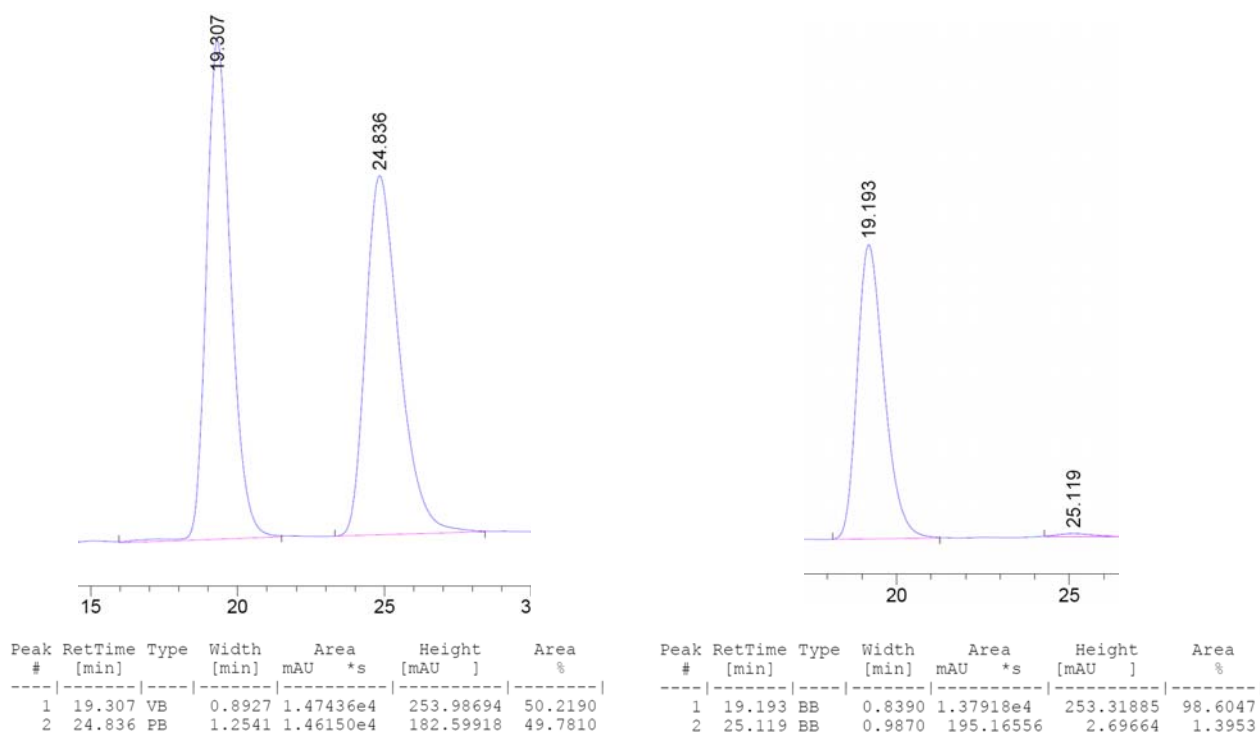

155.8, 141.8, 136.1, 127.8, 127.7, 127.5, 127.4, 127.3, 127.2, 124.9, 108.6, 65.7, 63.9, 63.8, 59.8, 59.7, 42.5, 40.6, 39.3, 13.5; MS (EI)  $m/z$  413 ( $M^+$ );  $[\alpha]_D^{20} = -5.1$  ( $c = 5.0$ ,  $CH_2Cl_2$ ); *Anal. Calcd.* for  $C_{23}H_{27}NO_6$ : C, 66.81; H, 6.58; N, 3.39; Found: C, 66.89; H, 6.38; N, 3.27; the enantiomeric excess was determined by chiral HPLC (Chiralpak OD column: hexane/2-propanol = 90/10, 1 mL/min, 210 nm,  $t_{major} = 19.19$  min,  $t_{minor} = 25.12$  min.)

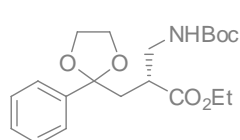

**(R)-Ethyl**

**3-(tert-butoxycarbonylamino)-2-((2-phenyl-1,3-dioxolan-2-yl)methyl)propanoate.**

$^1H$  NMR (600 MHz,  $CDCl_3$ )  $\delta$  (ppm) 7.45 (d,  $J = 7.2$  Hz, 2H), 7.34-7.28 (m, 3H), 4.82 (br, 1H), 4.17-4.09 (m, 2H), 4.05-3.96 (m, 2H), 3.74 (br, 2H), 3.39-3.29 (m, 2H), 2.83 (br, 1H), 2.40 (ABX,  $J_{AB} = 15.0$  Hz,  $J_{AX} = 9.0$  Hz,  $J_{BX} = 4.2$  Hz, 1H), 2.01 (ABX,  $J_{AB} = 15.0$  Hz,  $J_{AX} = 9.0$  Hz,  $J_{BX} = 4.2$  Hz, 1H), 1.42 (s, 9H), 1.27 (t,  $J = 7.2$  Hz, 3H);  $^{13}C$  NMR (150 MHz,  $CDCl_3$ )  $\delta$  (ppm) 174.2, 155.3, 141.9, 127.7, 127.6, 125.1, 108.9, 78.5, 64.1, 64.0, 59.9, 42.3, 40.9, 39.5, 27.9, 13.8; MS (EI)  $m/z$  379 ( $M^+$ ); *Anal. Calcd.* for  $C_{20}H_{29}NO_6$ : C, 63.31; H, 7.70; N, 3.69; Found: C, 63.26; H, 7.75; N, 3.60;

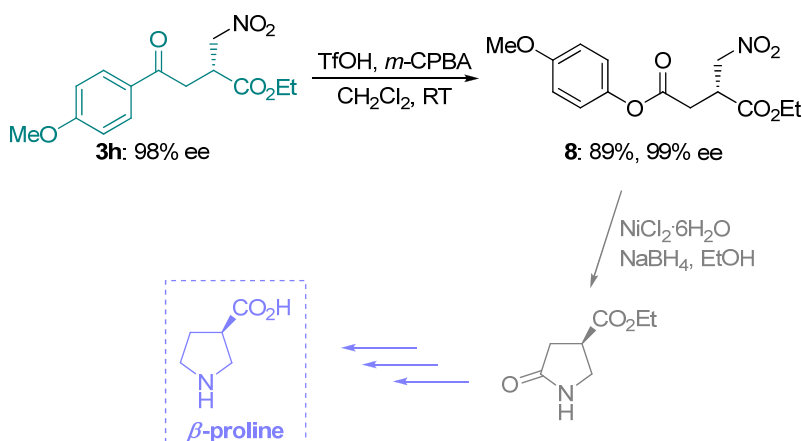

**(R)-1-Ethyl 4-(4-methoxyphenyl) 2-(nitromethyl)succinate (8).**<sup>4</sup> To a three-necked flask containing **3h** (1 mmol, 295 mg) were sequentially added dichloromethane (5 mL), TfOH (20 mol%, 30 mg) and *m*-Chloro perbenzoic acid (430 mg, 2.0 equiv., ~80% purity) under nitrogen at RT. The mixture was stirred at RT for 21 h. Then the white solid was removed by suction filtration and washed with dichloromethane. The organics were removed *in vacuo* and the residue was purified by column chromatography to provide the desired product as a colorless oil (89%, 99% ee).  $^1H$  NMR (600 MHz,  $CDCl_3$ )  $\delta$  (ppm) 7.00 (d,  $J = 9.0$  Hz, 2H), 6.89 (d,  $J = 9.0$  Hz, 2H), 4.88 (ABX,  $J_{AB} = 14.4$  Hz,  $J_{AX} = 6.0$  Hz,  $J_{BX} = 5.4$  Hz, 1H), 4.80 (ABX,  $J_{AB} = 14.4$  Hz,  $J_{AX} = 6.0$  Hz,  $J_{BX} = 5.4$  Hz, 1H), 4.27-4.23 (m, 2H), 3.80 (s, 3H), 3.65-3.59 (m, 1H), 3.10 (ABX,  $J_{AB} = 17.4$  Hz,  $J_{AX} = 6.0$  Hz,  $J_{BX} = 6.6$  Hz, 1H), 2.97-3.10 (ABX,  $J_{AB} = 17.4$  Hz,  $J_{AX} = 6.0$  Hz,  $J_{BX} = 6.6$  Hz, 1H), 1.29 (t,  $J = 7.2$  Hz, 3H);  $^{13}C$  NMR (150 MHz,  $CDCl_3$ )  $\delta$  (ppm) 169.9, 169.5, 157.1, 143.5, 121.8, 114.1, 74.1, 61.7, 55.1, 38.7, 32.6, 13.6; MS (EI)  $m/z$  311 ( $M^+$ ); *Anal. Calcd.* for  $C_{14}H_{17}NO_7$ : C, 54.02; H, 5.50; N, 4.50; Found: C, 54.12; H, 5.39; N, 4.35; the enantiomeric excess was determined by chiral HPLC (Chiralpak AD column: hexane/2-propanol = 90/10, 1 mL/min, 210 nm,  $t_{major} = 26.77$  min,  $t_{minor} = 29.89$  min.)

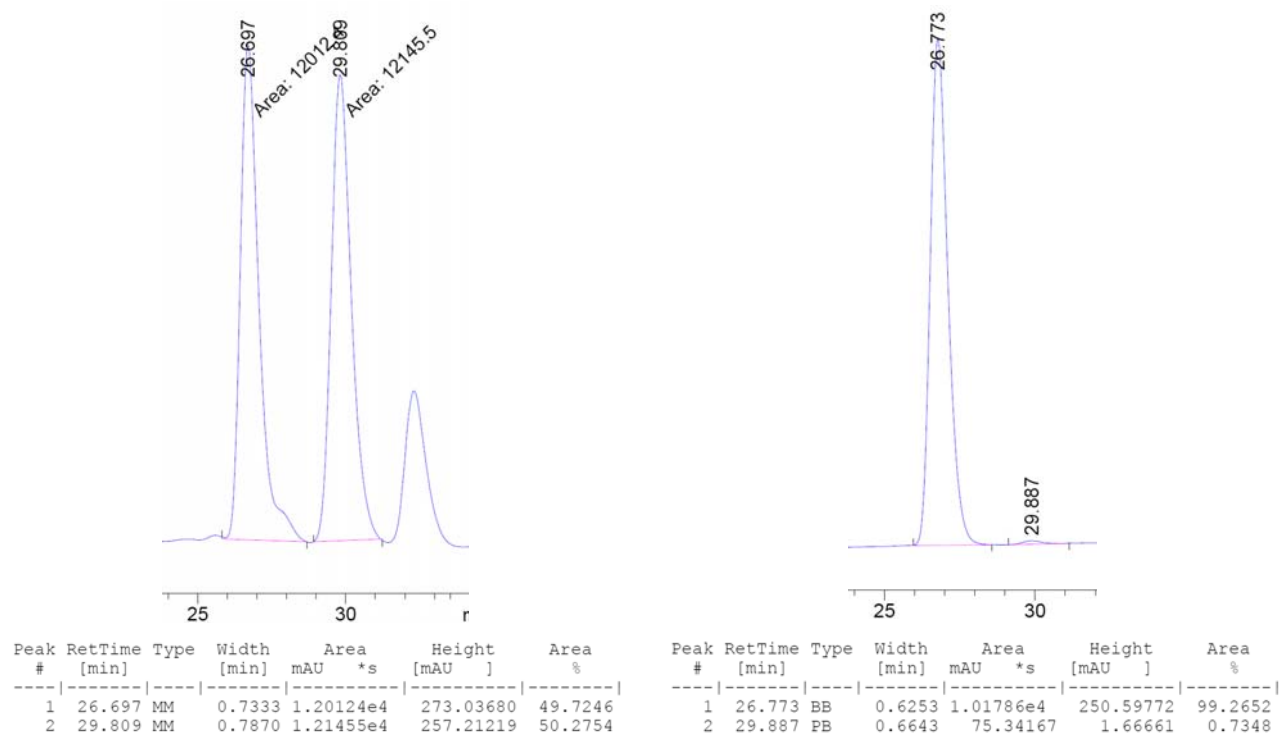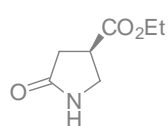

**(R)-ethyl 5-oxopyrrolidine-3-carboxylate.**  $^1\text{H}$  NMR (600 MHz,  $\text{CDCl}_3$ )  $\delta$  (ppm) 6.90 (br, 1H), 4.20 (q,  $J = 7.2$  Hz, 2H), 3.64-3.62 (m, 2H), 3.35-3.32 (m, 1H), 2.67 (ABX,  $J_{AB} = 17.4$  Hz,  $J_{AX} = 7.8$  Hz,  $J_{BX} = 9.6$  Hz, 1H), 2.58 (ABX,  $J_{AB} = 17.4$  Hz,  $J_{AX} = 7.8$  Hz,  $J_{BX} = 9.6$  Hz, 1H);  $^{13}\text{C}$  NMR (150 MHz,  $\text{CDCl}_3$ )  $\delta$  (ppm) 176.7, 172.6, 61.3, 44.4, 38.8, 33.1, 14.1; MS (EI)  $m/z$  157 ( $\text{M}^+$ ); *Anal. Calcd.* for  $\text{C}_7\text{H}_{11}\text{NO}_3$ : C, 53.49; H, 7.05; N, 8.91; Found: C, 53.57; H, 7.13; N, 8.83;

---

<sup>1</sup> Still, W. C.; Kahn, M.; Mitra, A. J. *J. Org. Chem.* **1978**, *43*, 2923.

<sup>2</sup> Perrin, D. D.; Armarego, W. L. F. *Purification of Laboratory Chemicals*, 4th ed.; Pergamon Press: Oxford, 1997.

<sup>3</sup> a) Okino, T.; Hoashi, Y.; Takemoto, Y. *J. Am. Chem. Soc.* **2003**, *125*, 12672; b) Li, B.; Jiang, L.; Liu, M.; Chen, Y.; Ding, L.; Wu, Y. *Synlett* **2005**, 603; c) McCooey, S. H.; Connon, S. J. *Angew. Chem. Int. Ed.* **2005**, *44*, 6367; d) Ye, J.; Dixon, D. J.; Hynes, P. S. *Chem. Commun.* **2005**, 4481.

<sup>4</sup> Kotsuki, H.; Arimura, K.; Araki, T.; Shinohara, T. *Synlett* **1999**, 462.

## 5. NMR Spectra of 4-oxo-enoates 1b-t, $\gamma$ -keto esters 3, 4, 5, 7 and 8

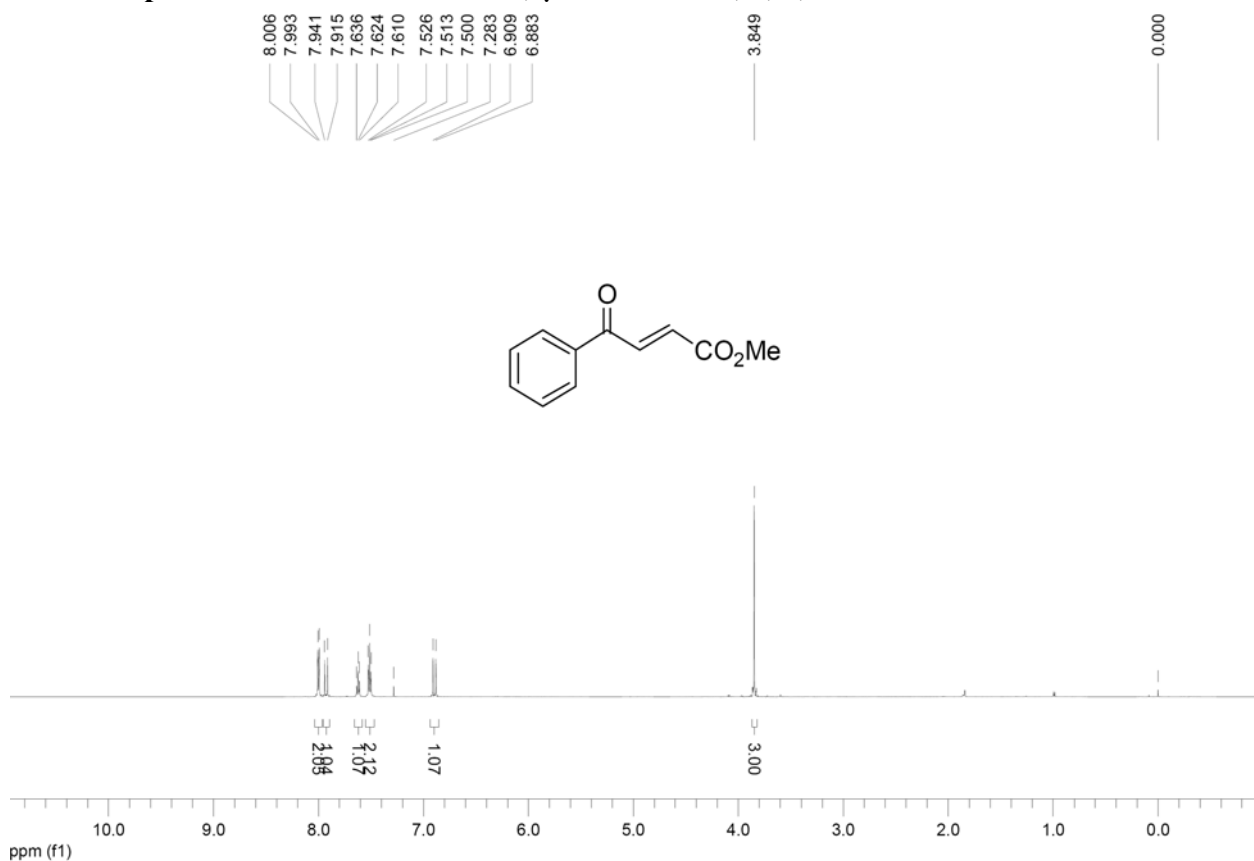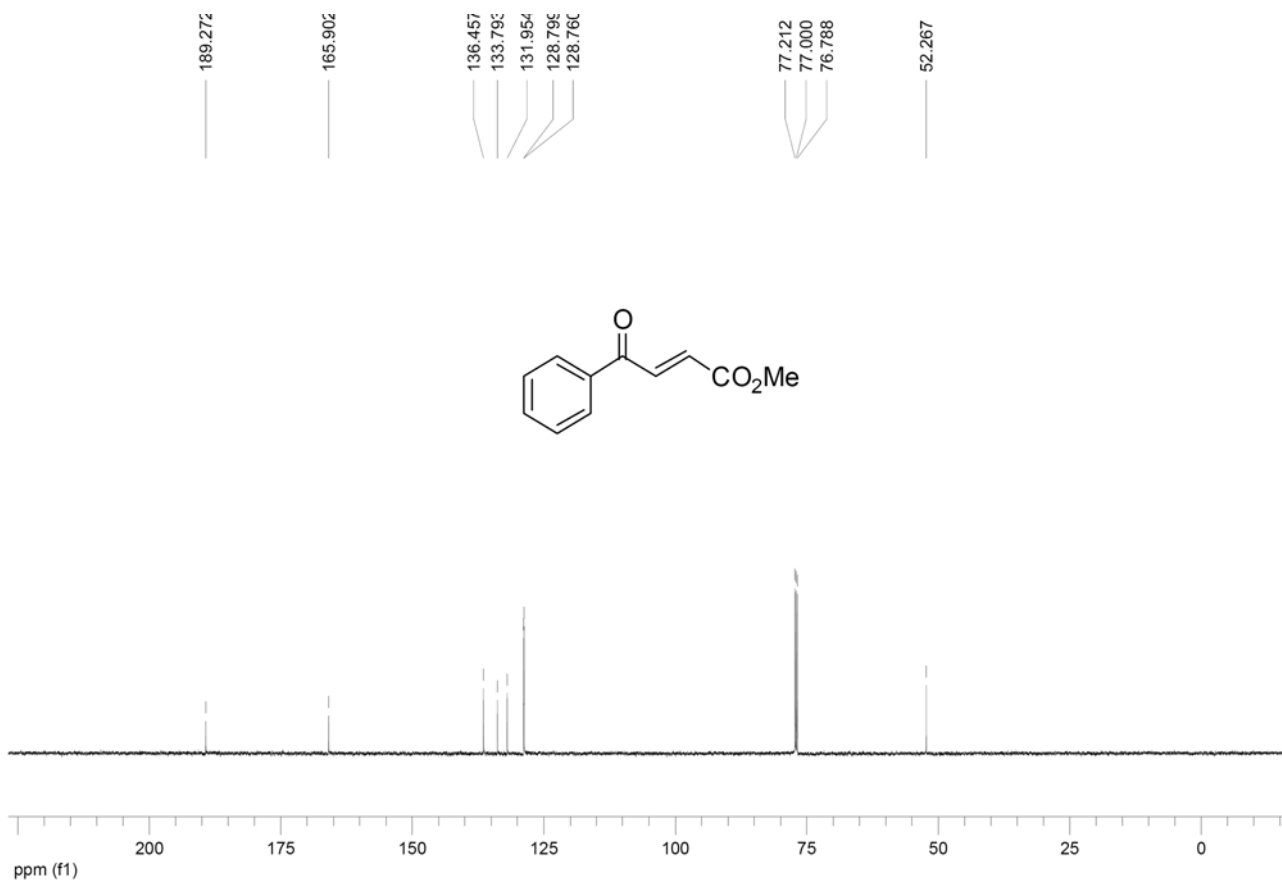

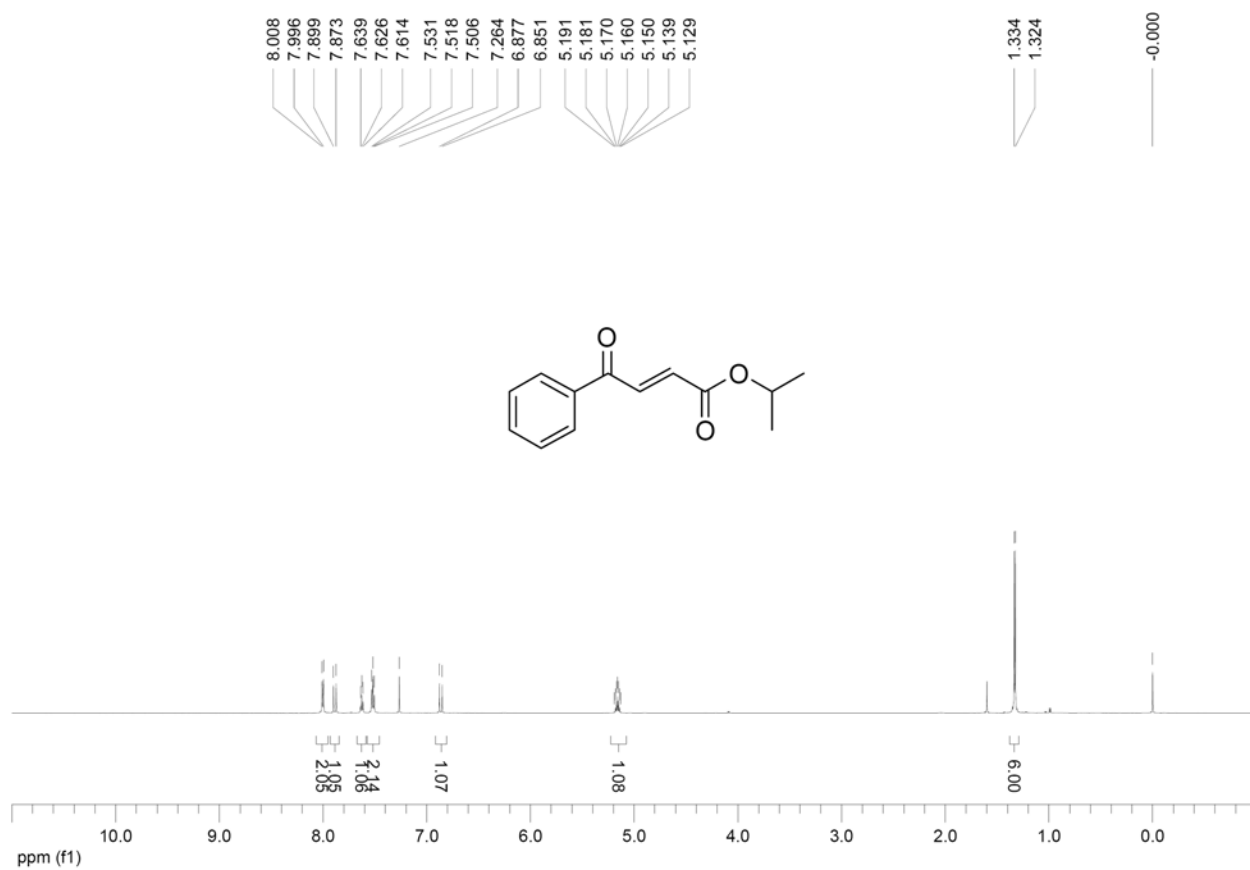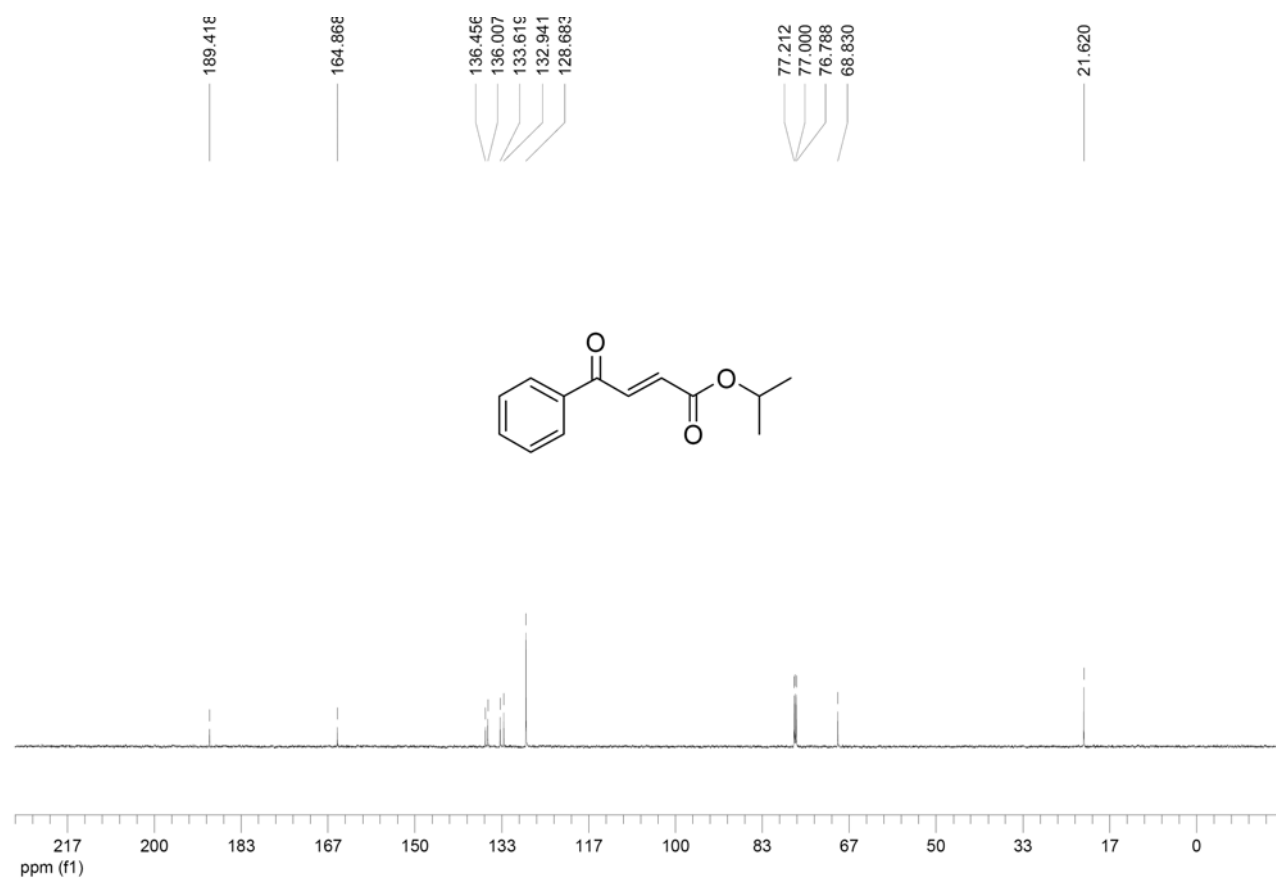

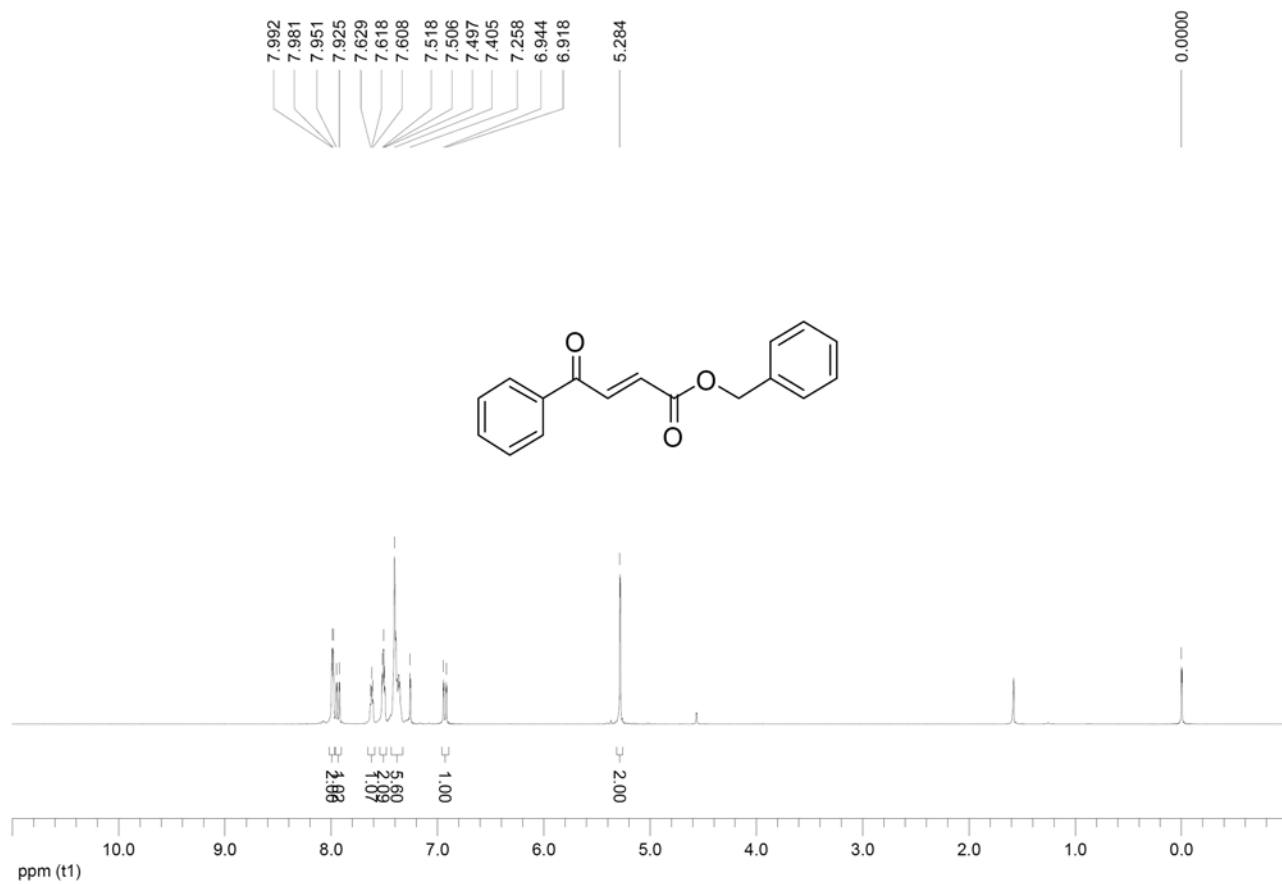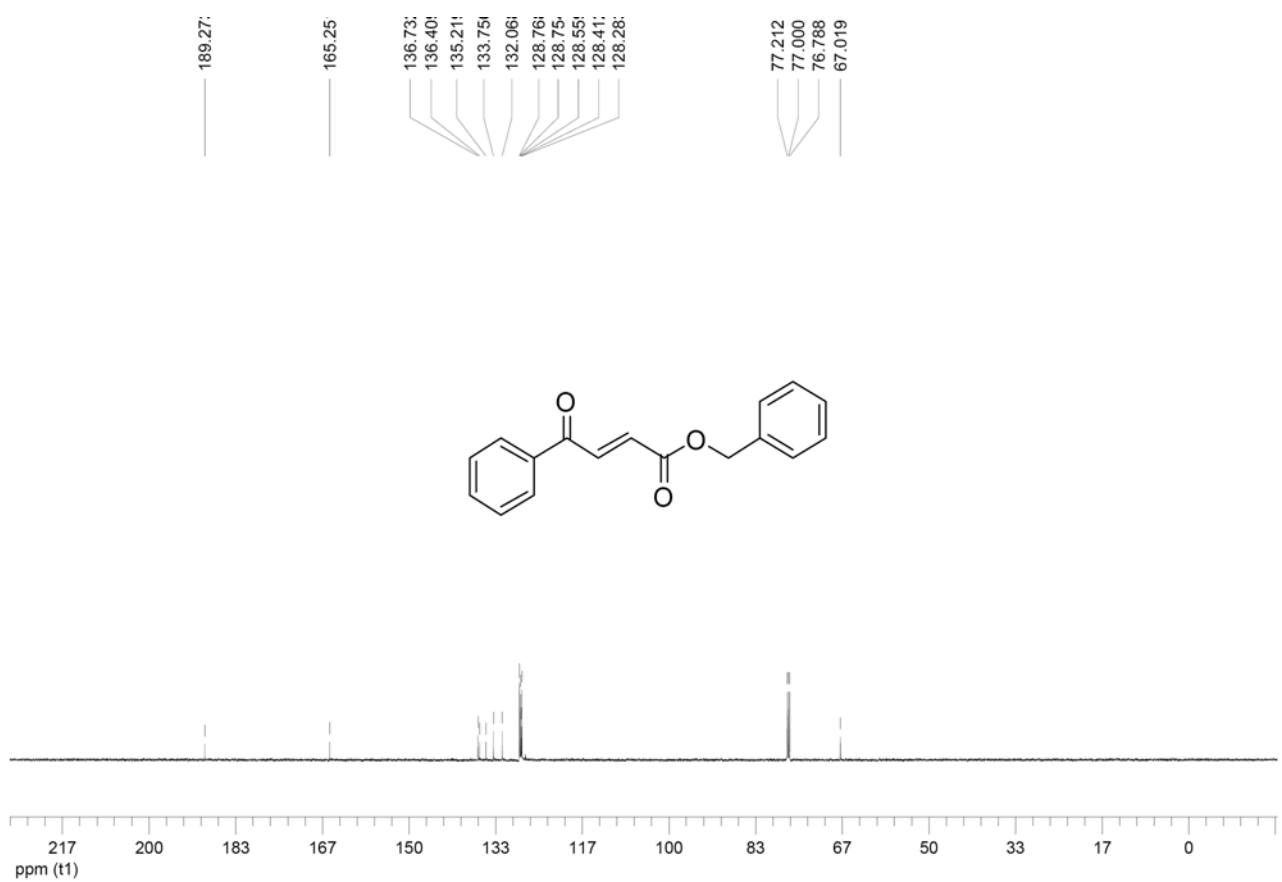

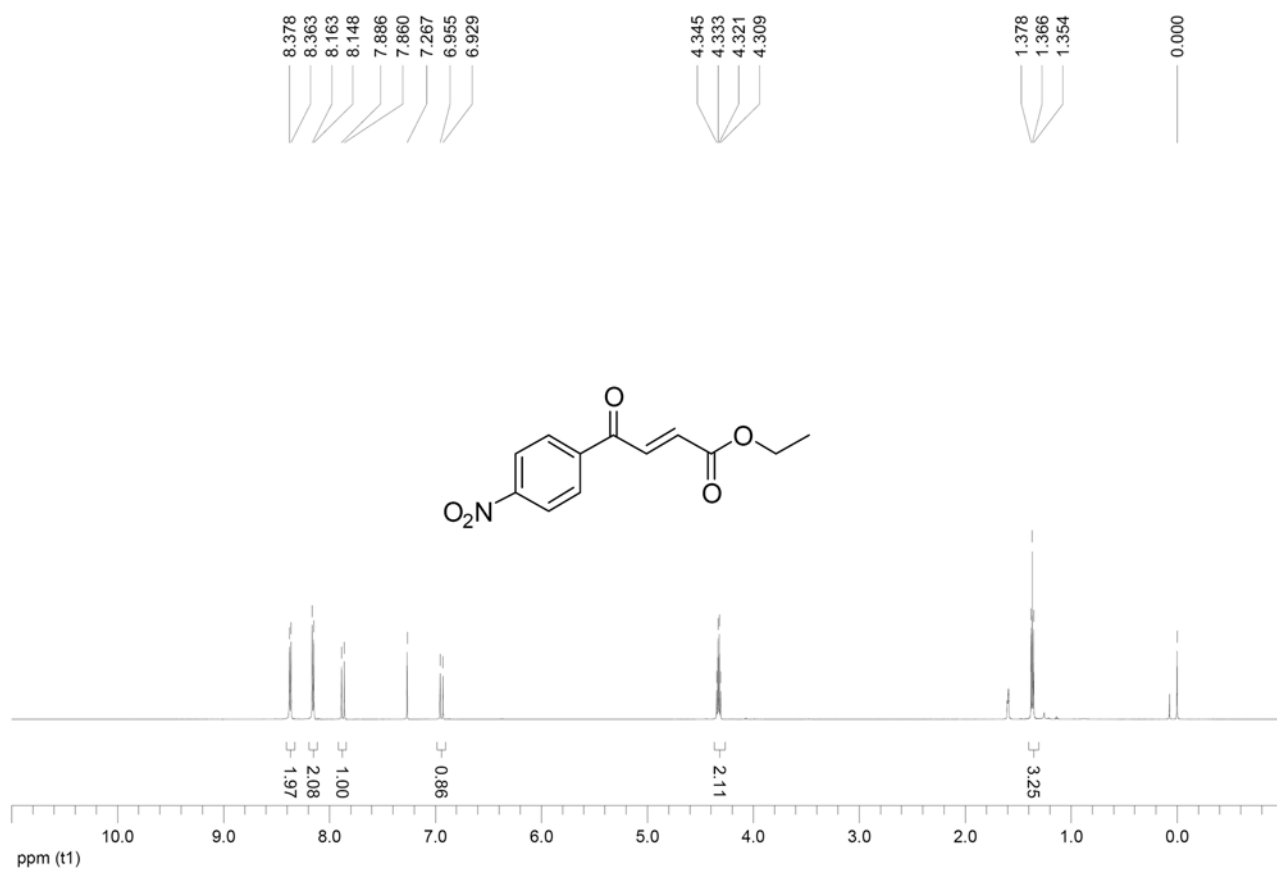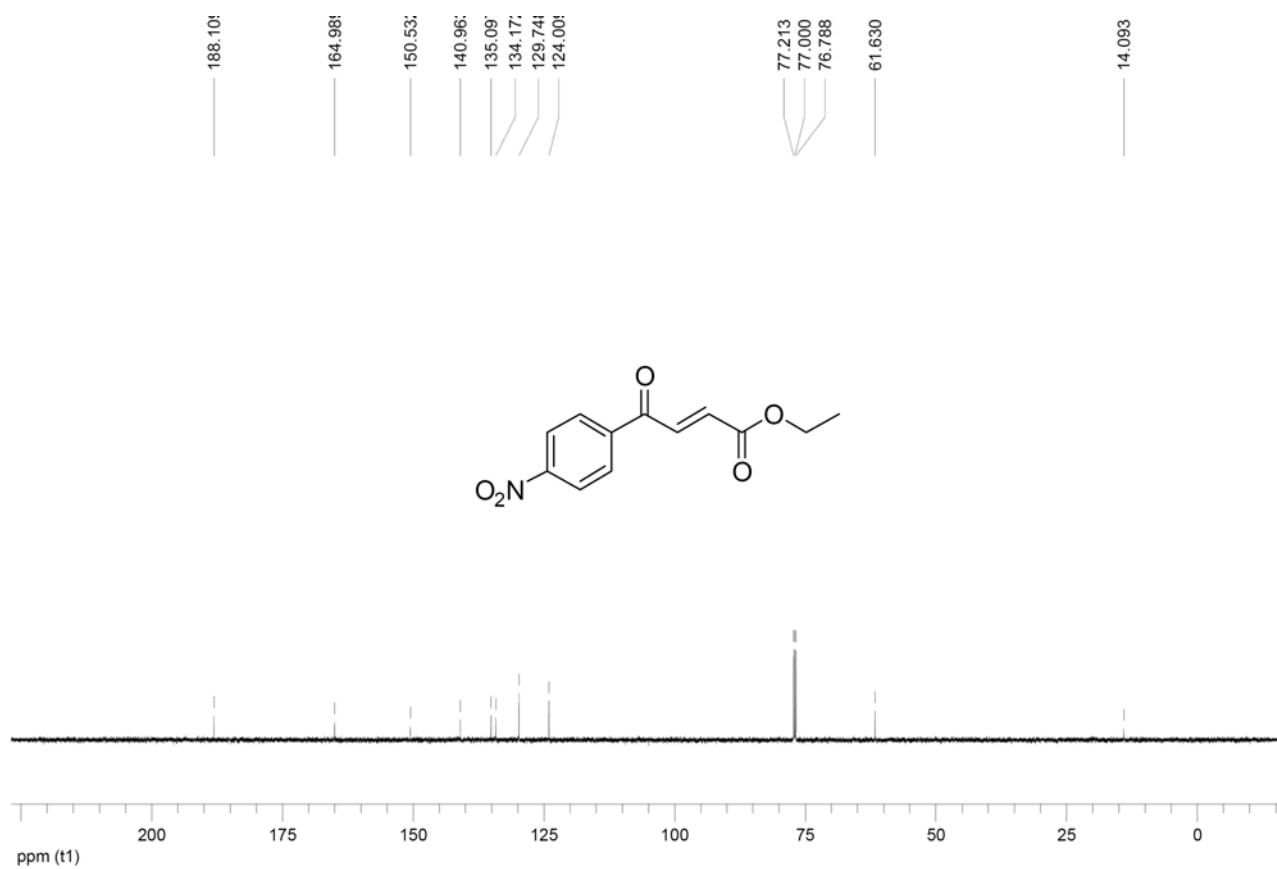

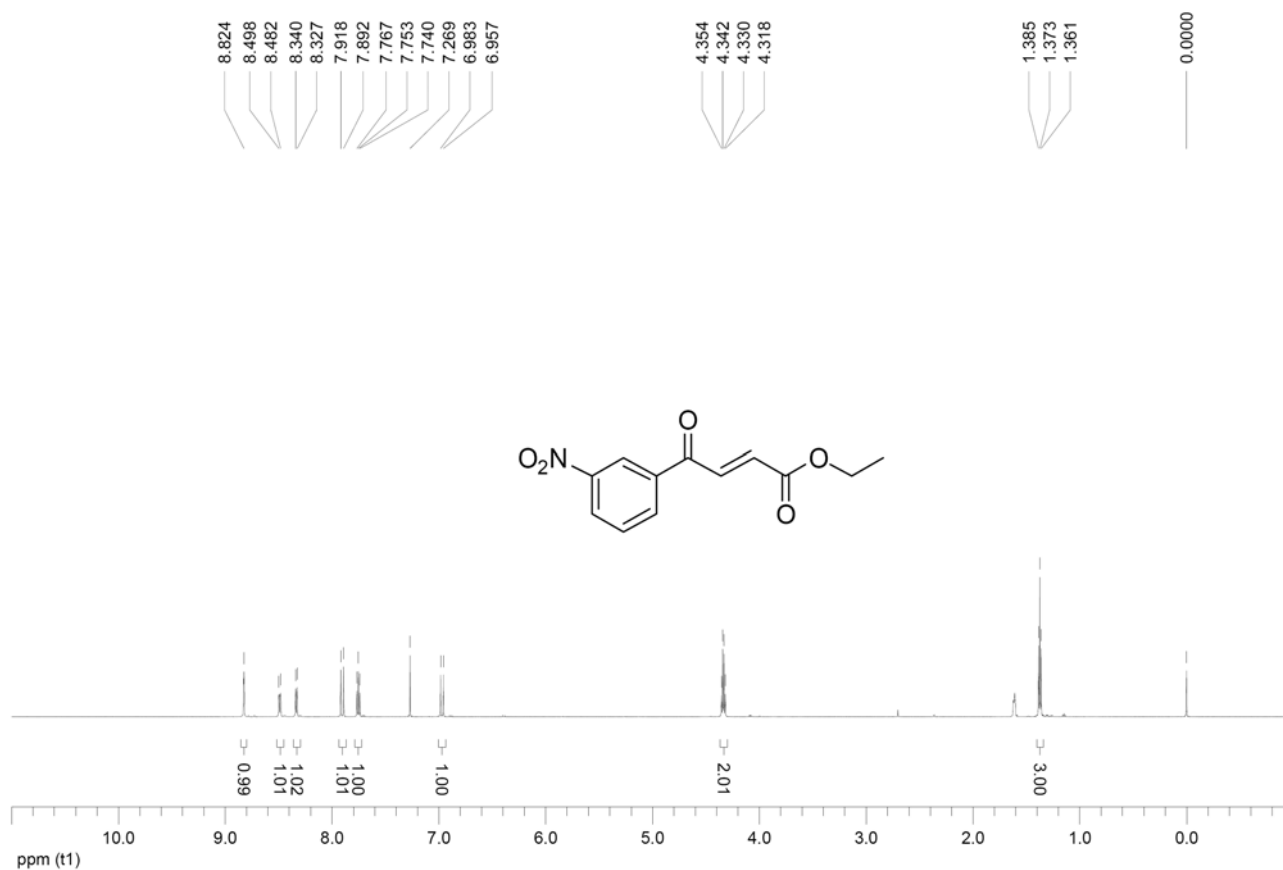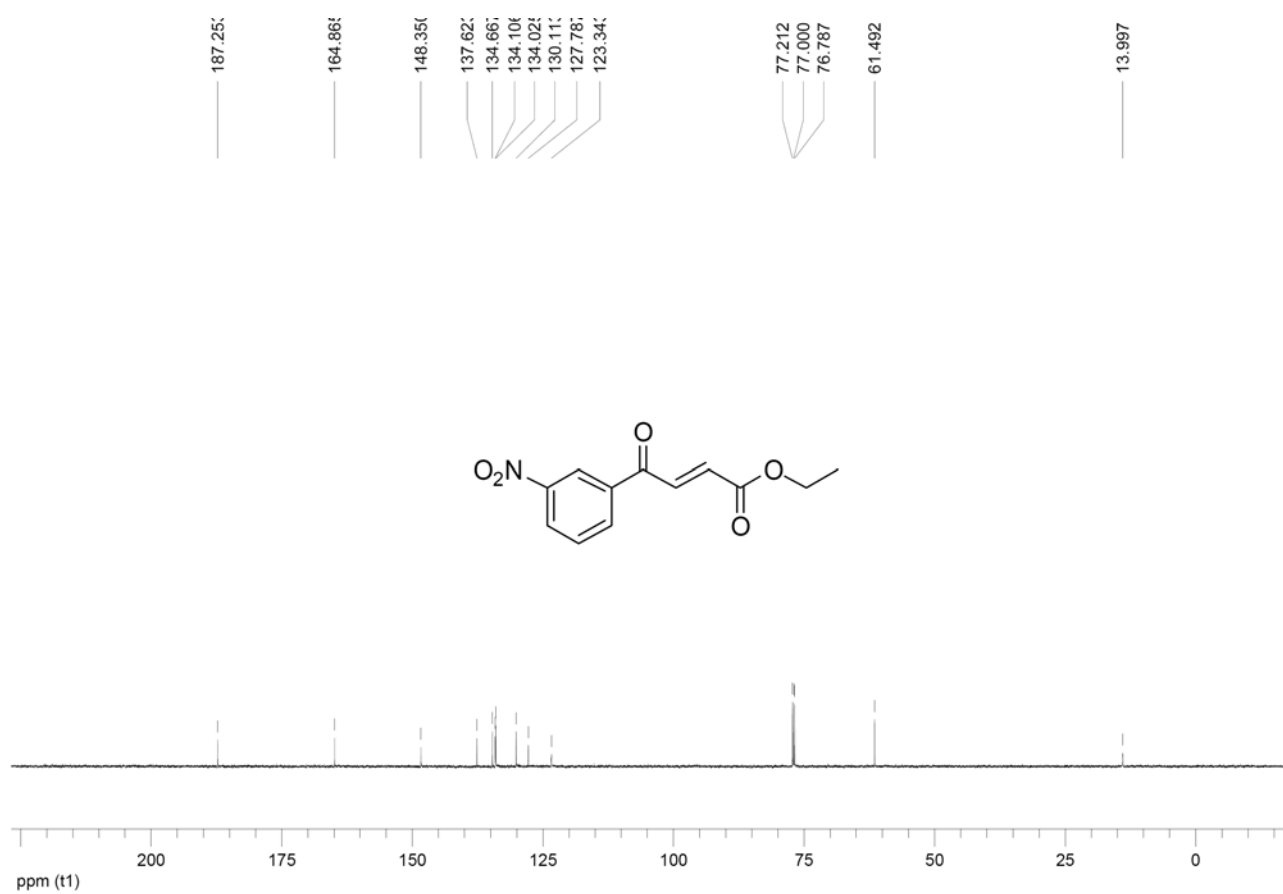

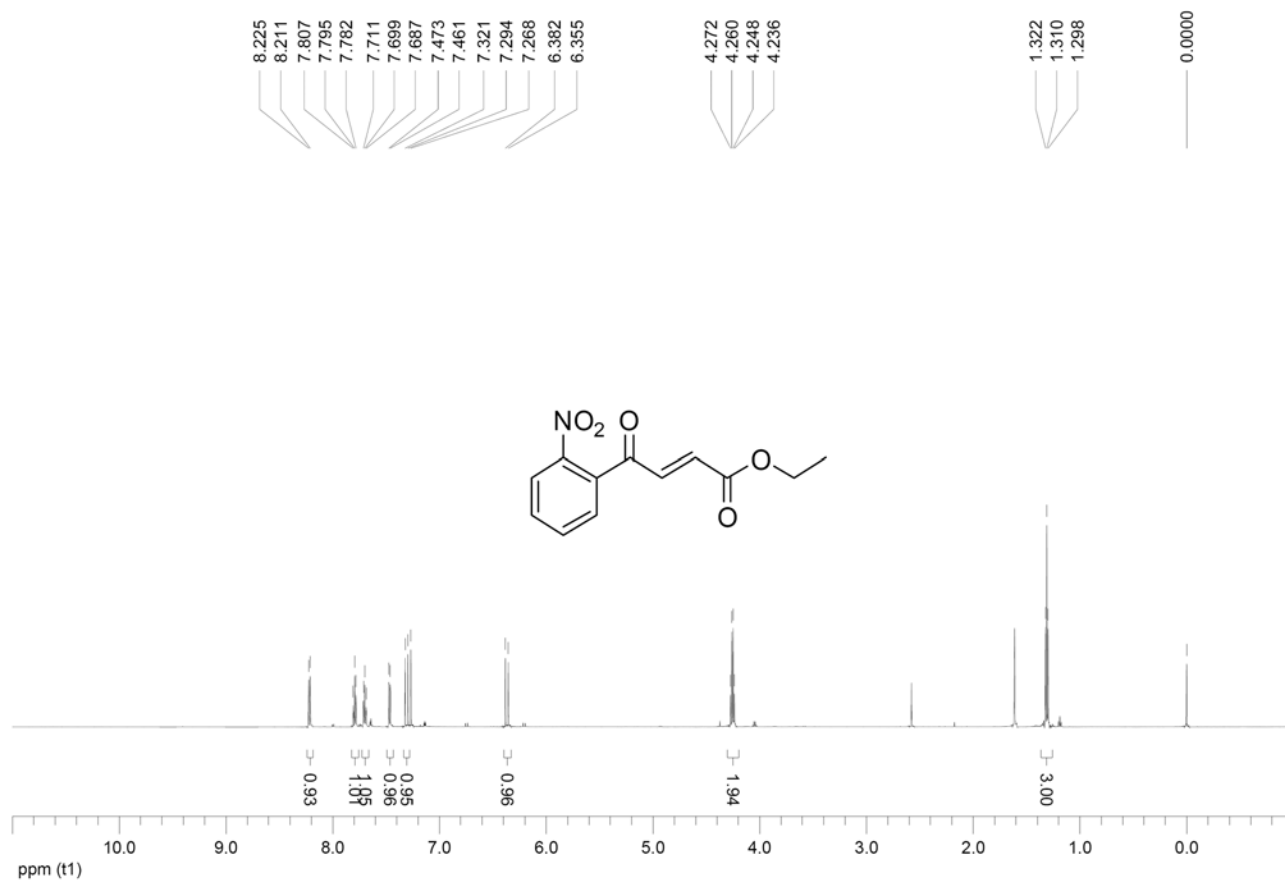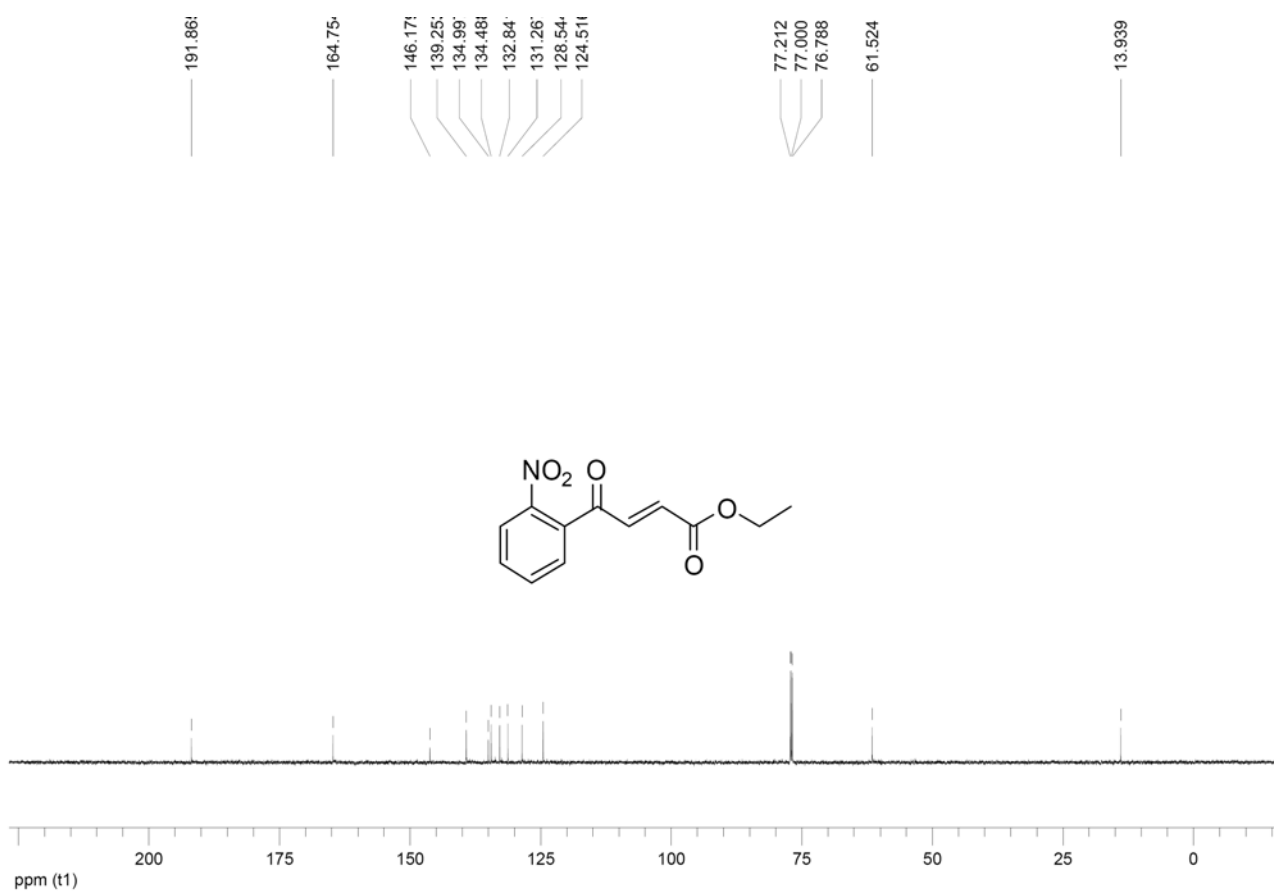

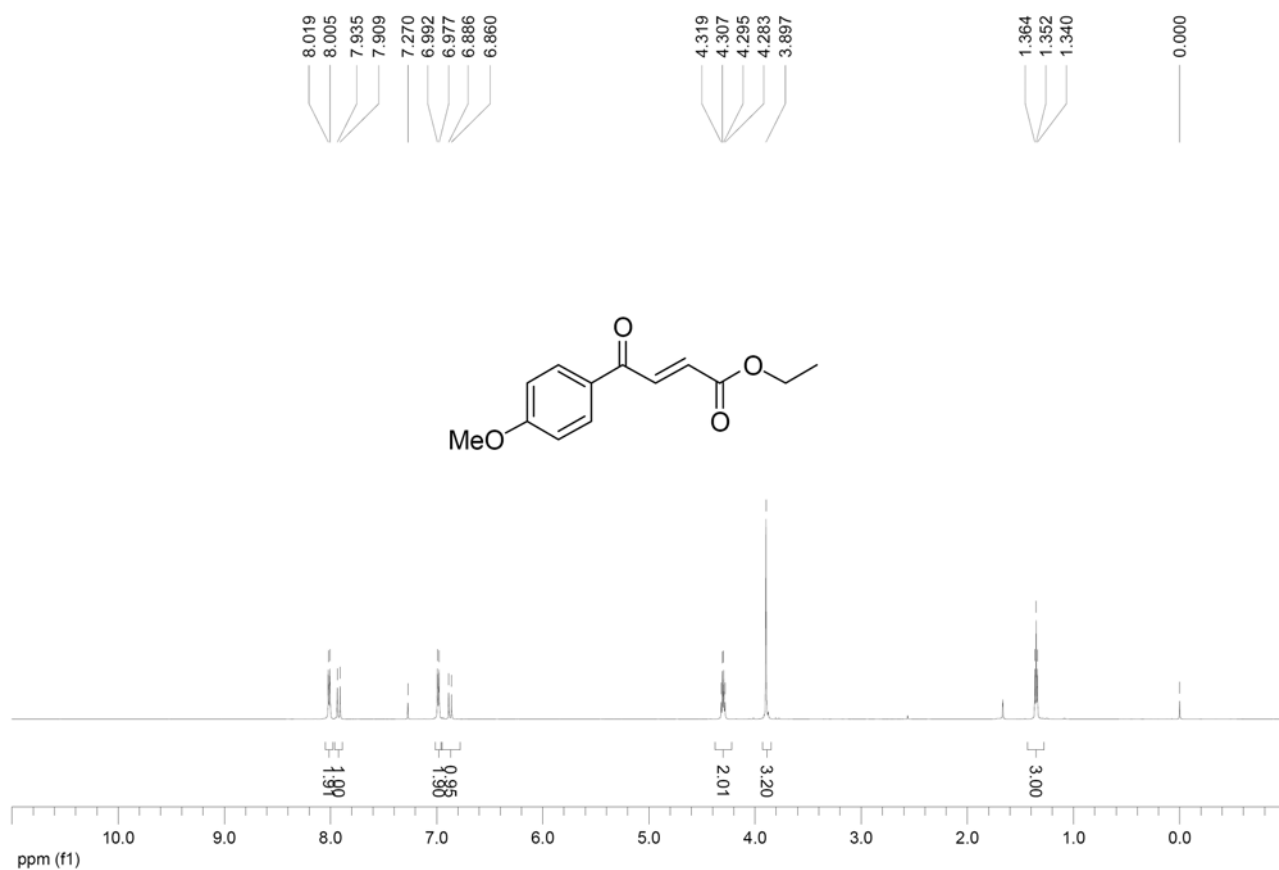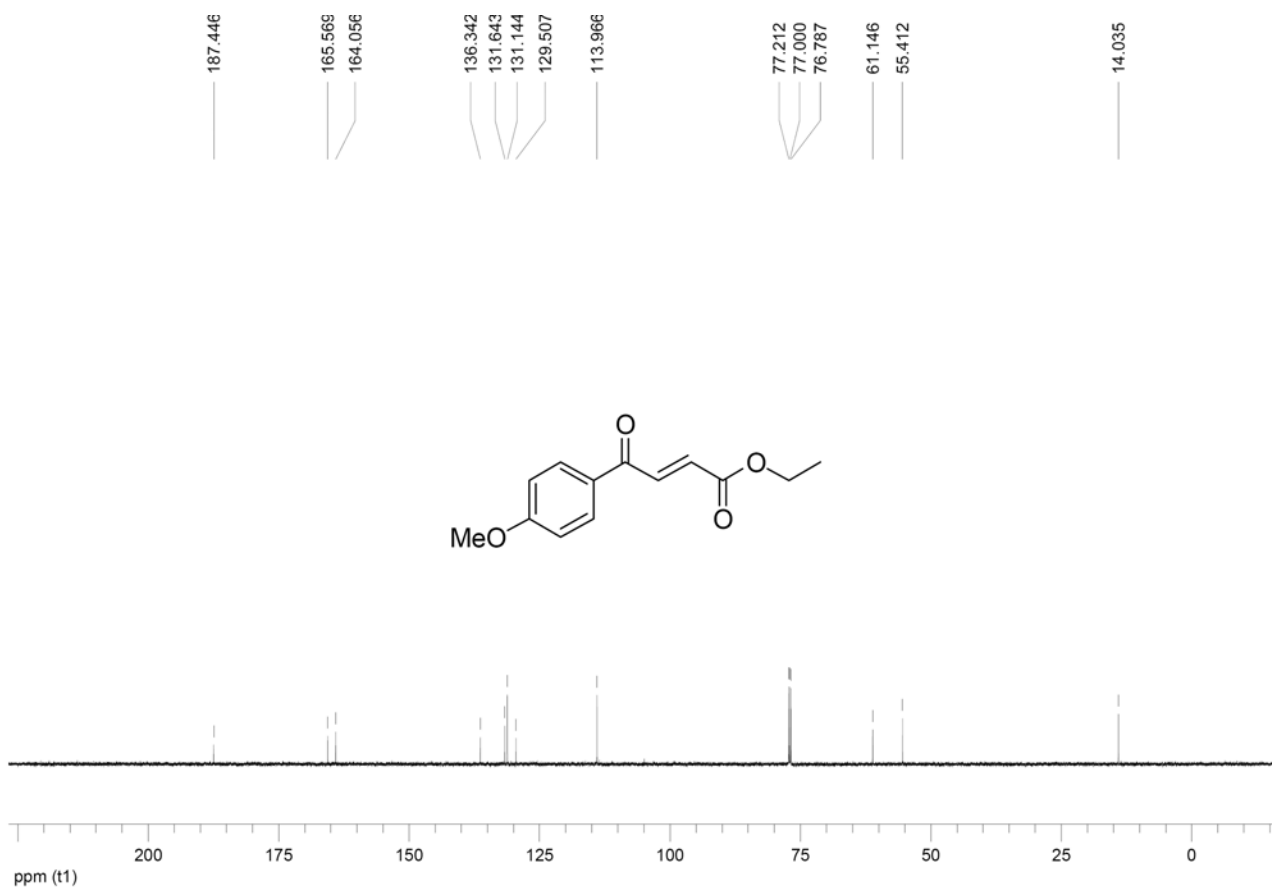

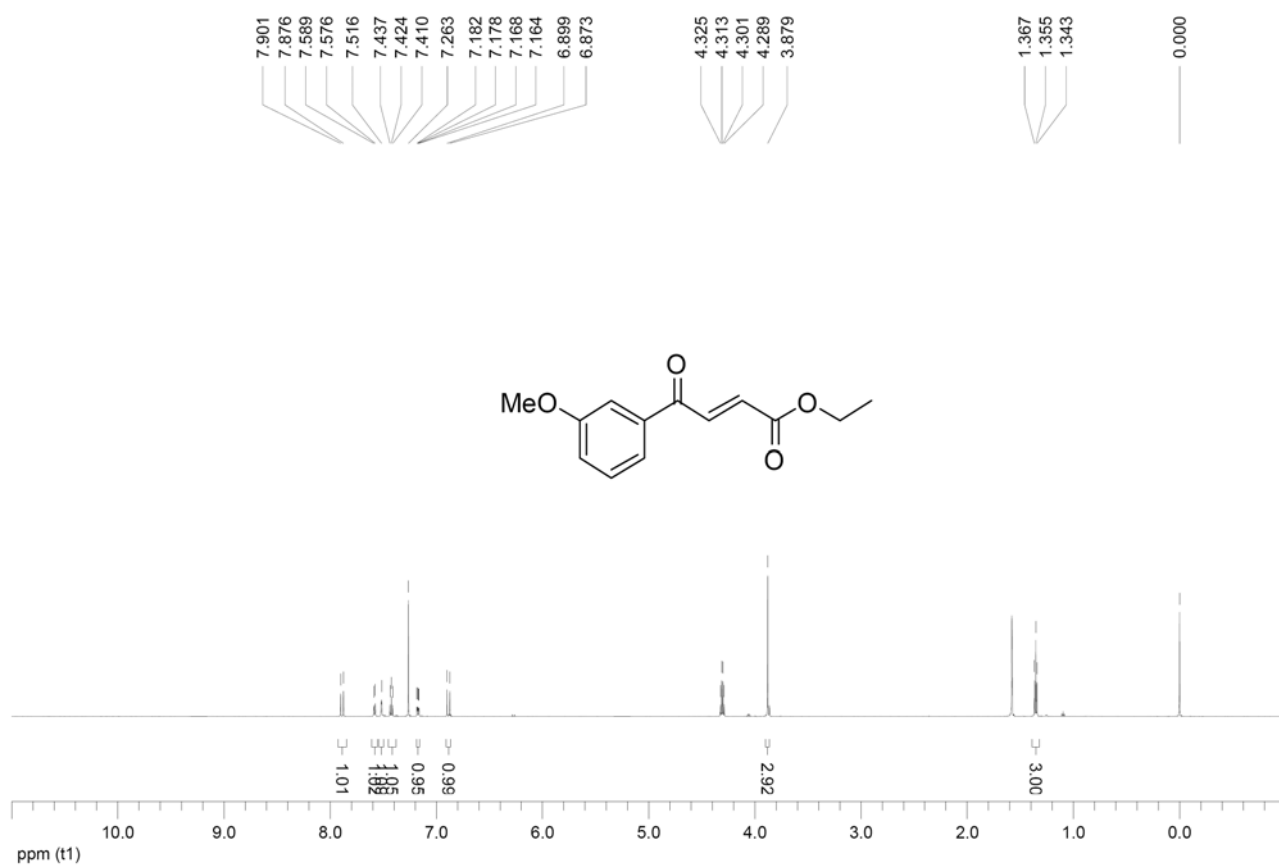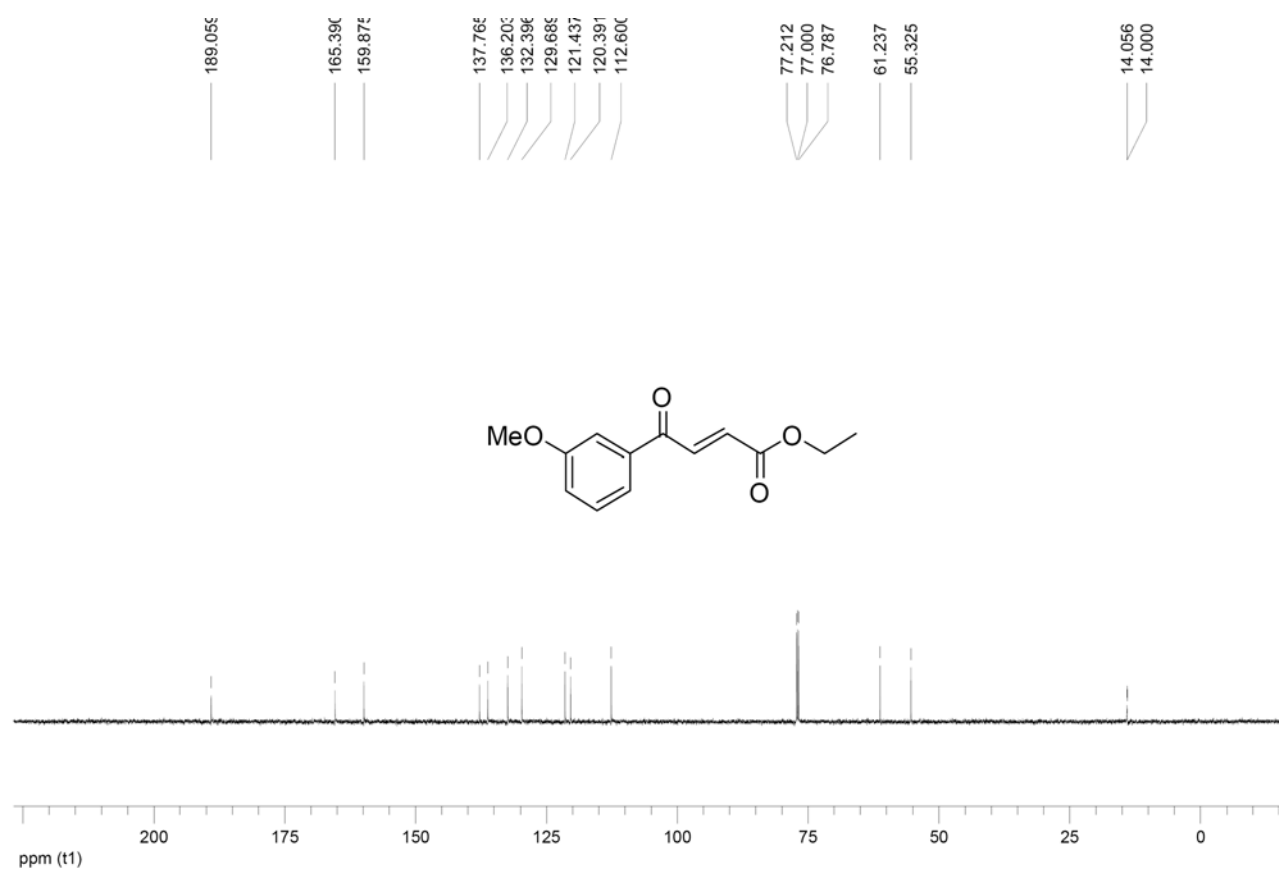

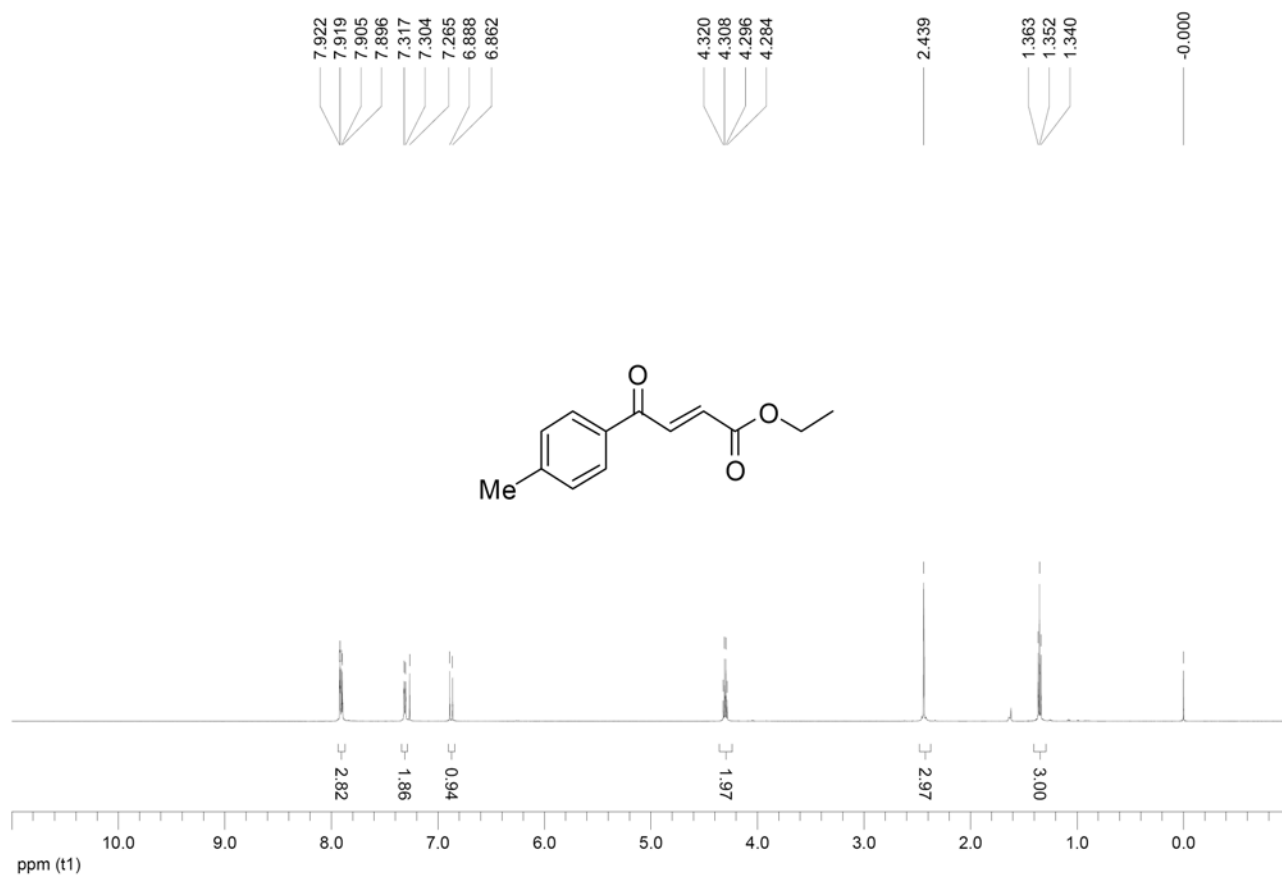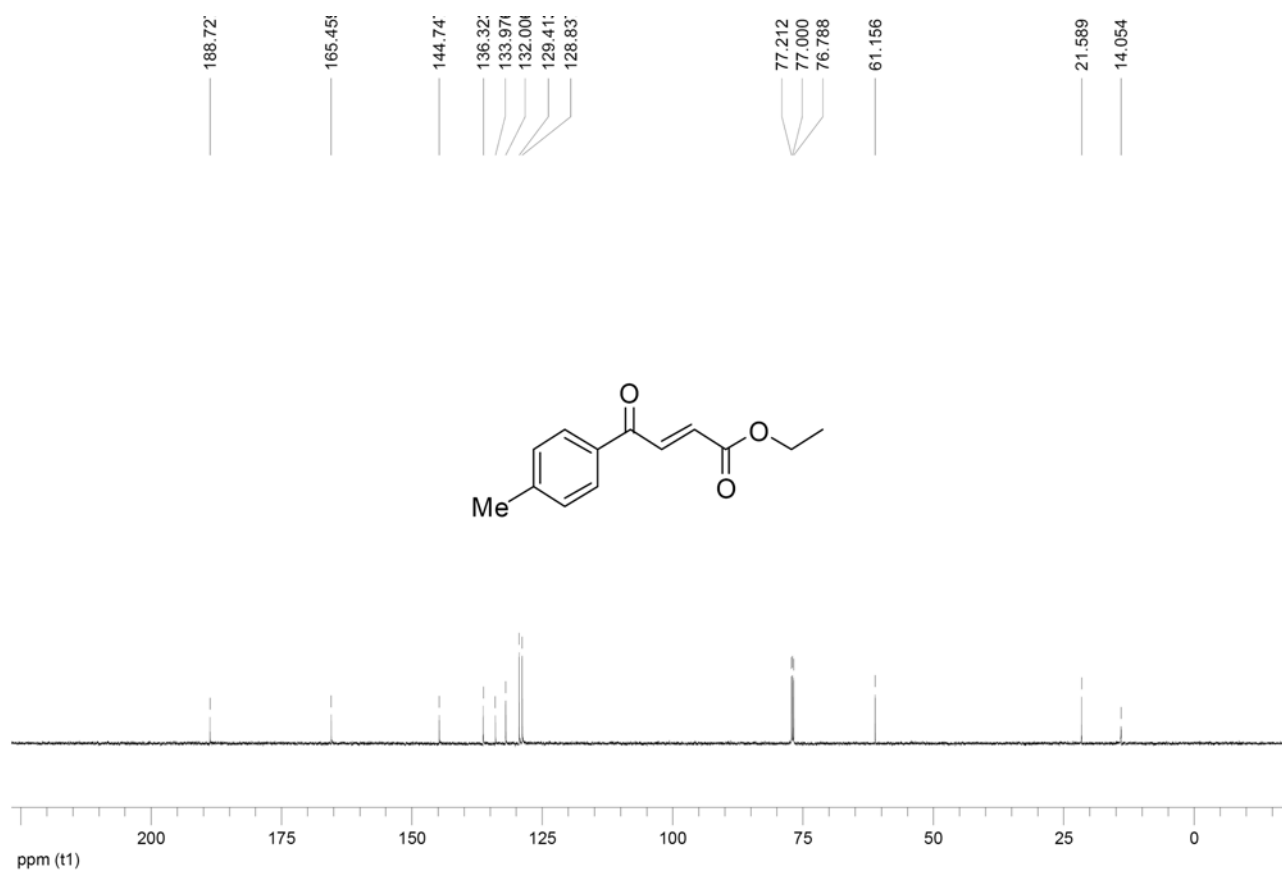

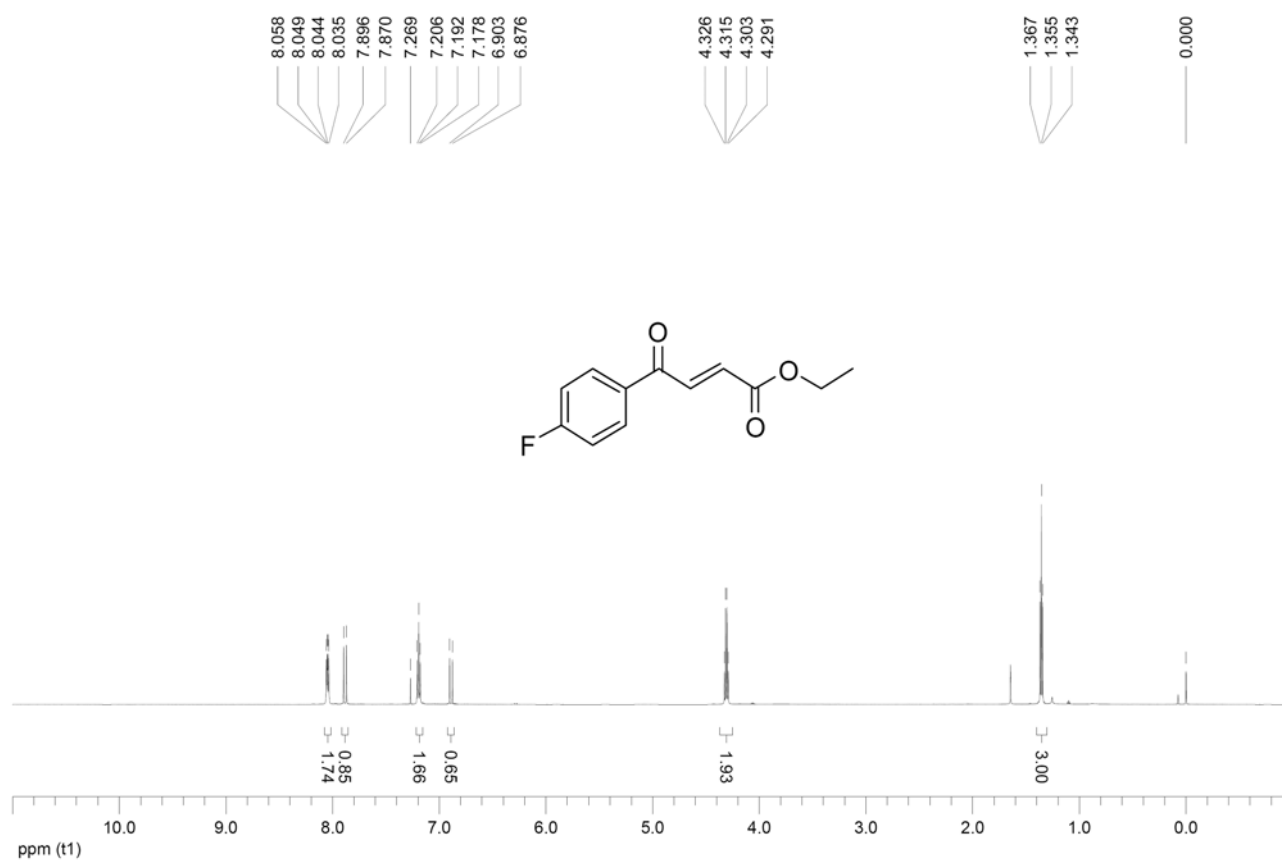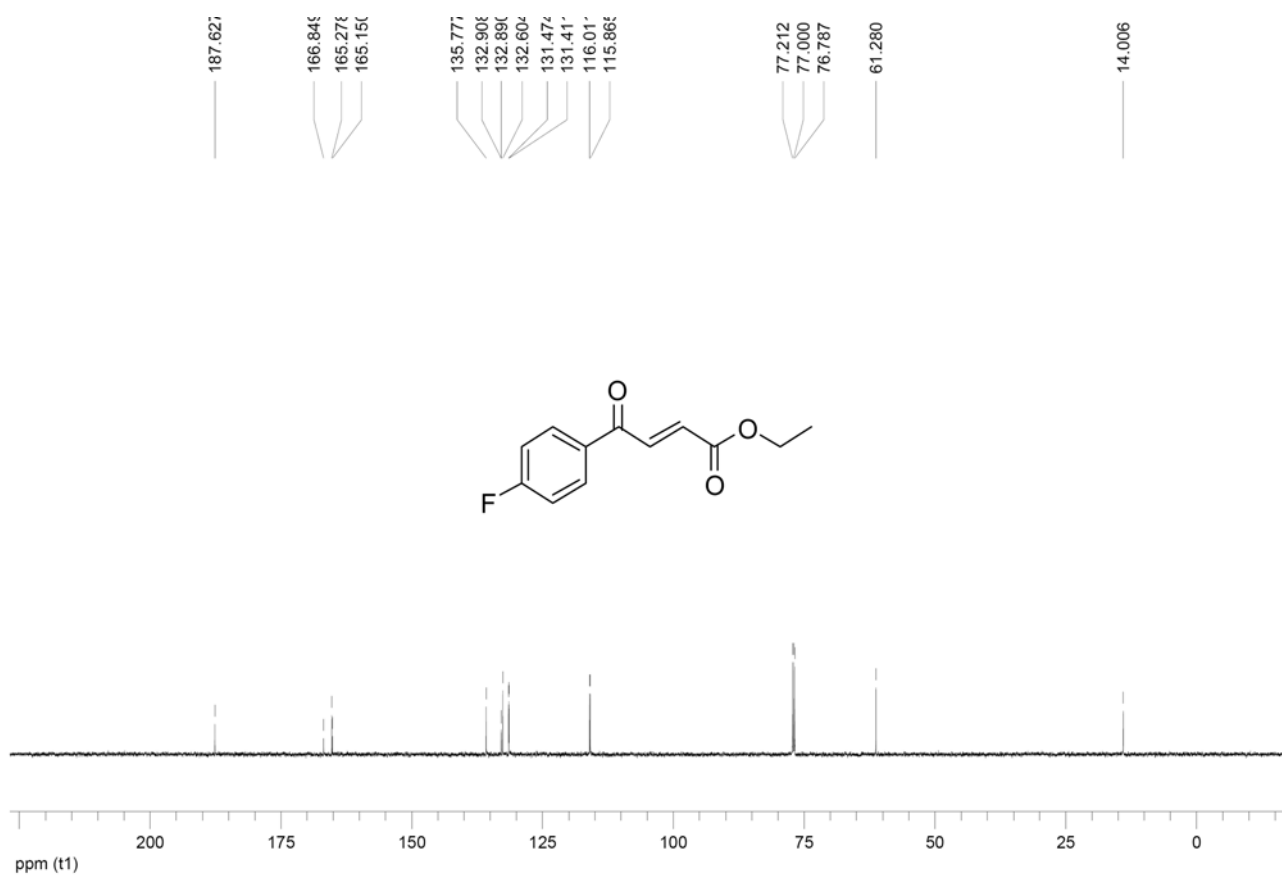

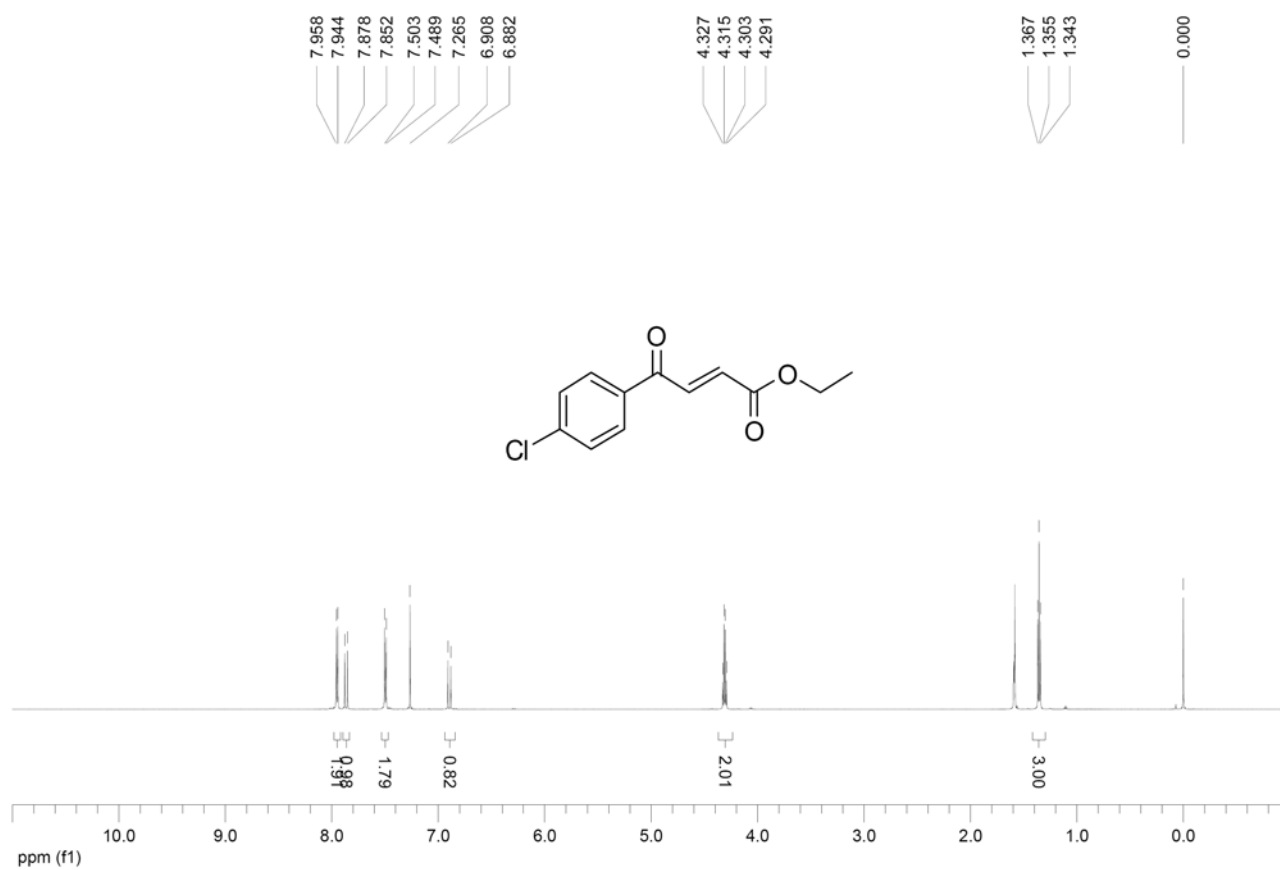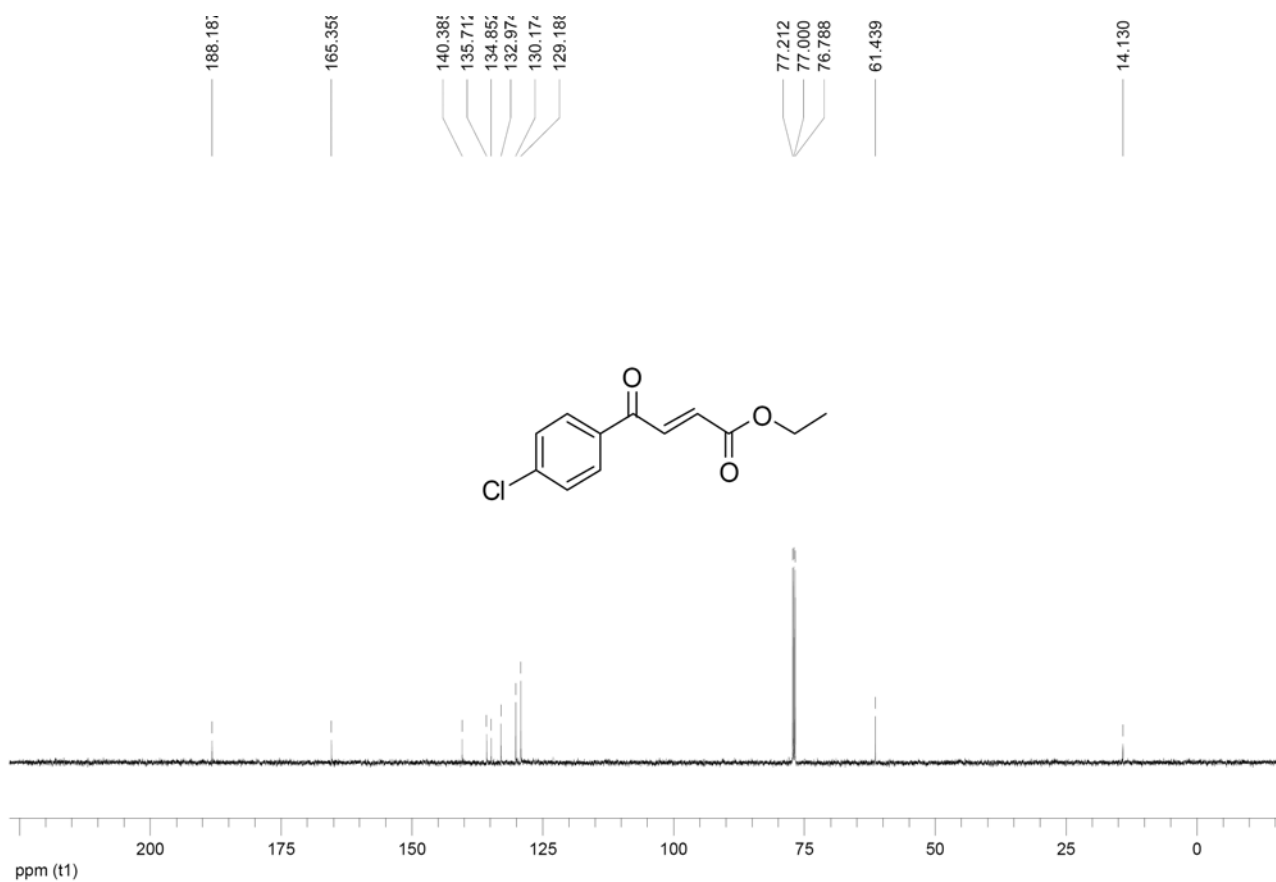

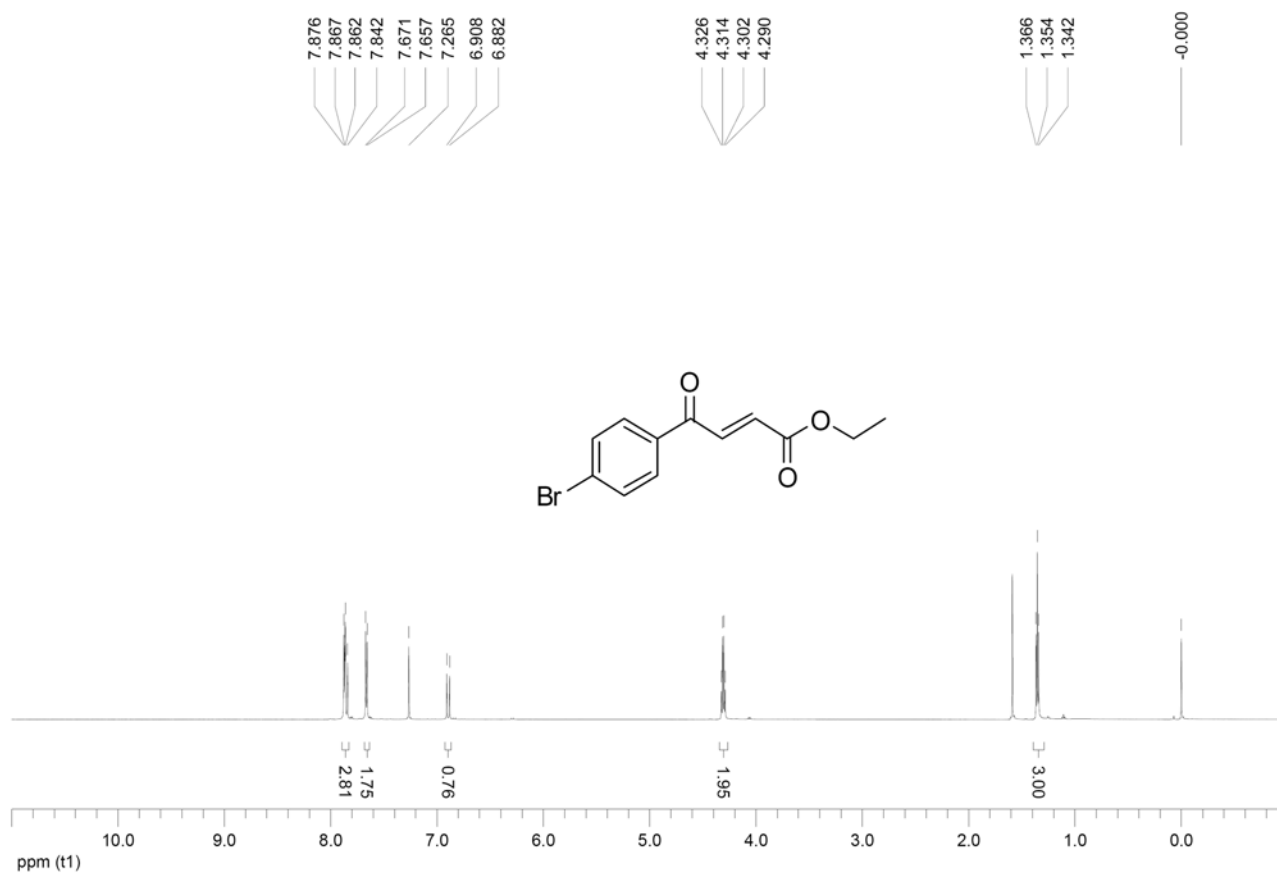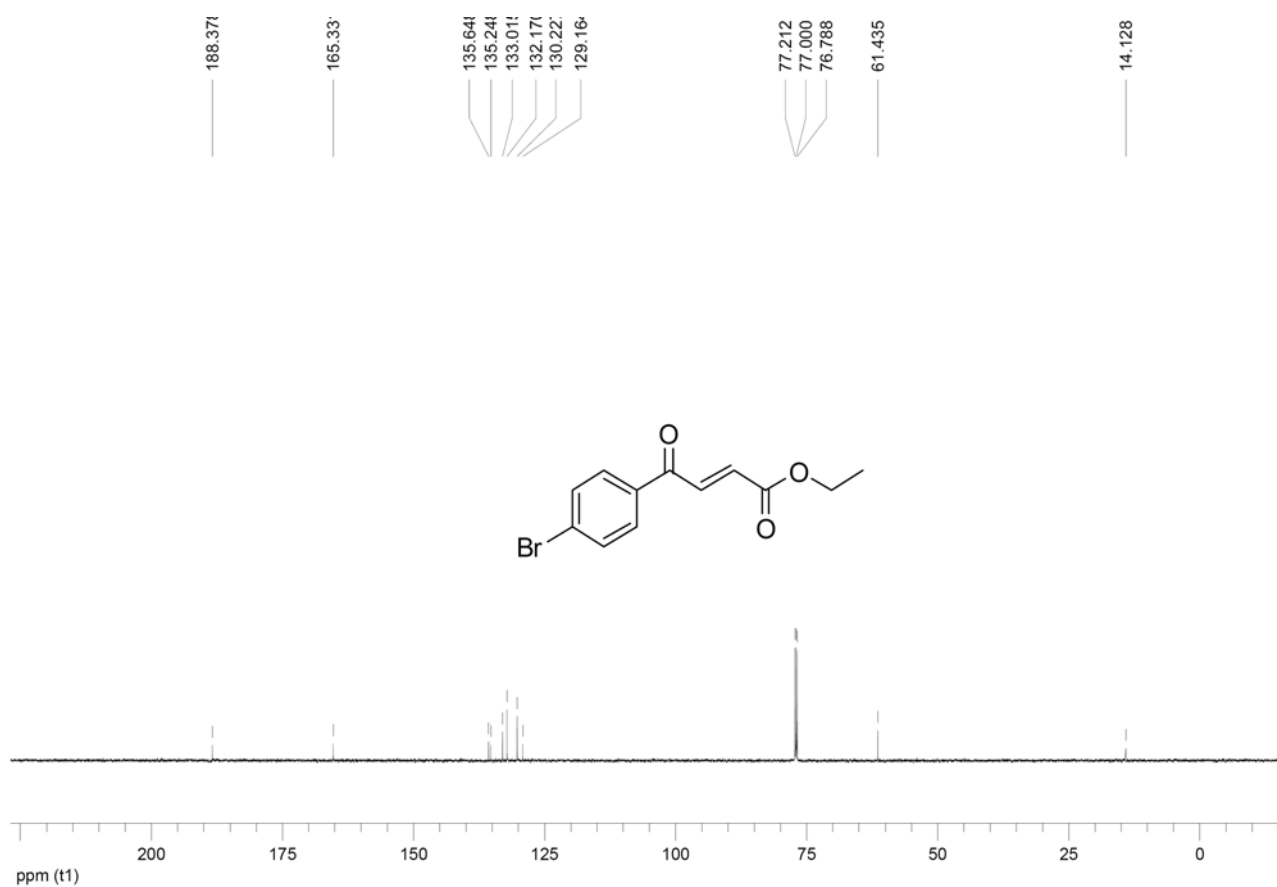

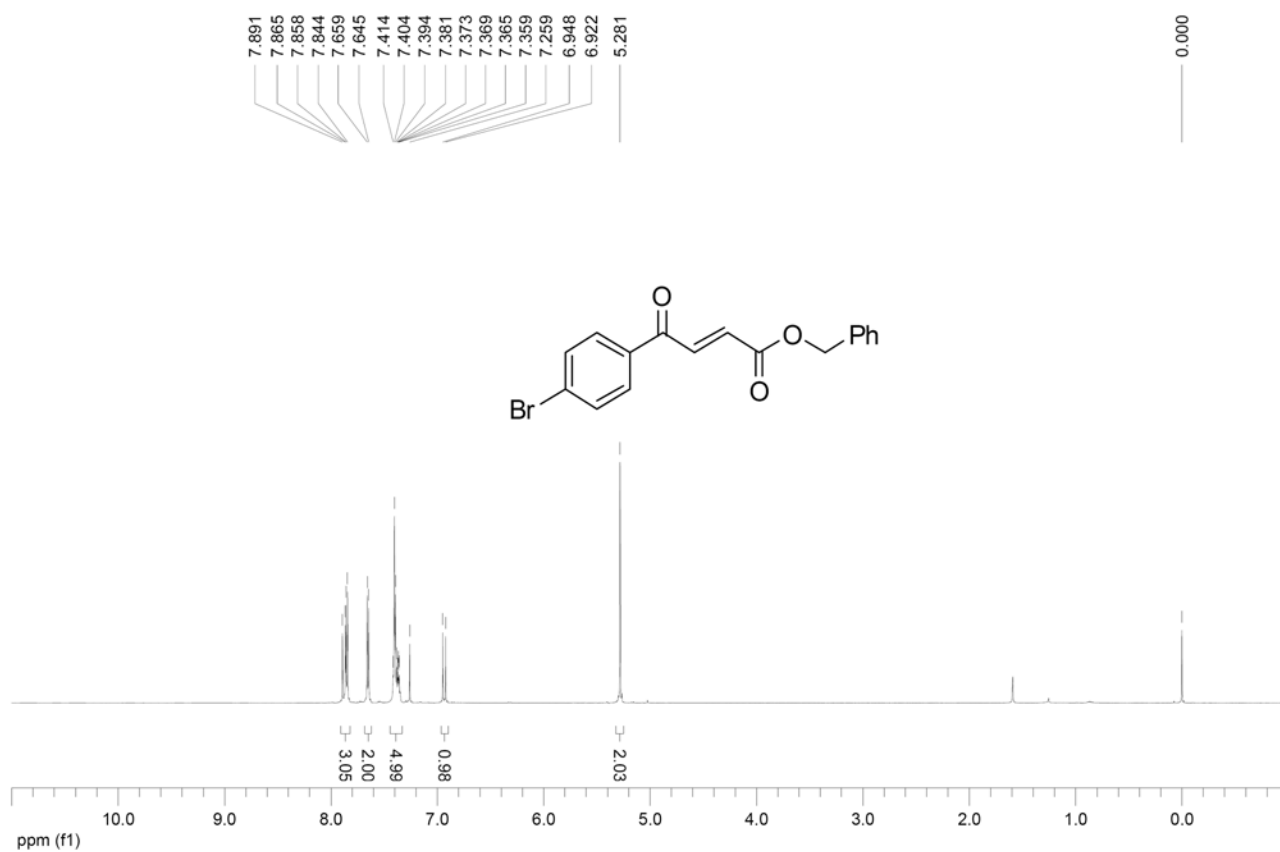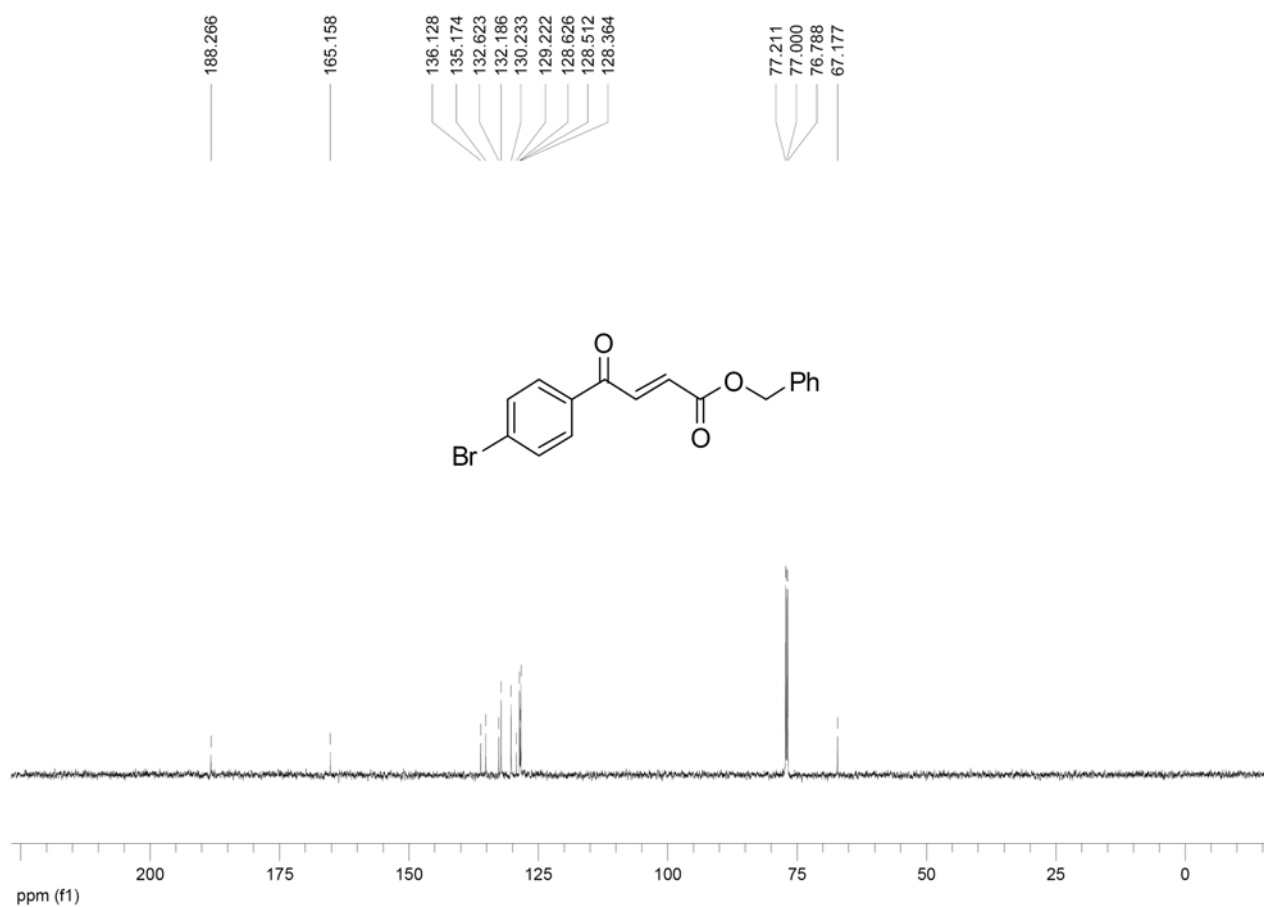

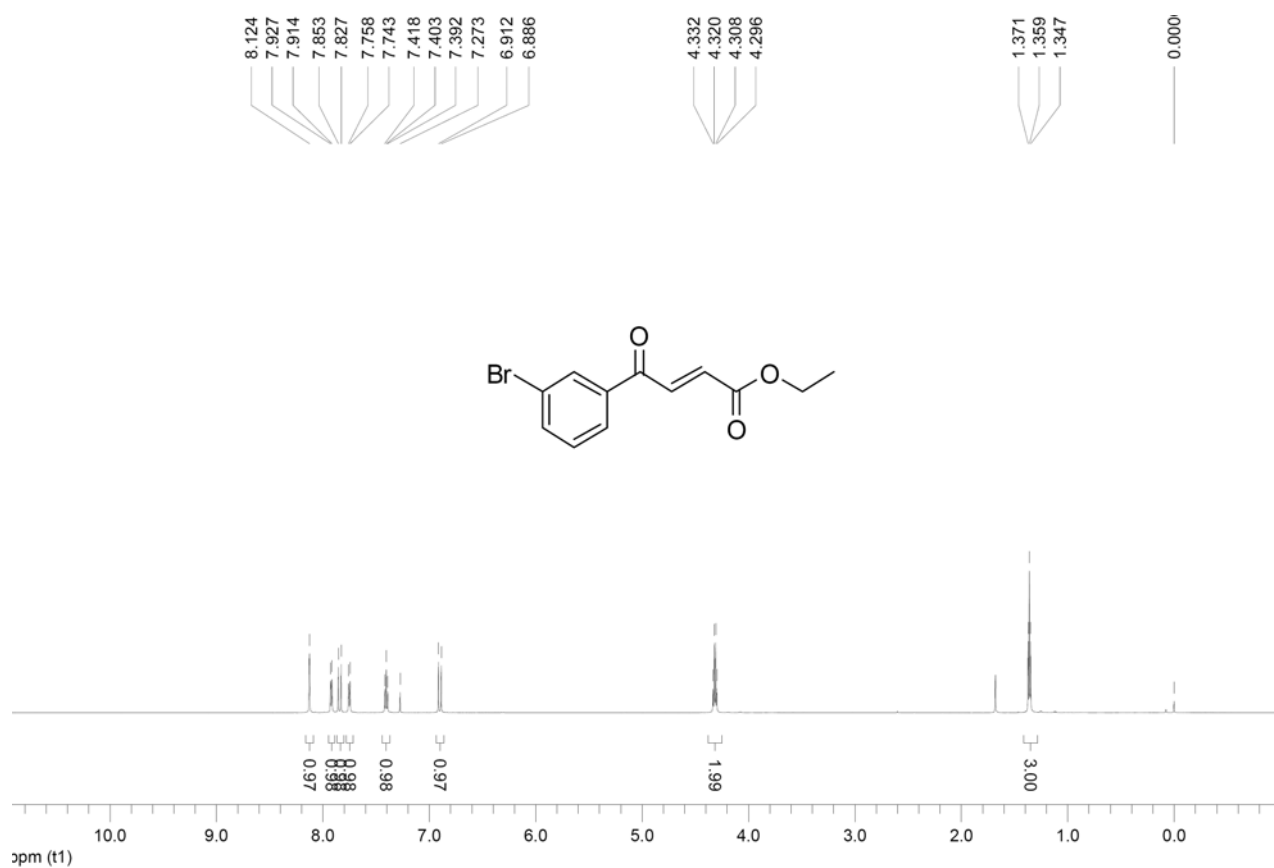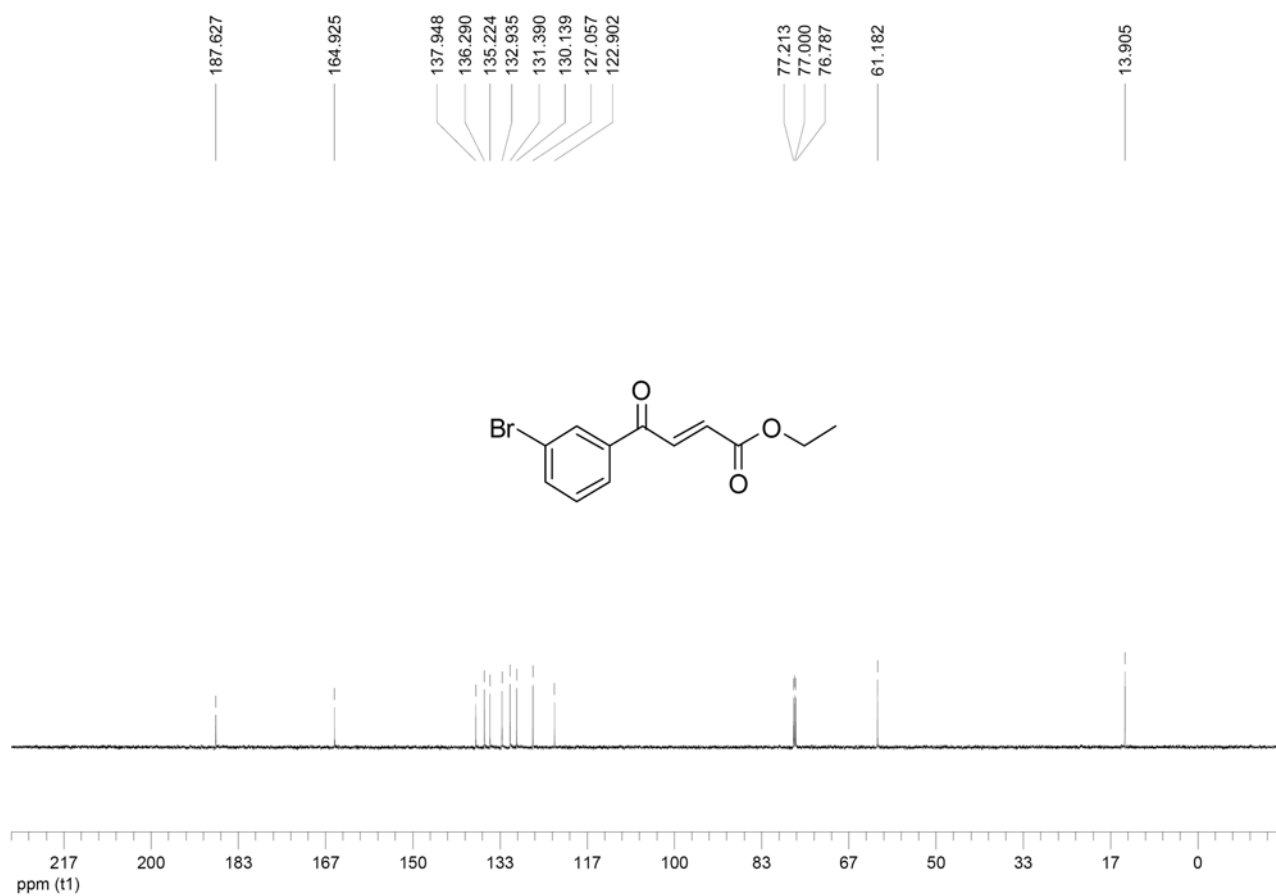

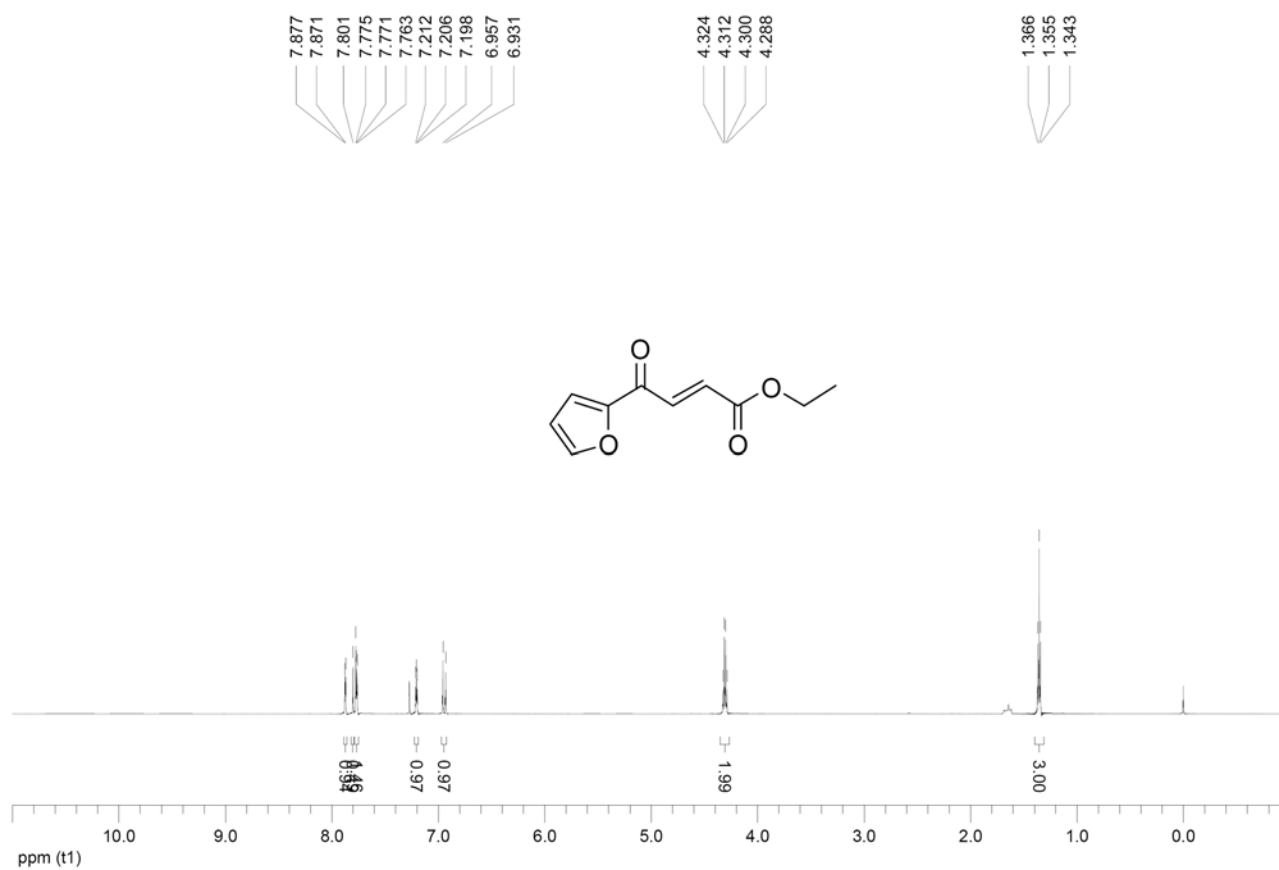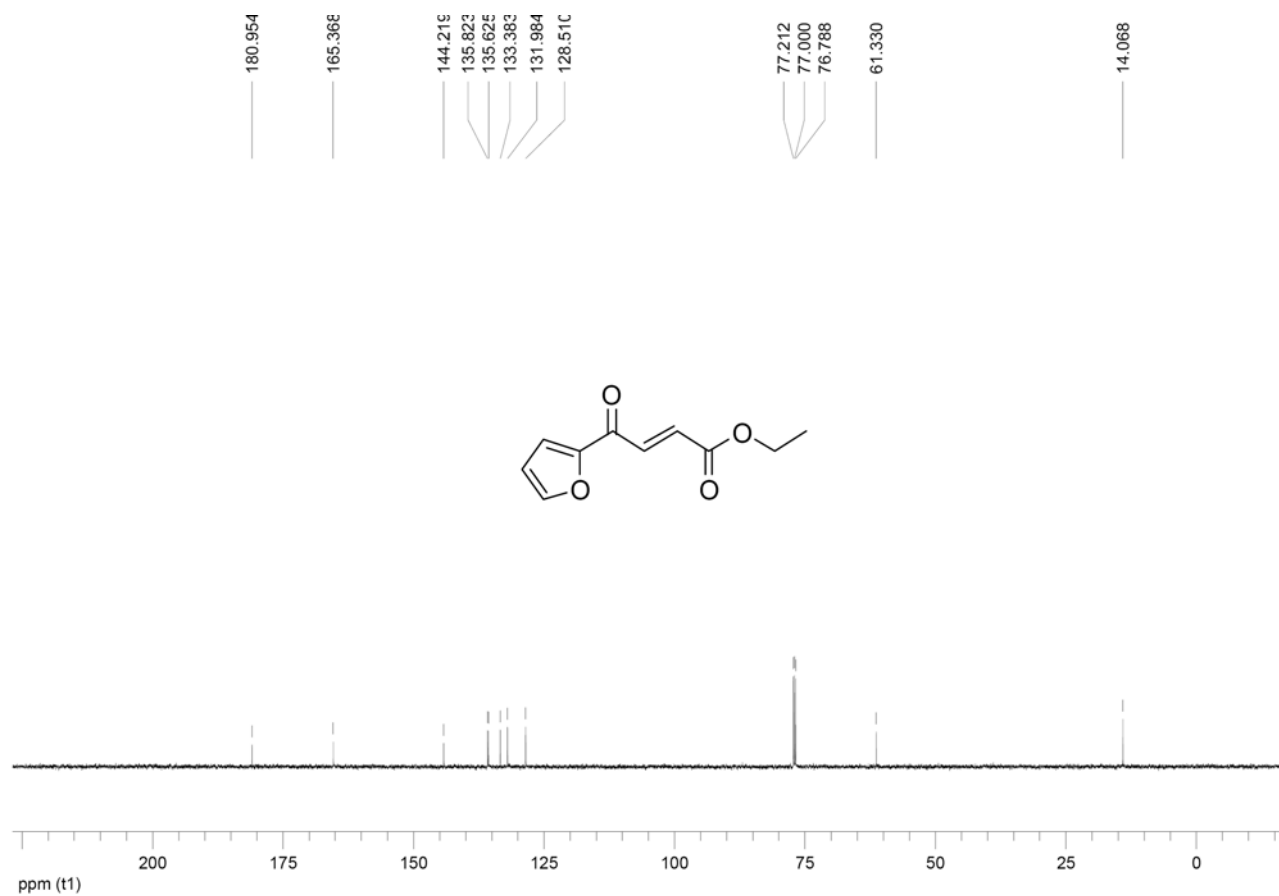

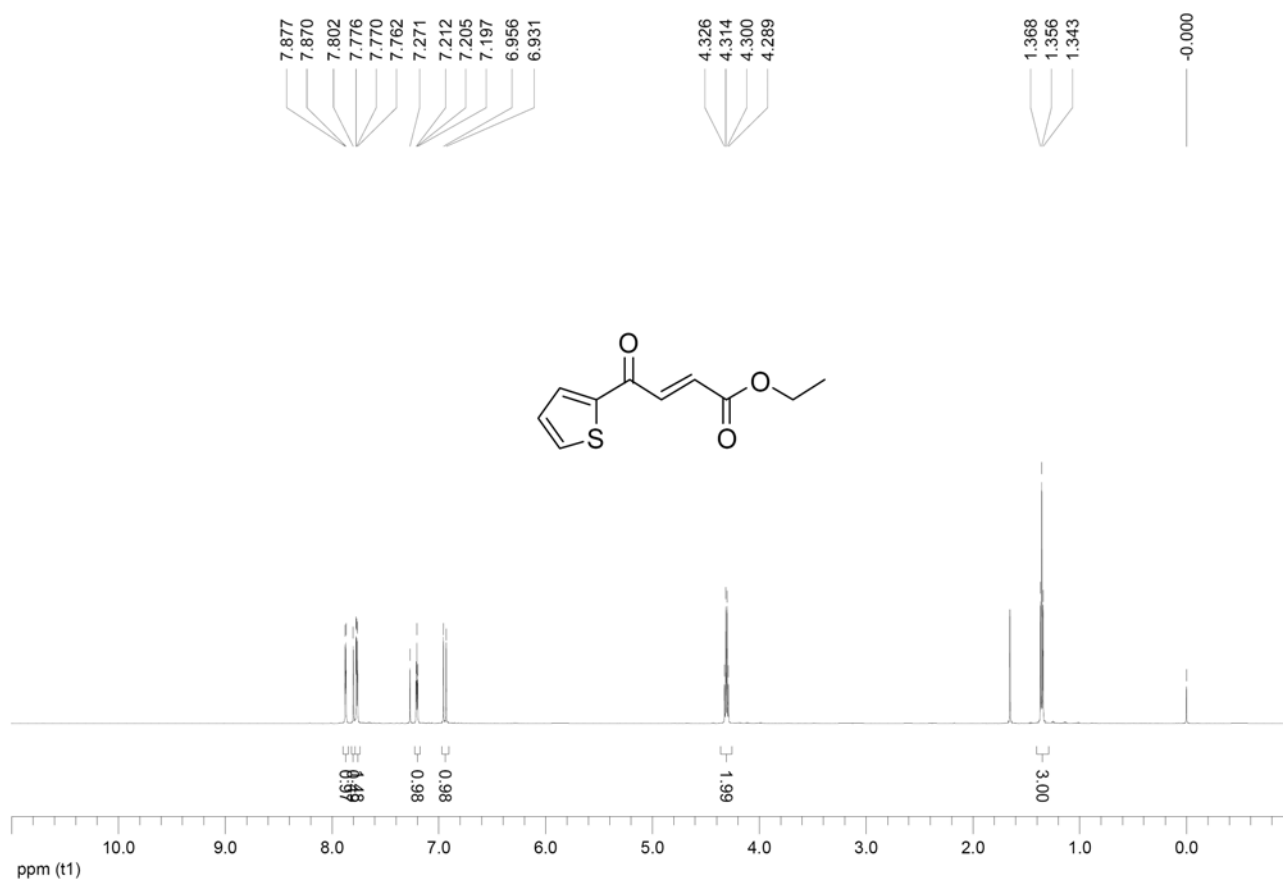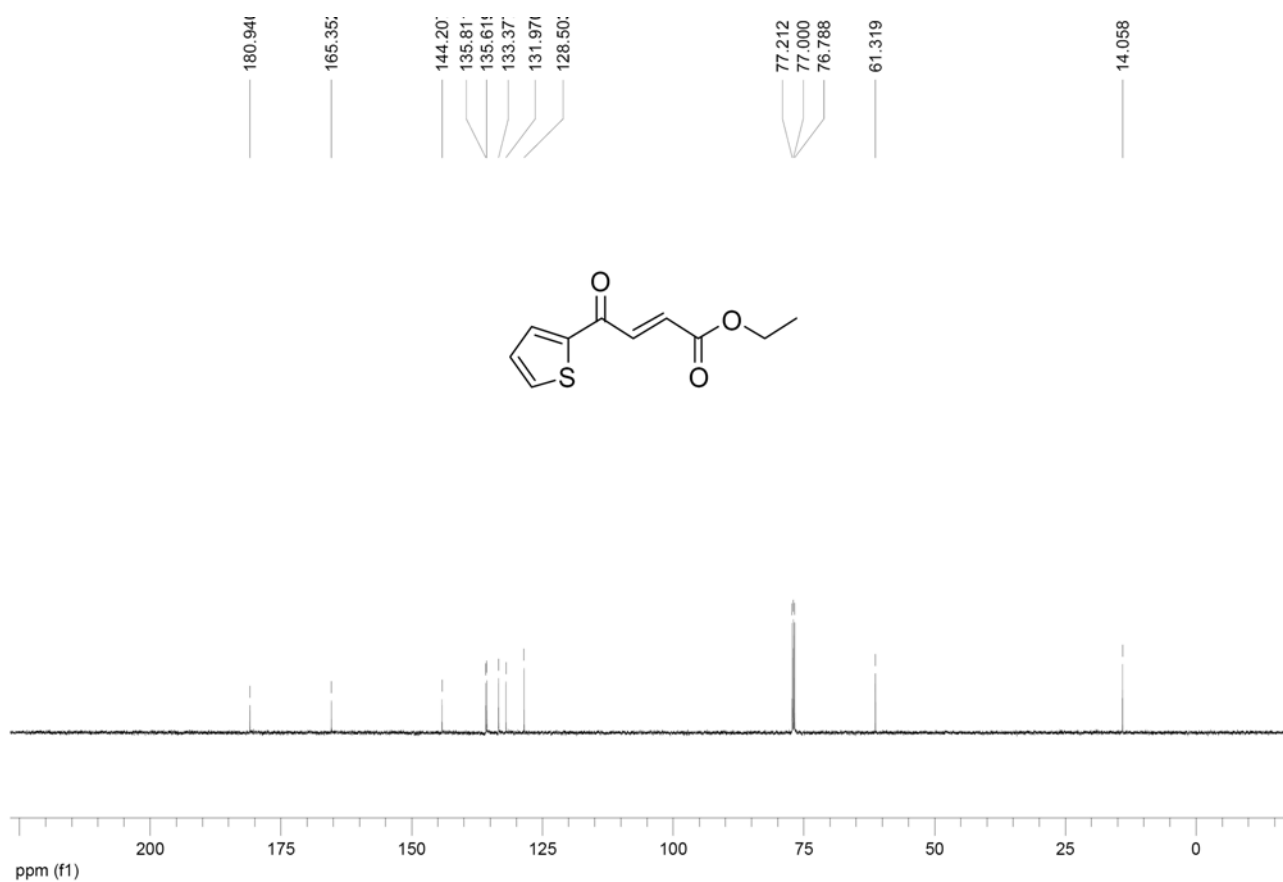

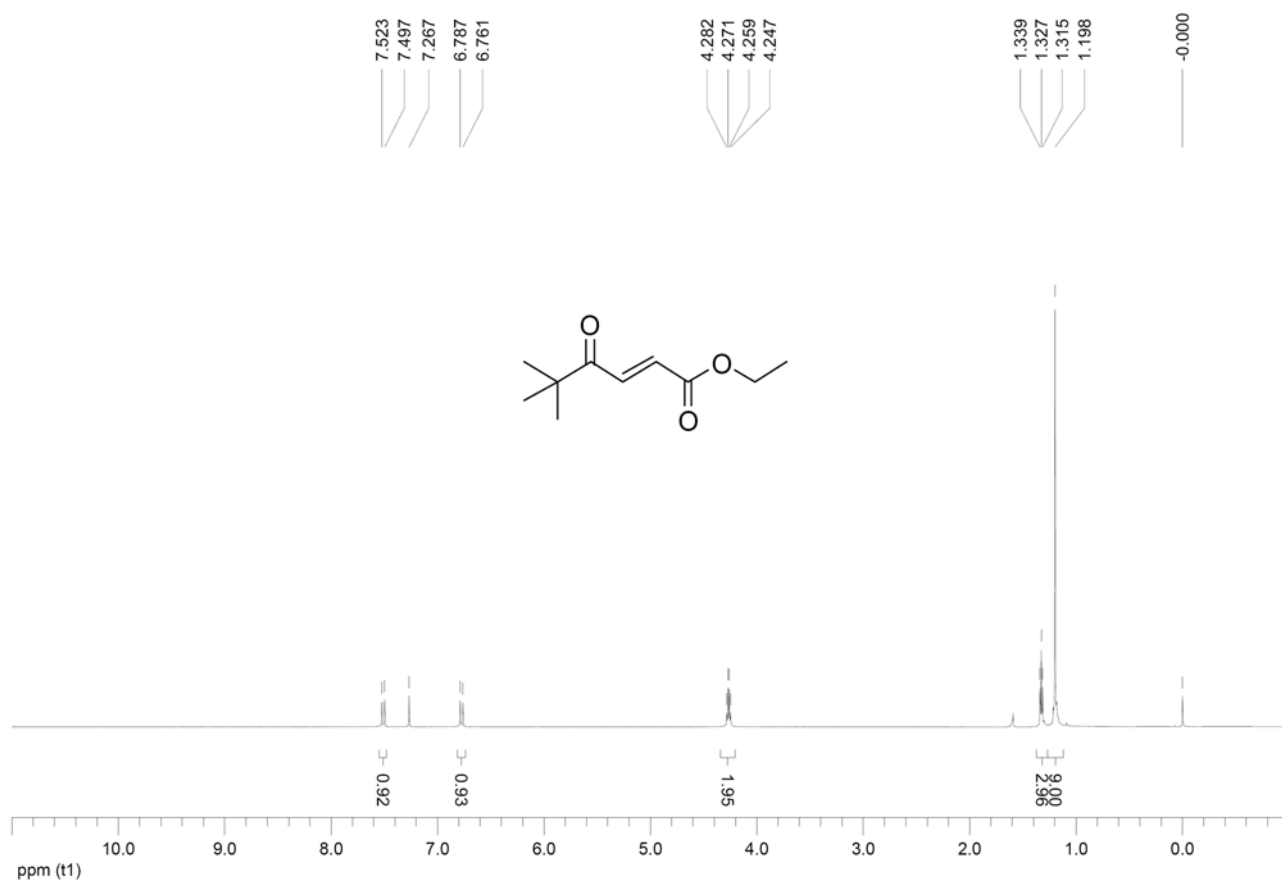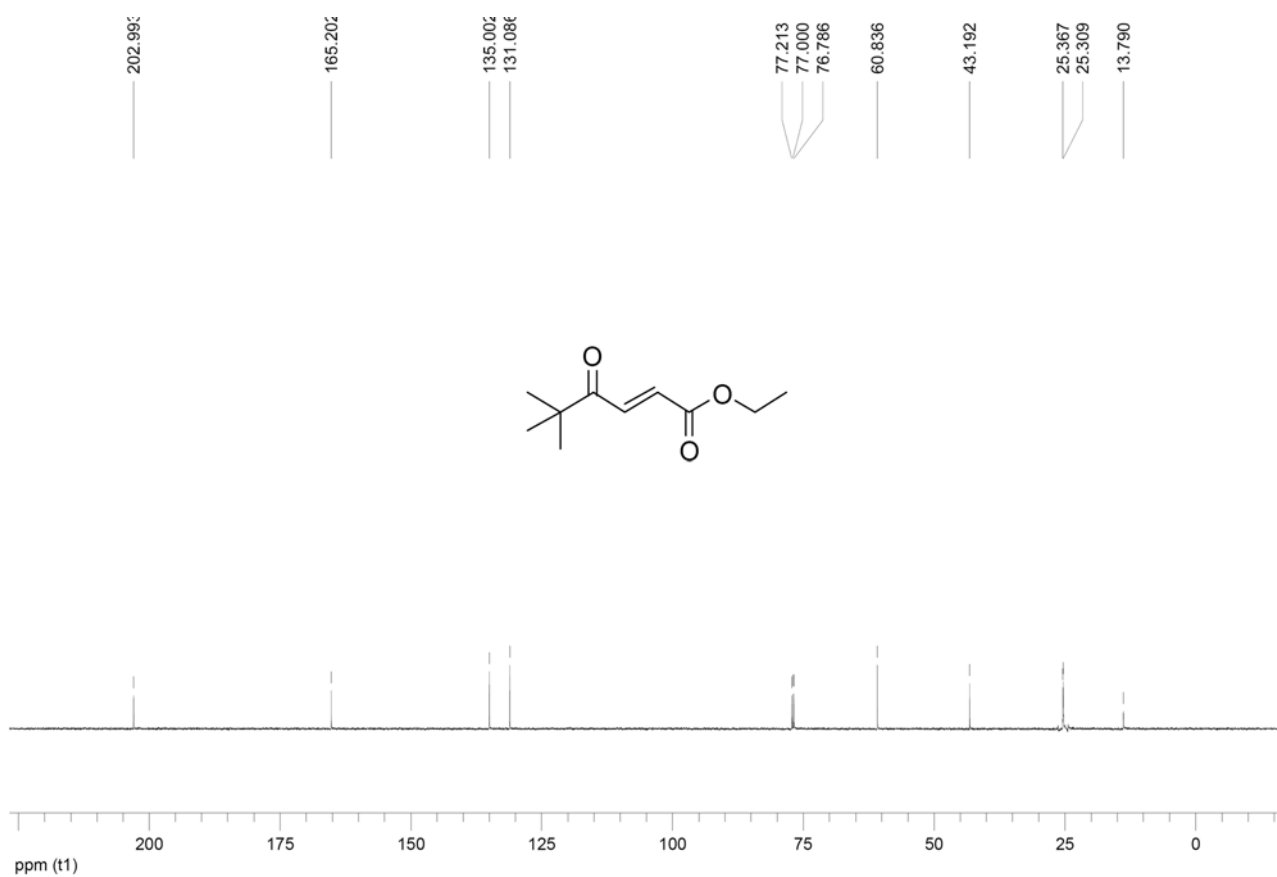

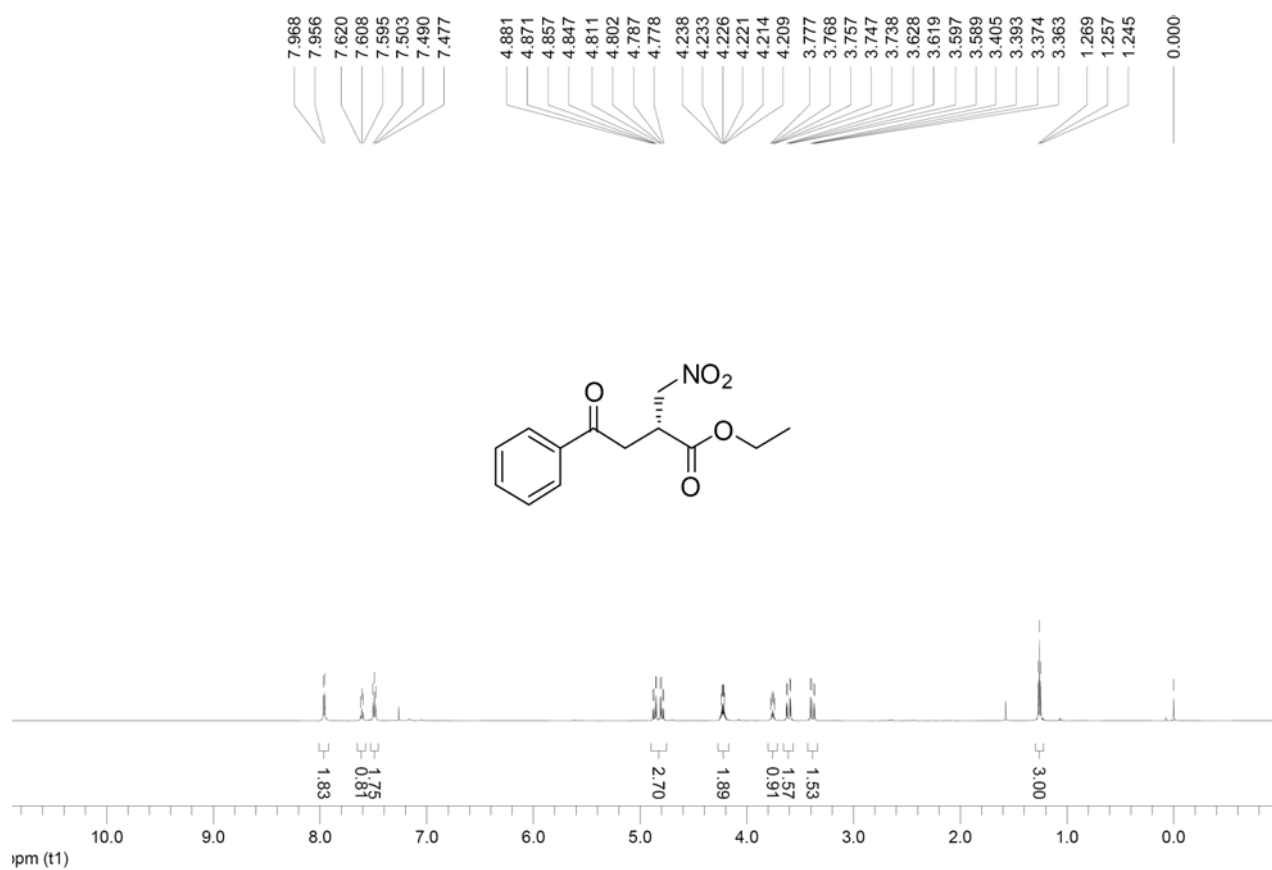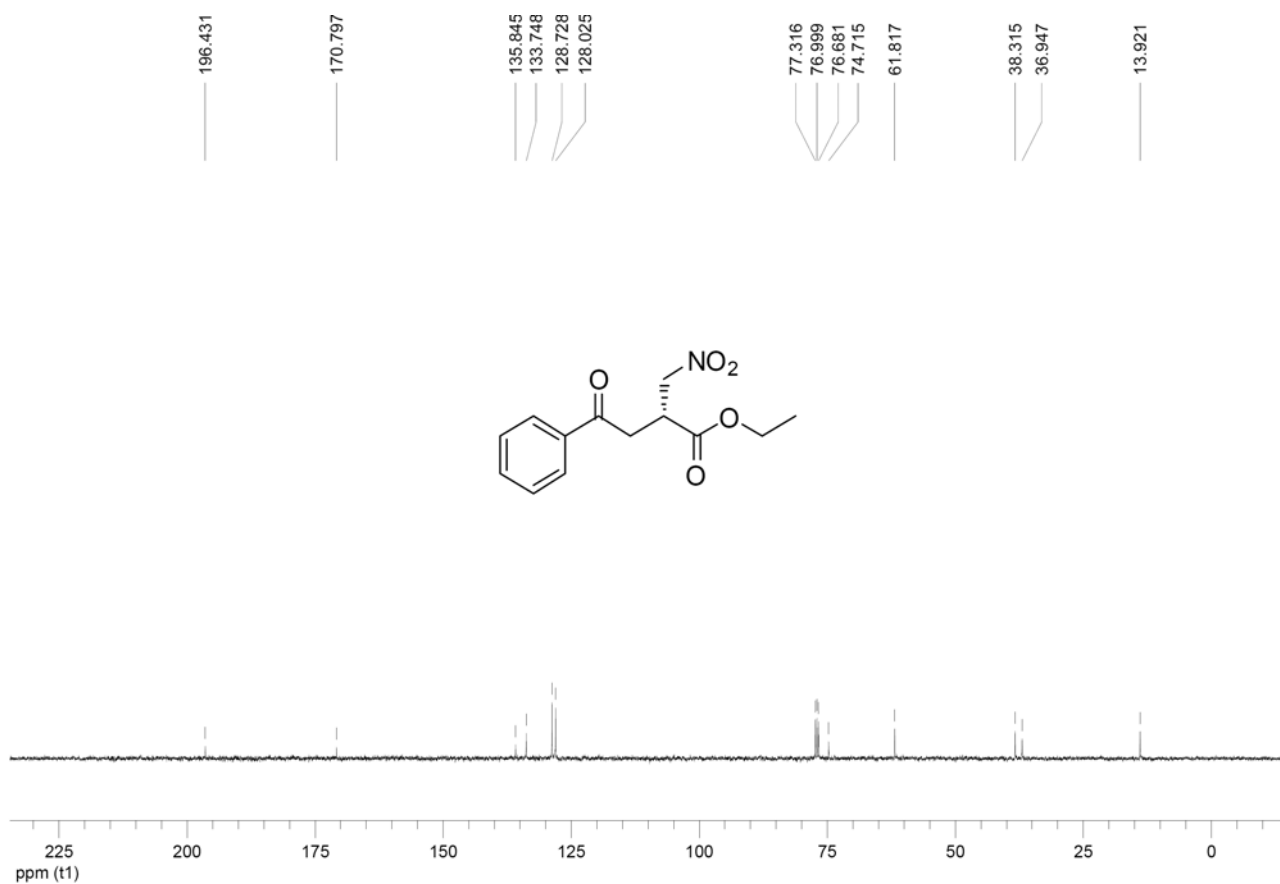

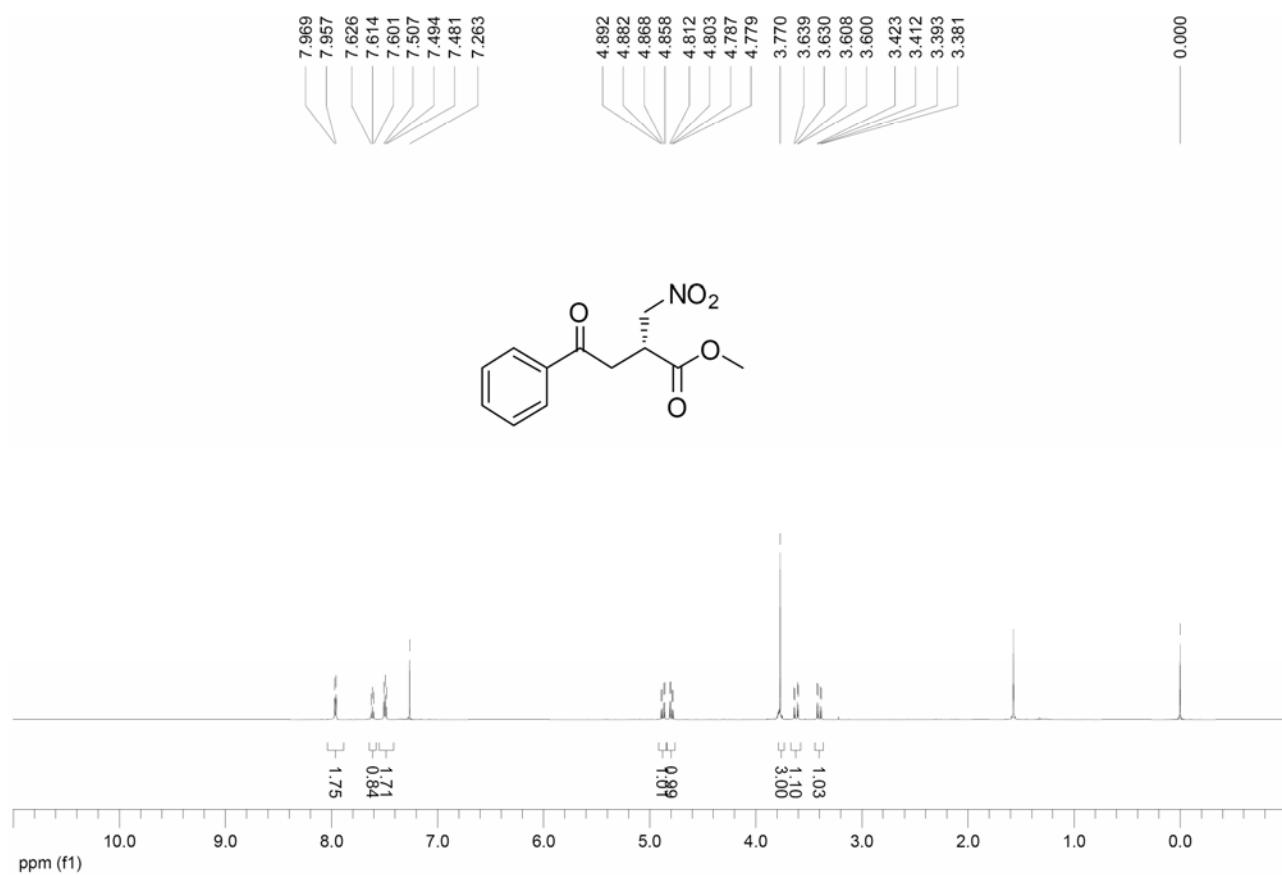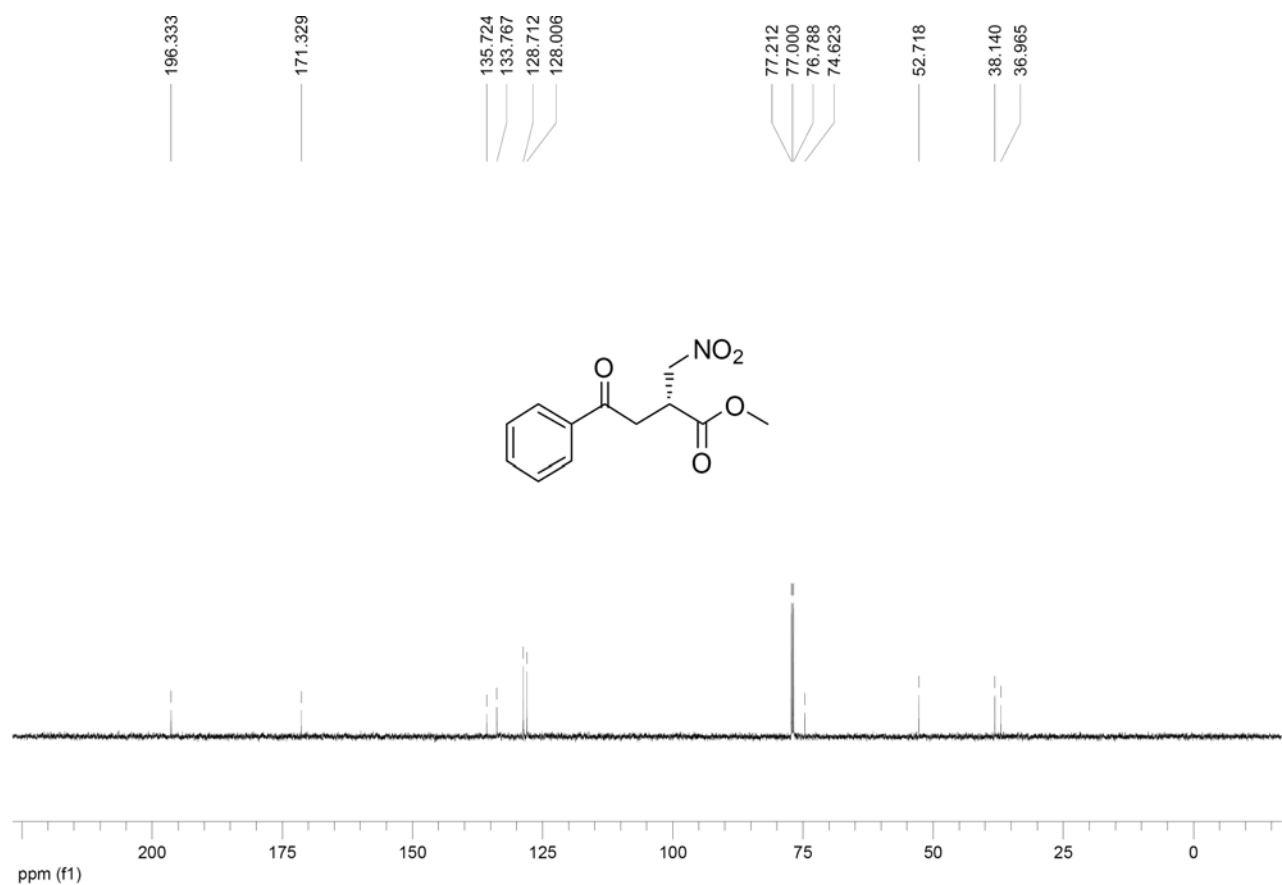

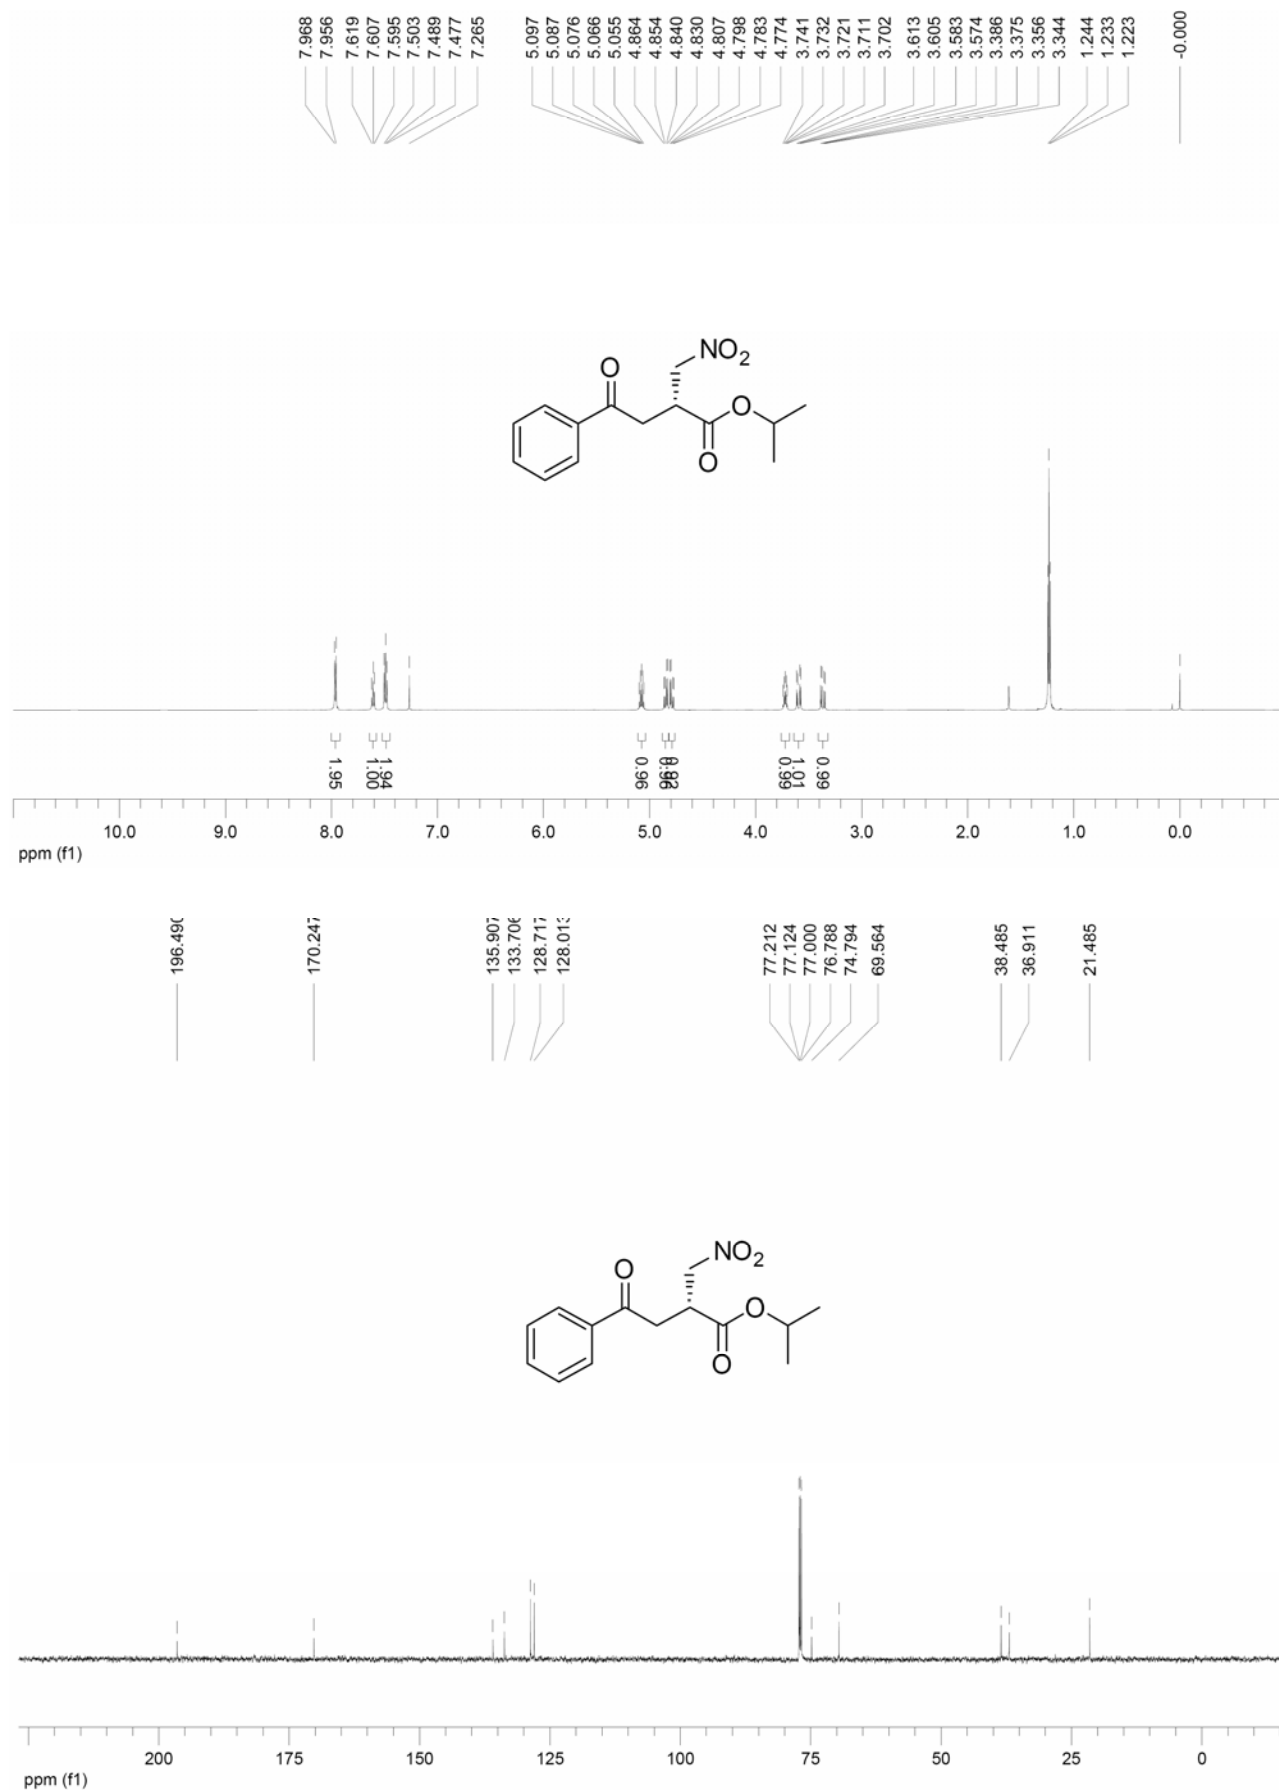

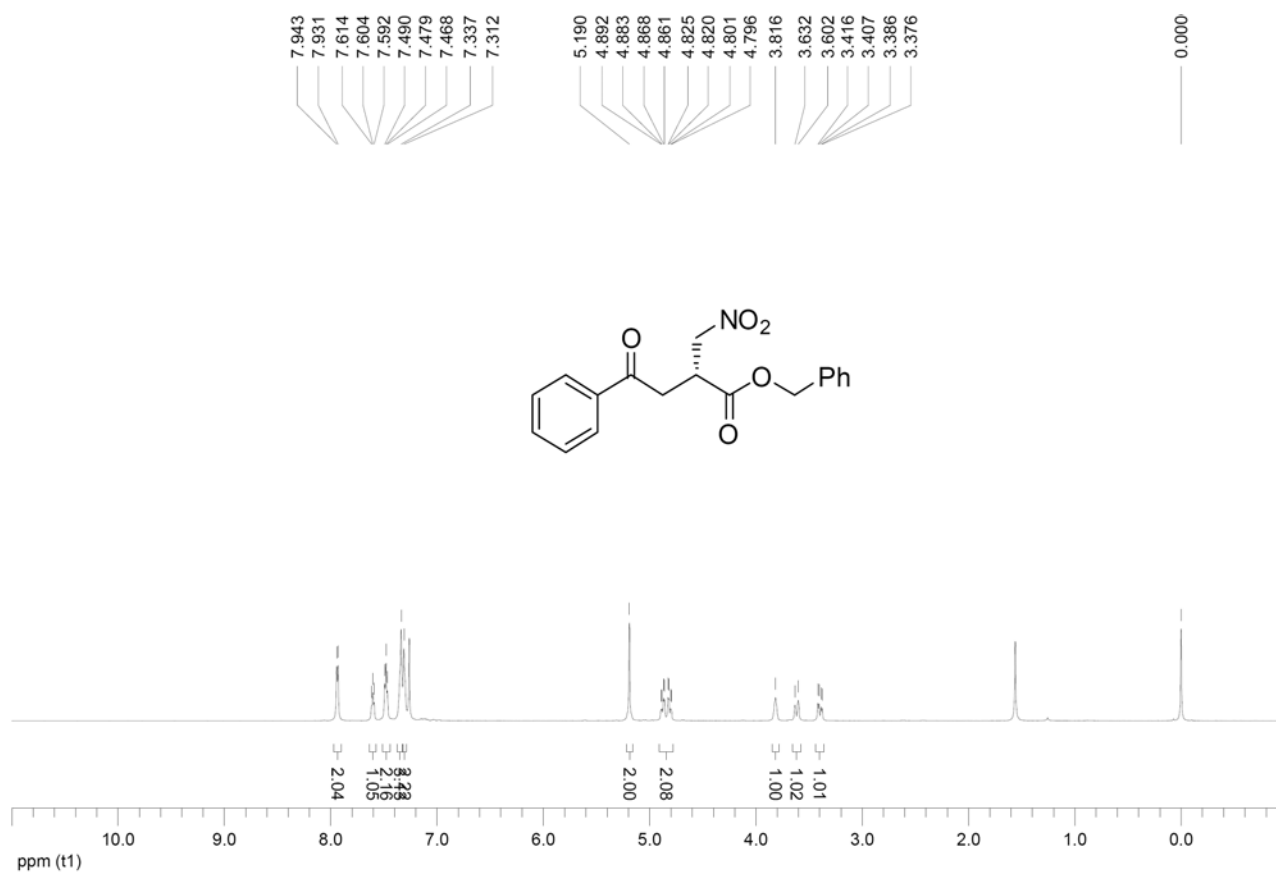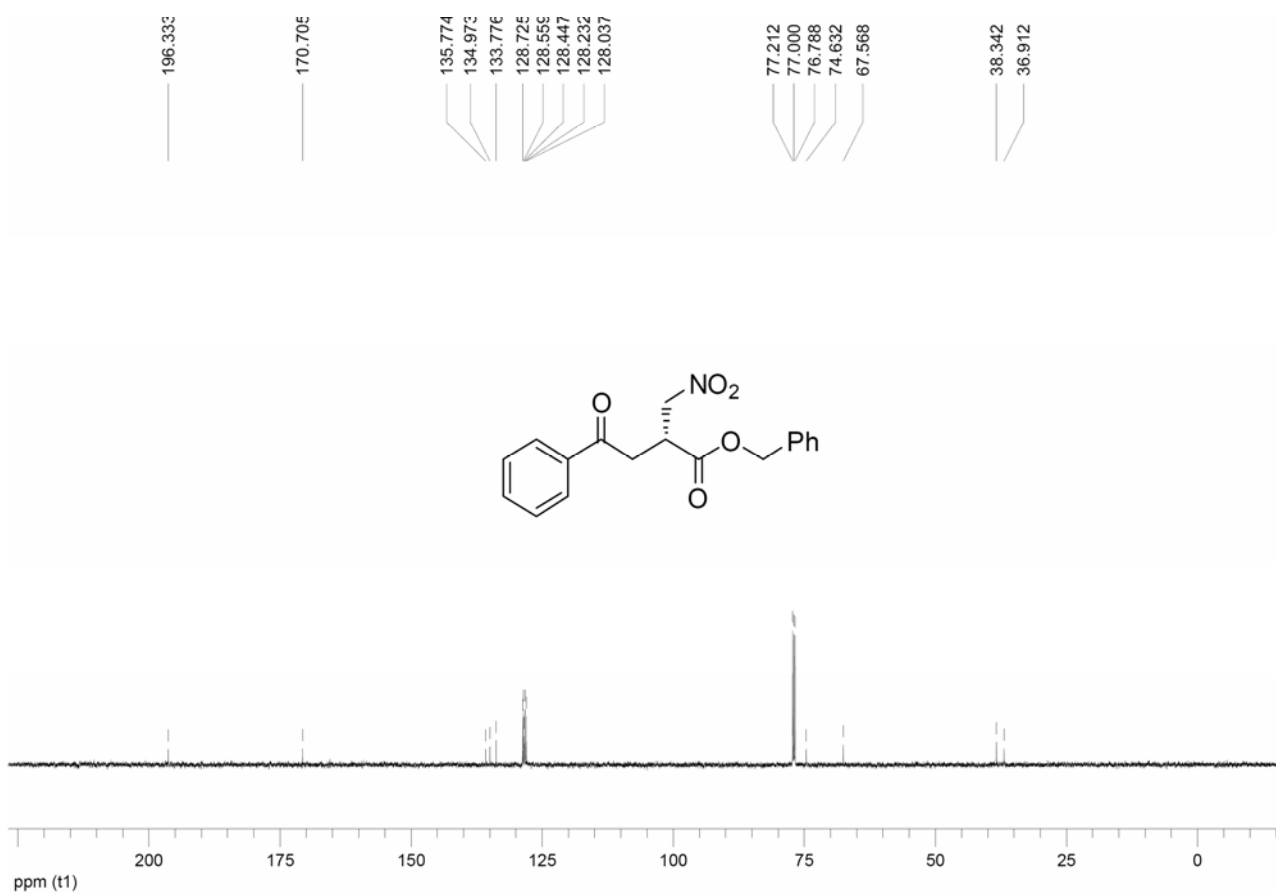

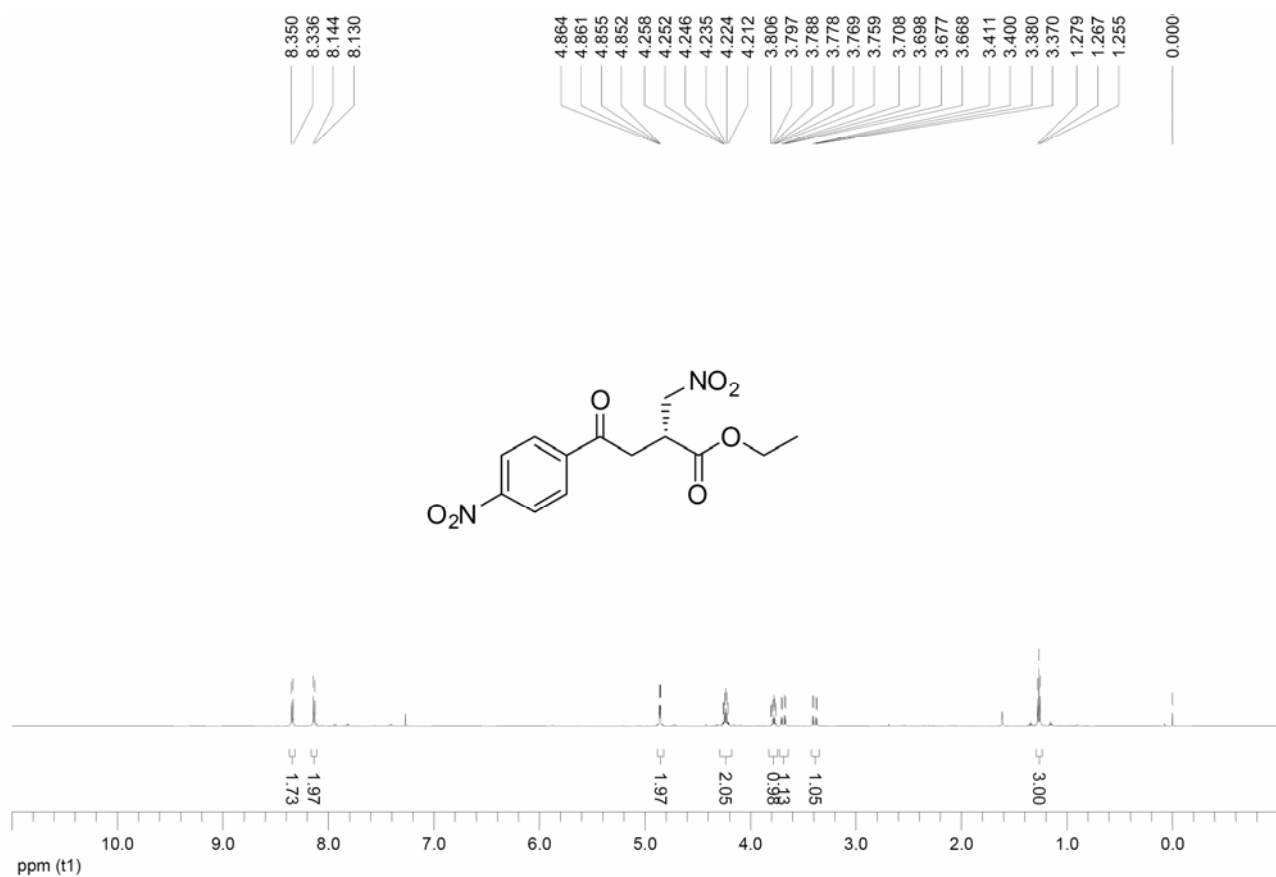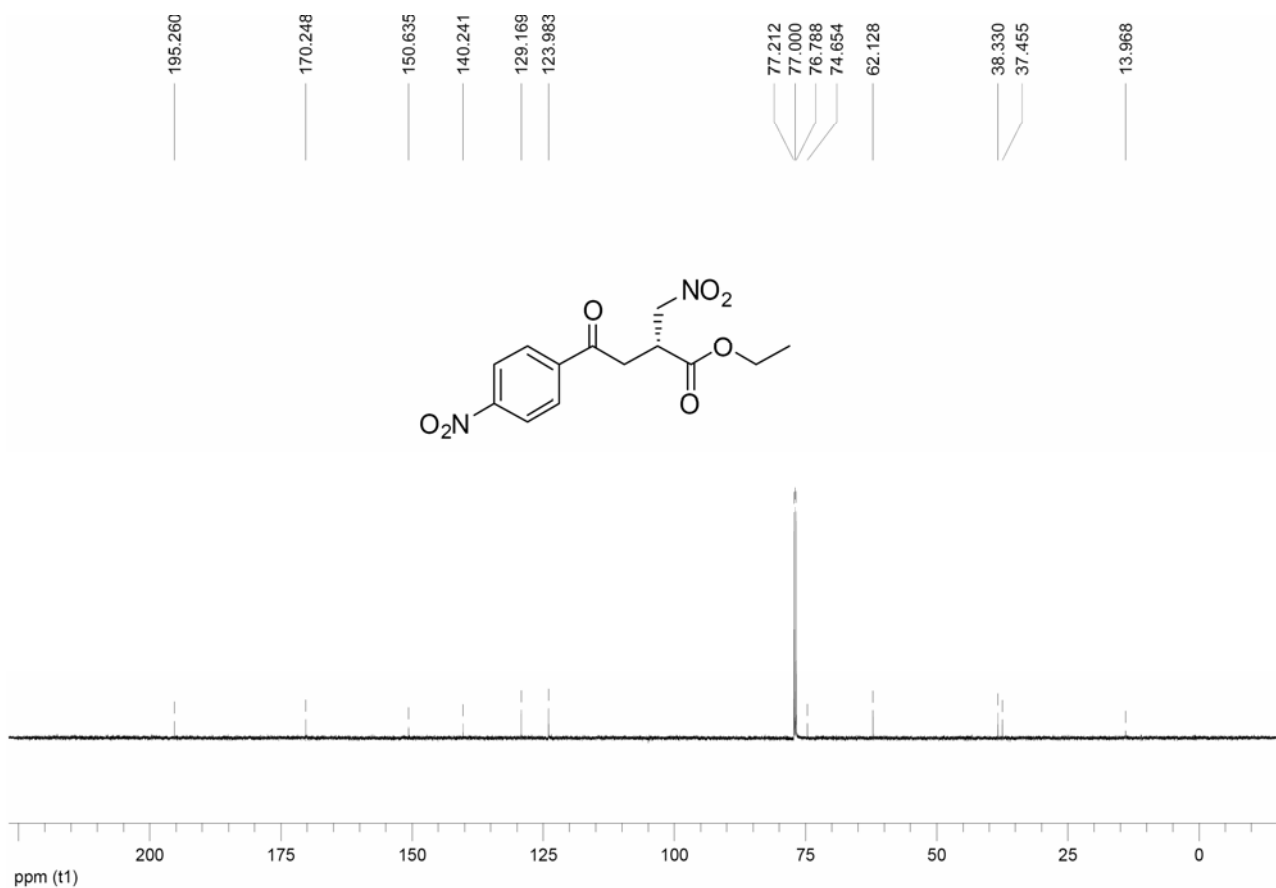

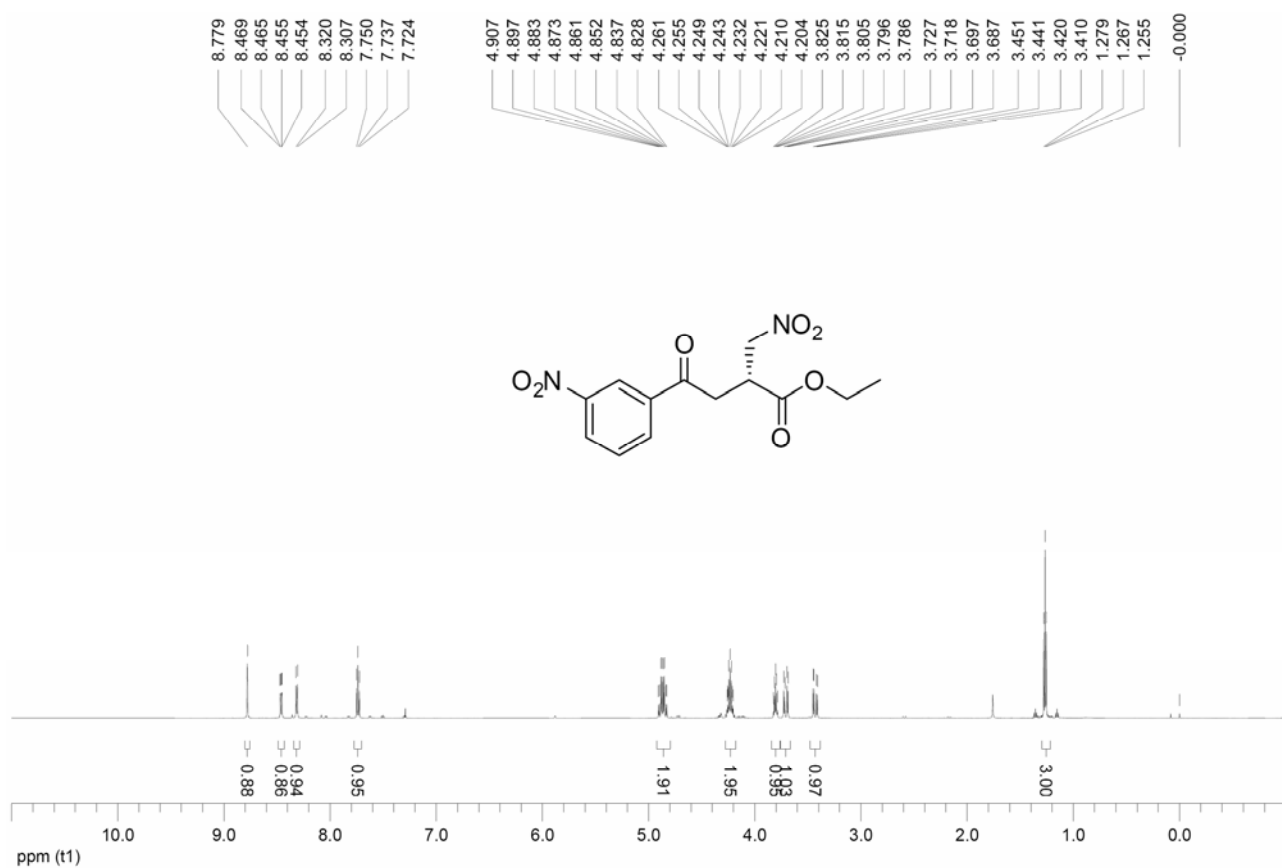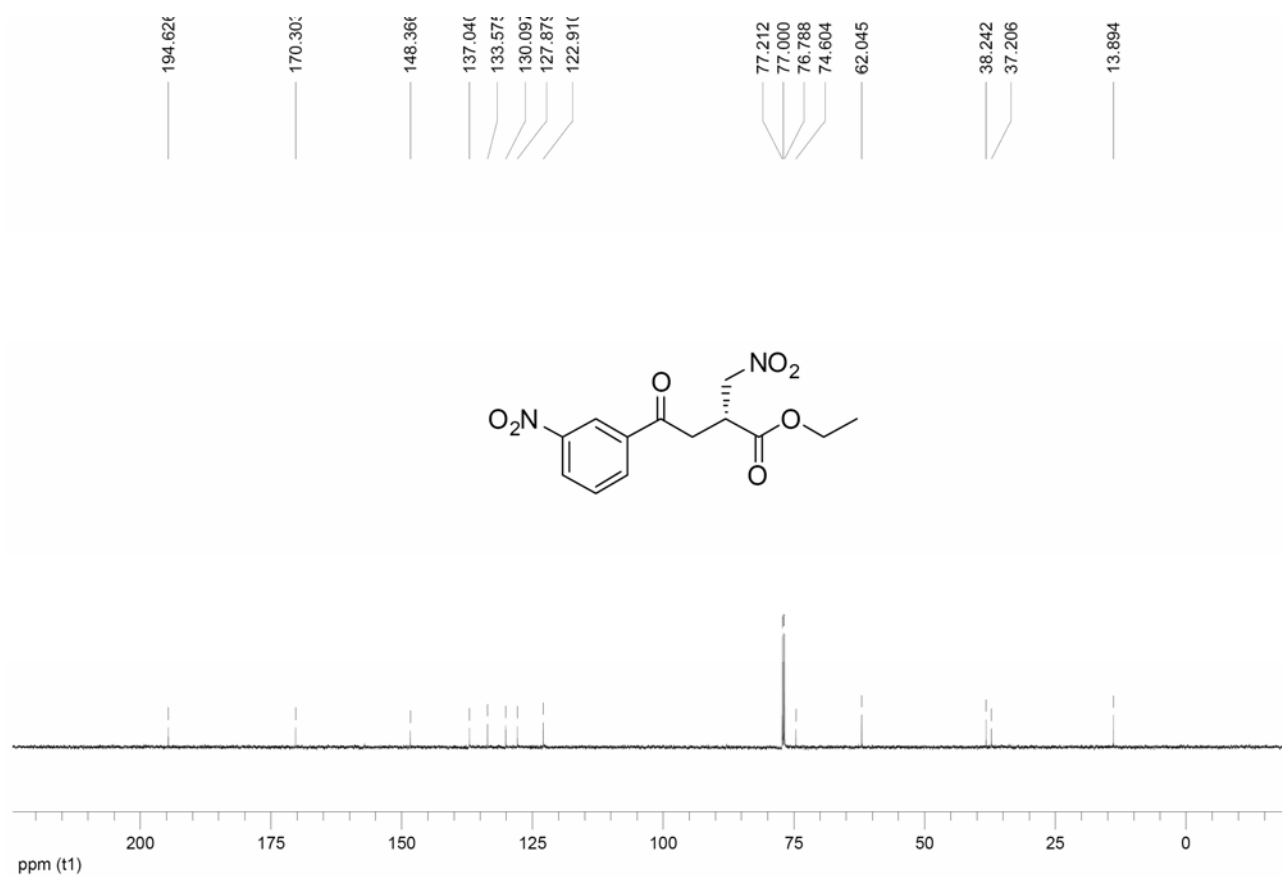

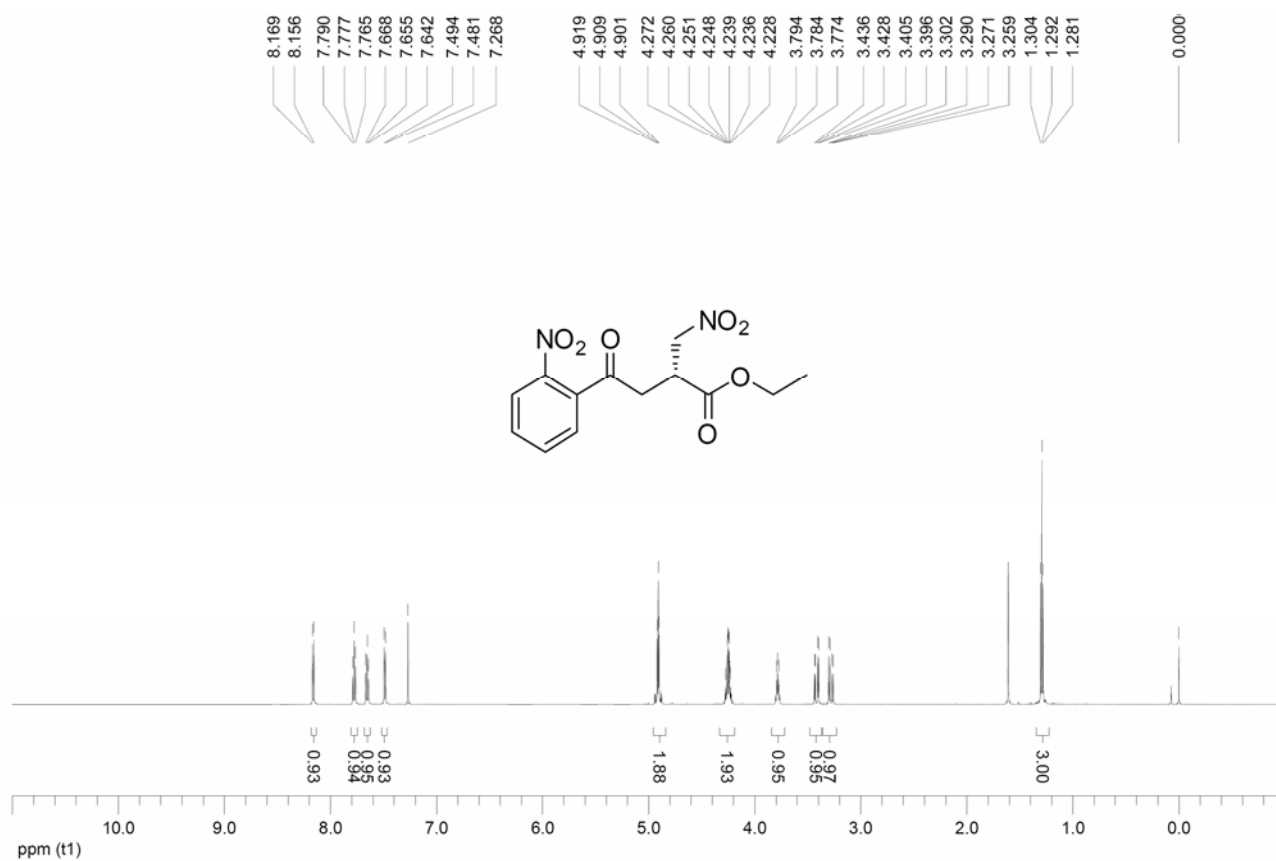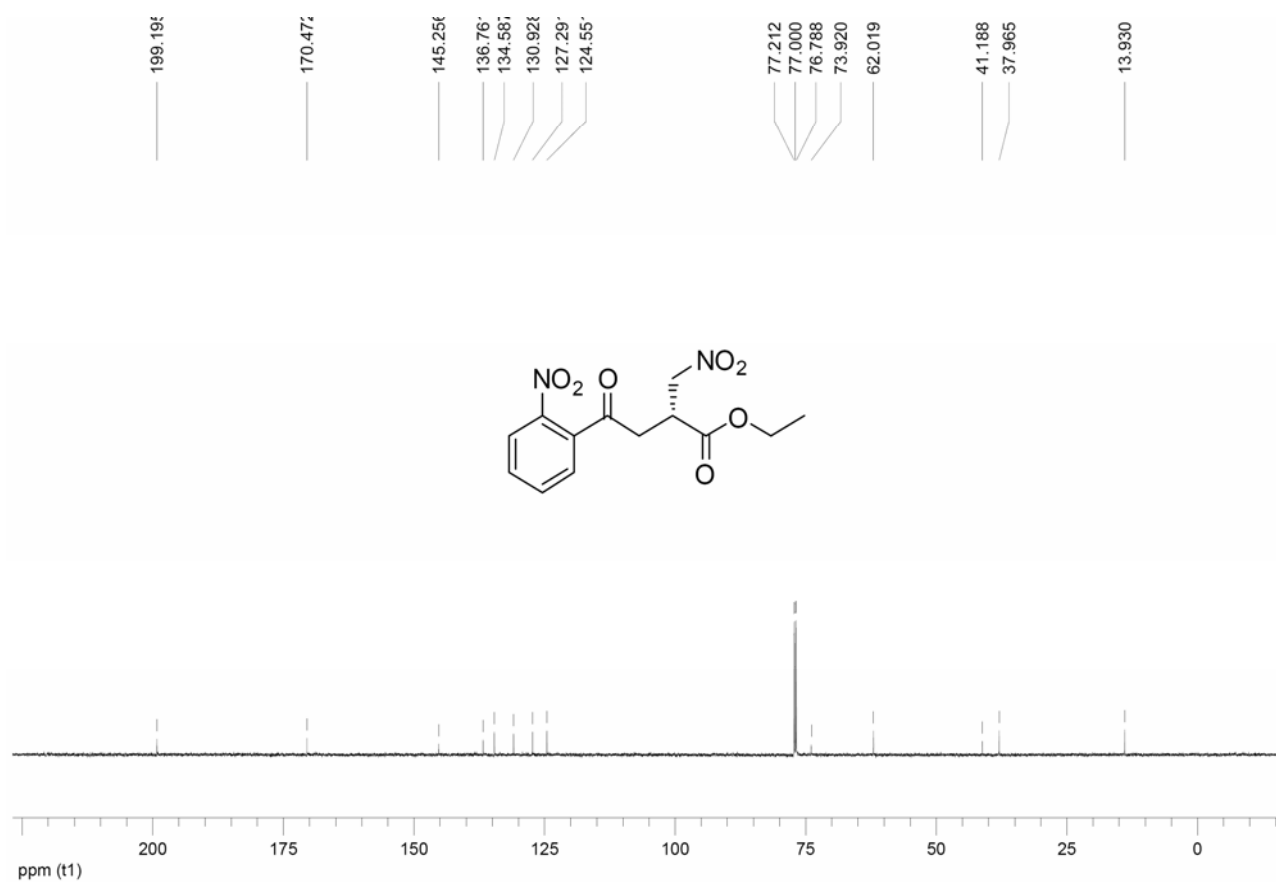

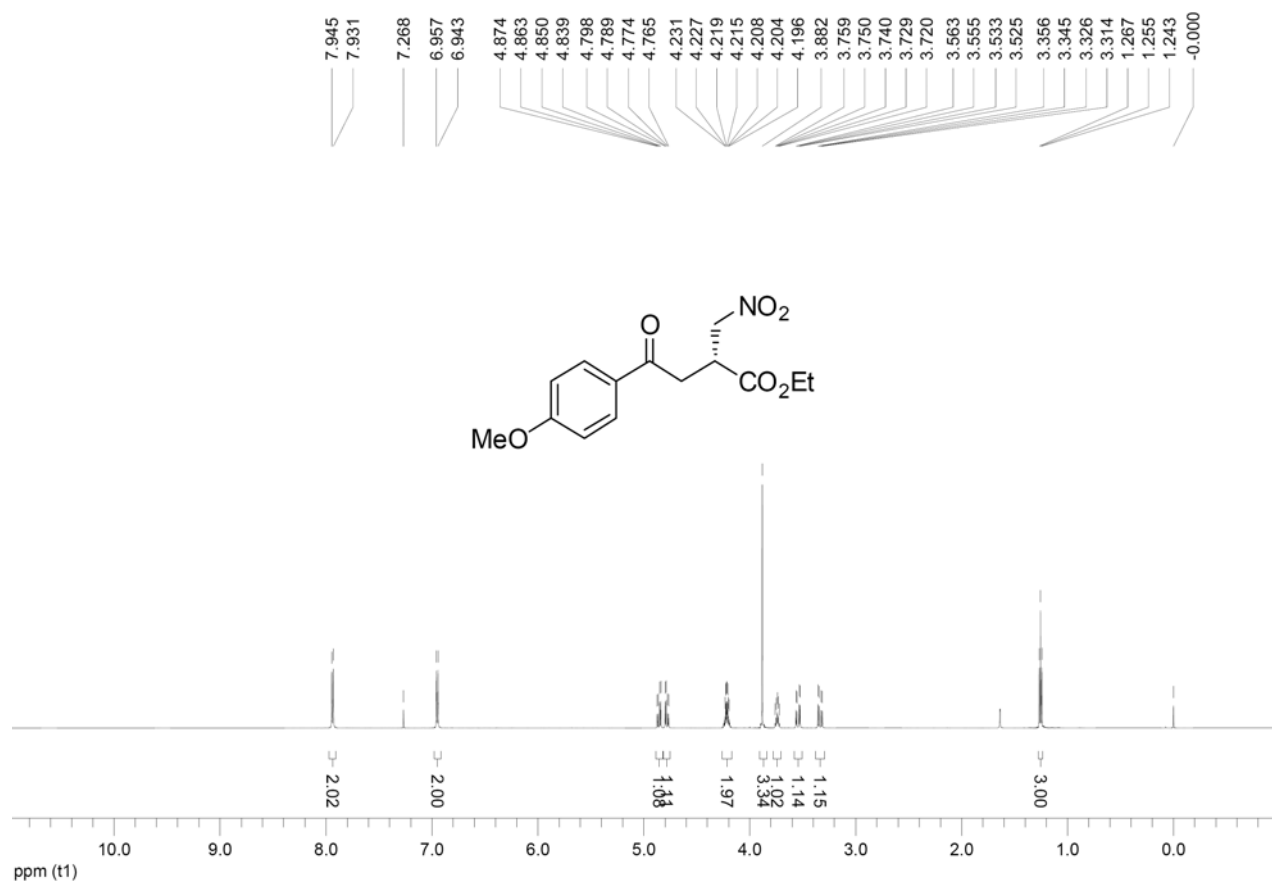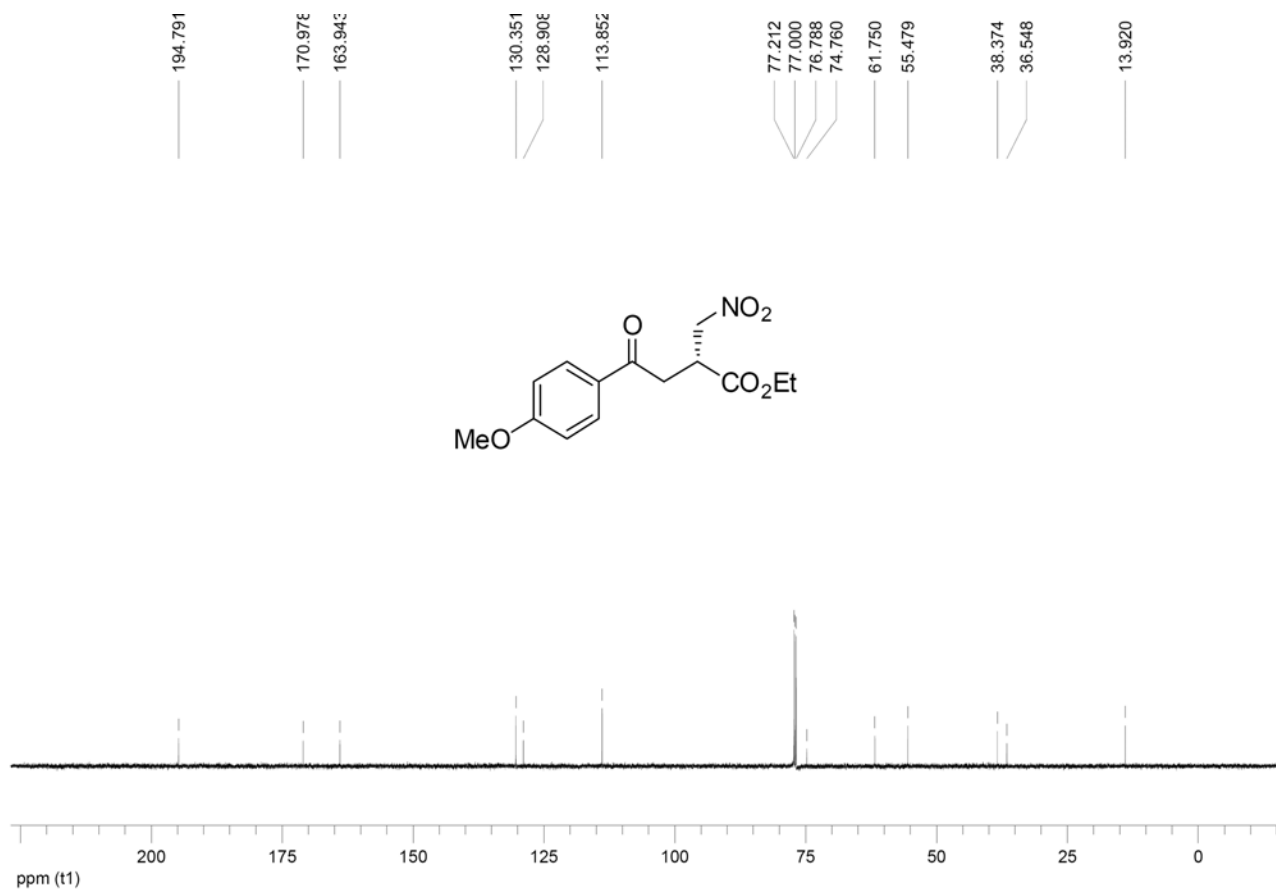

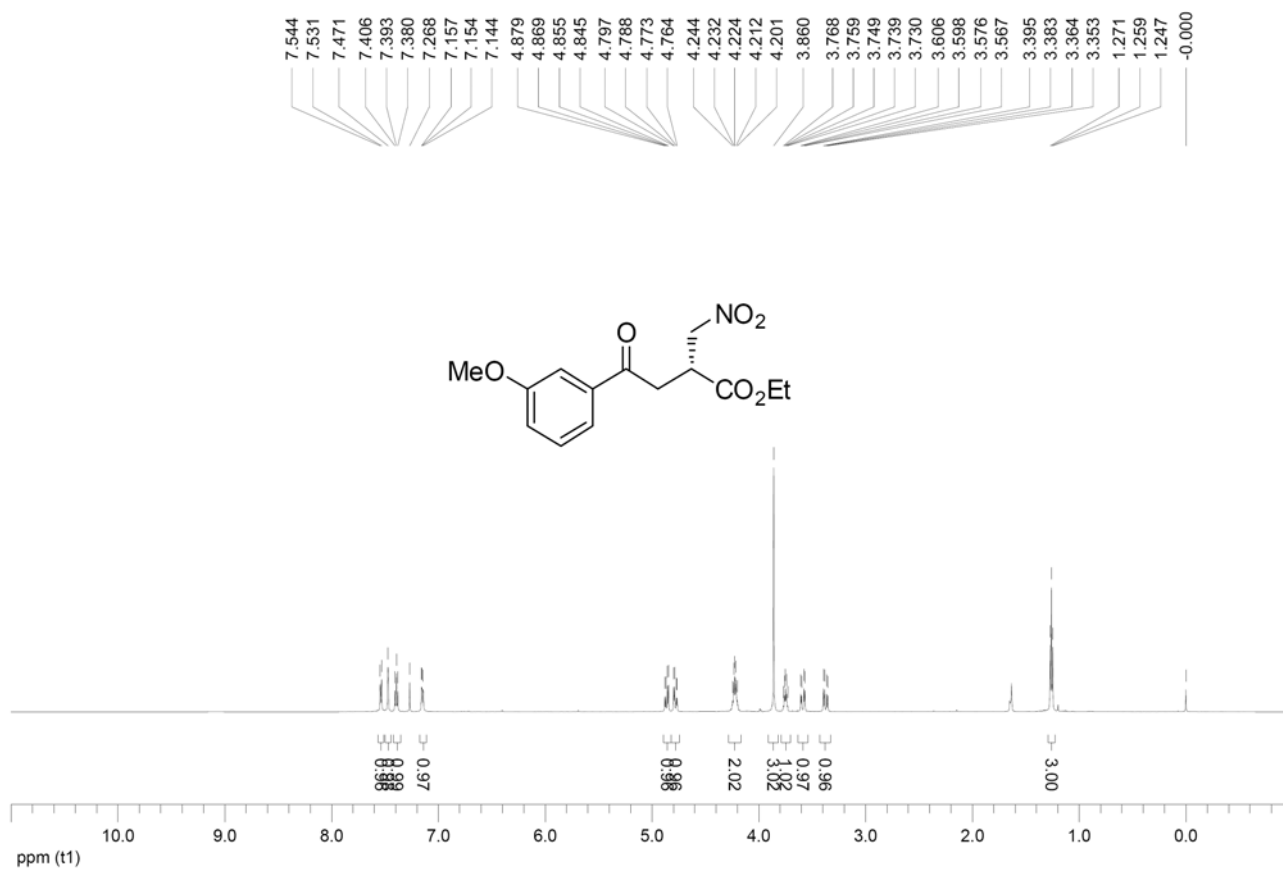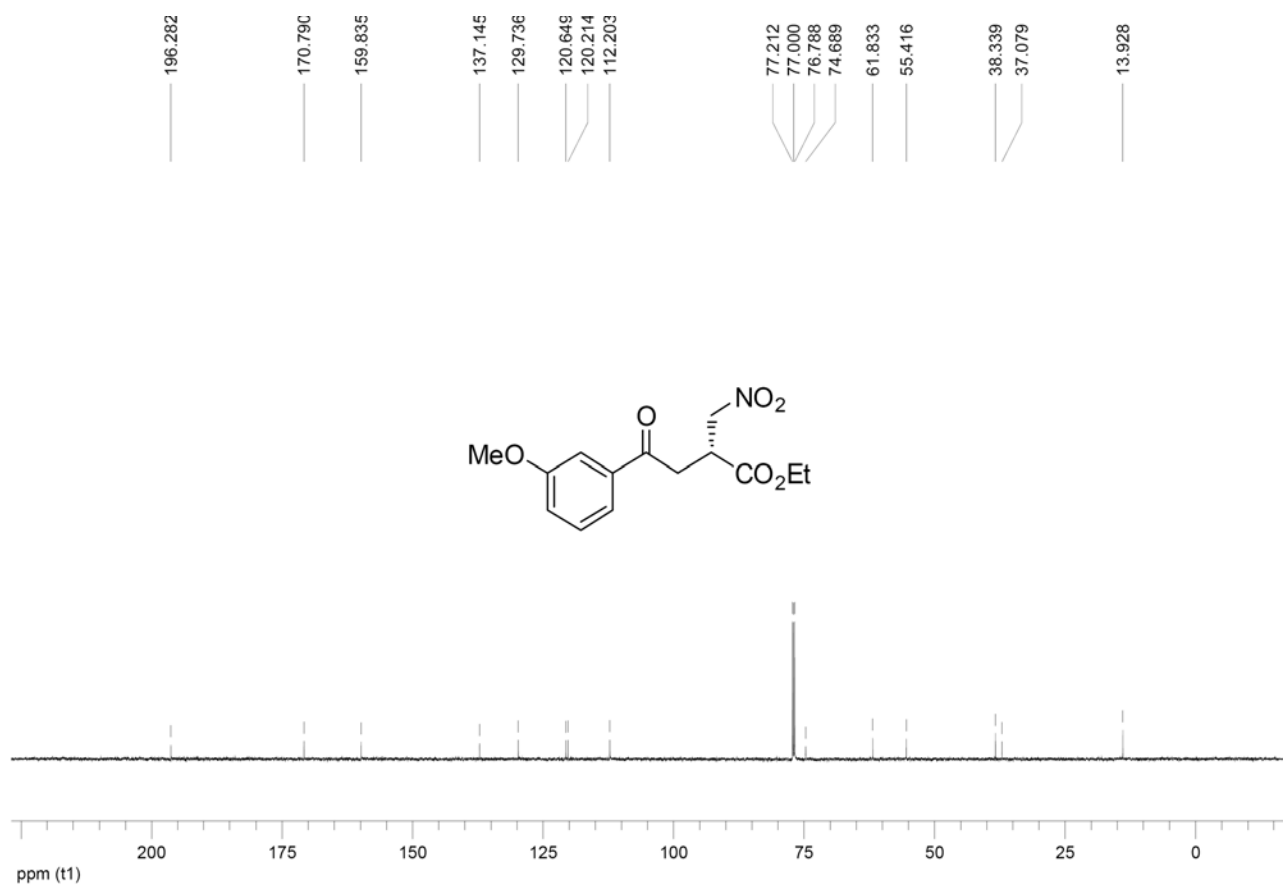

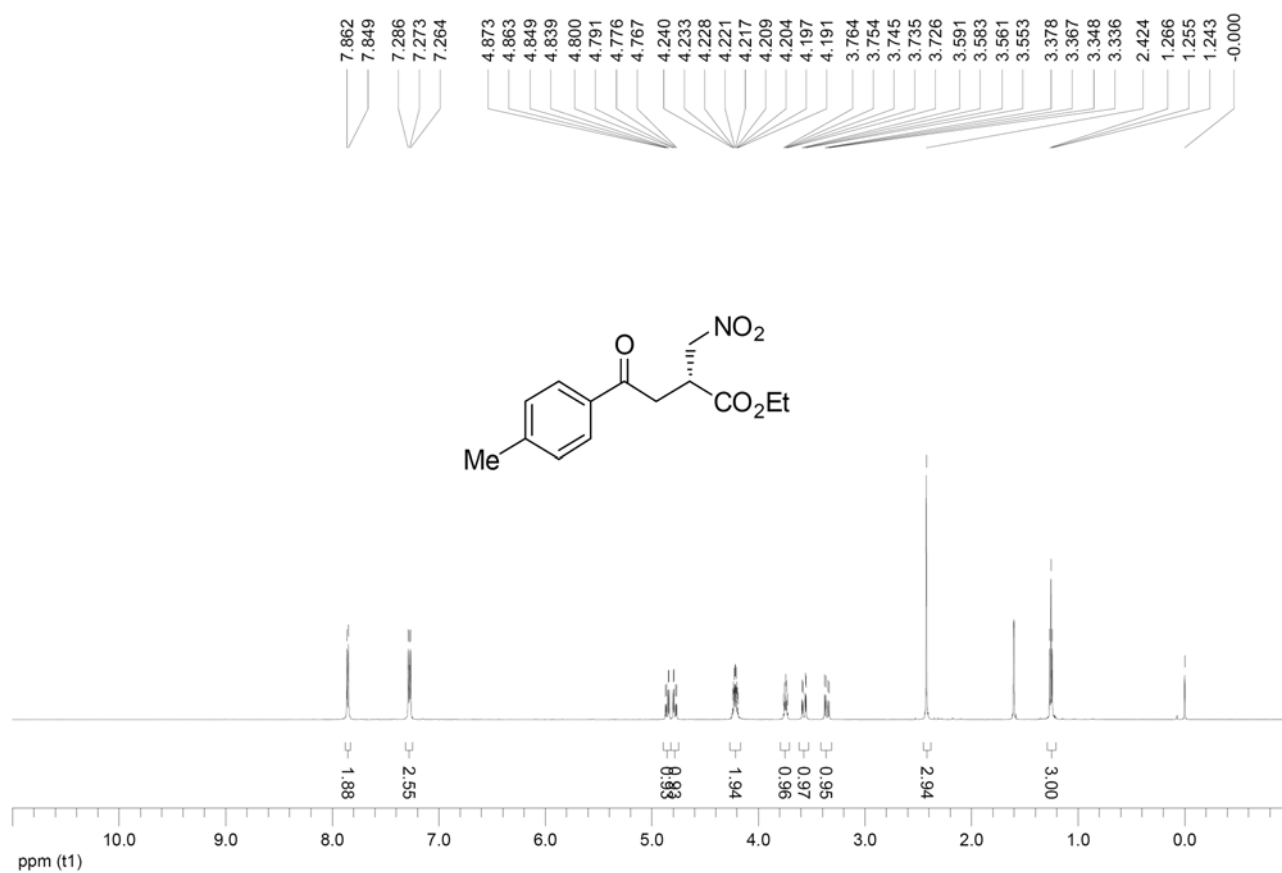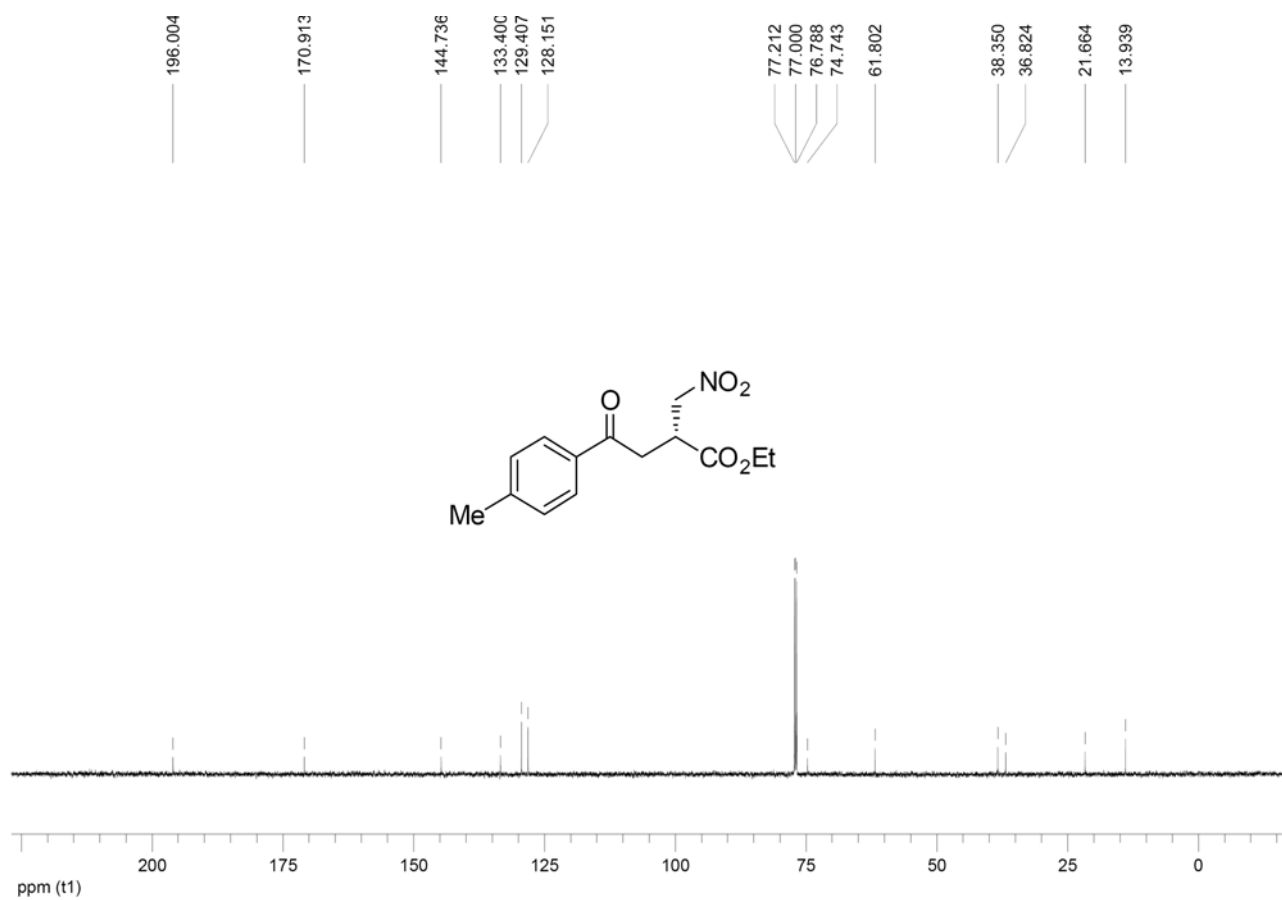

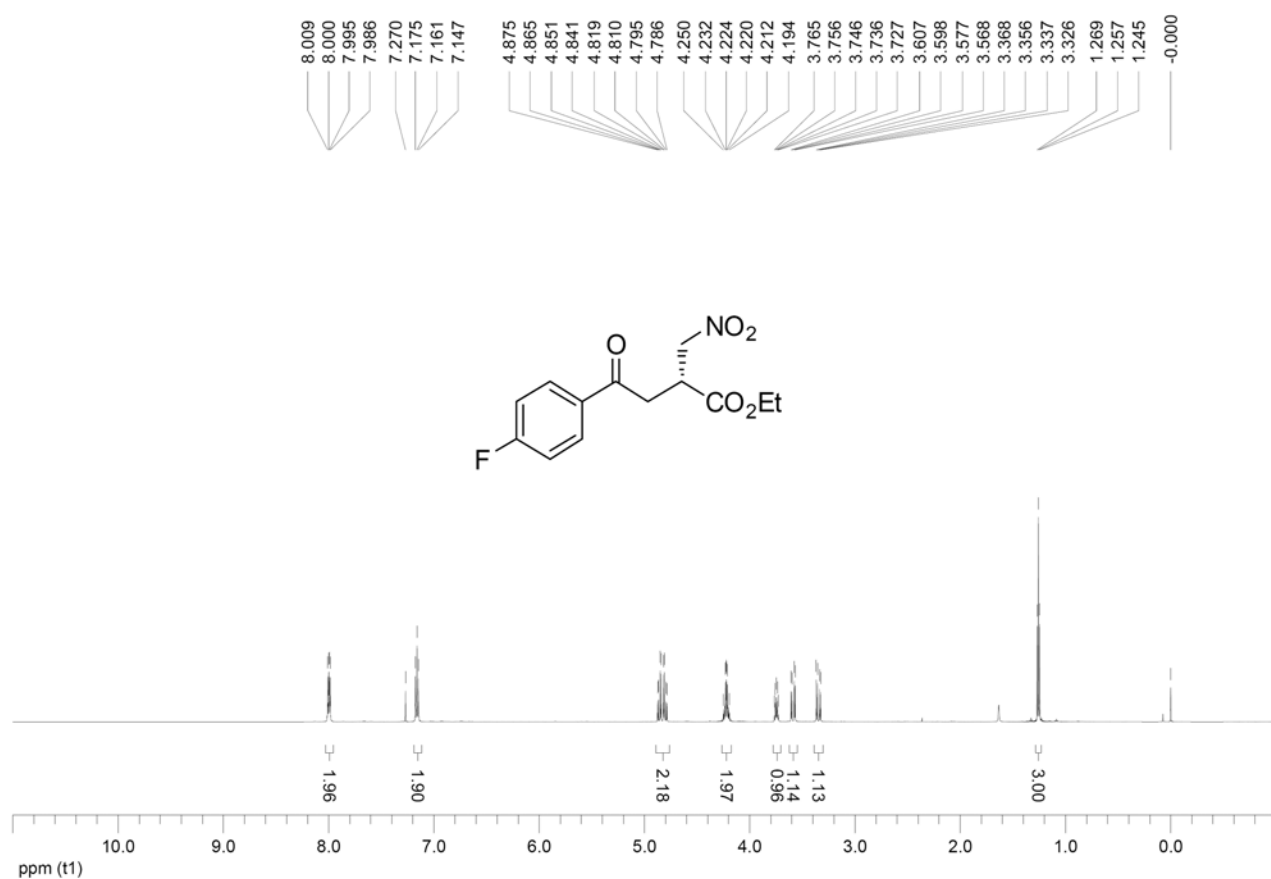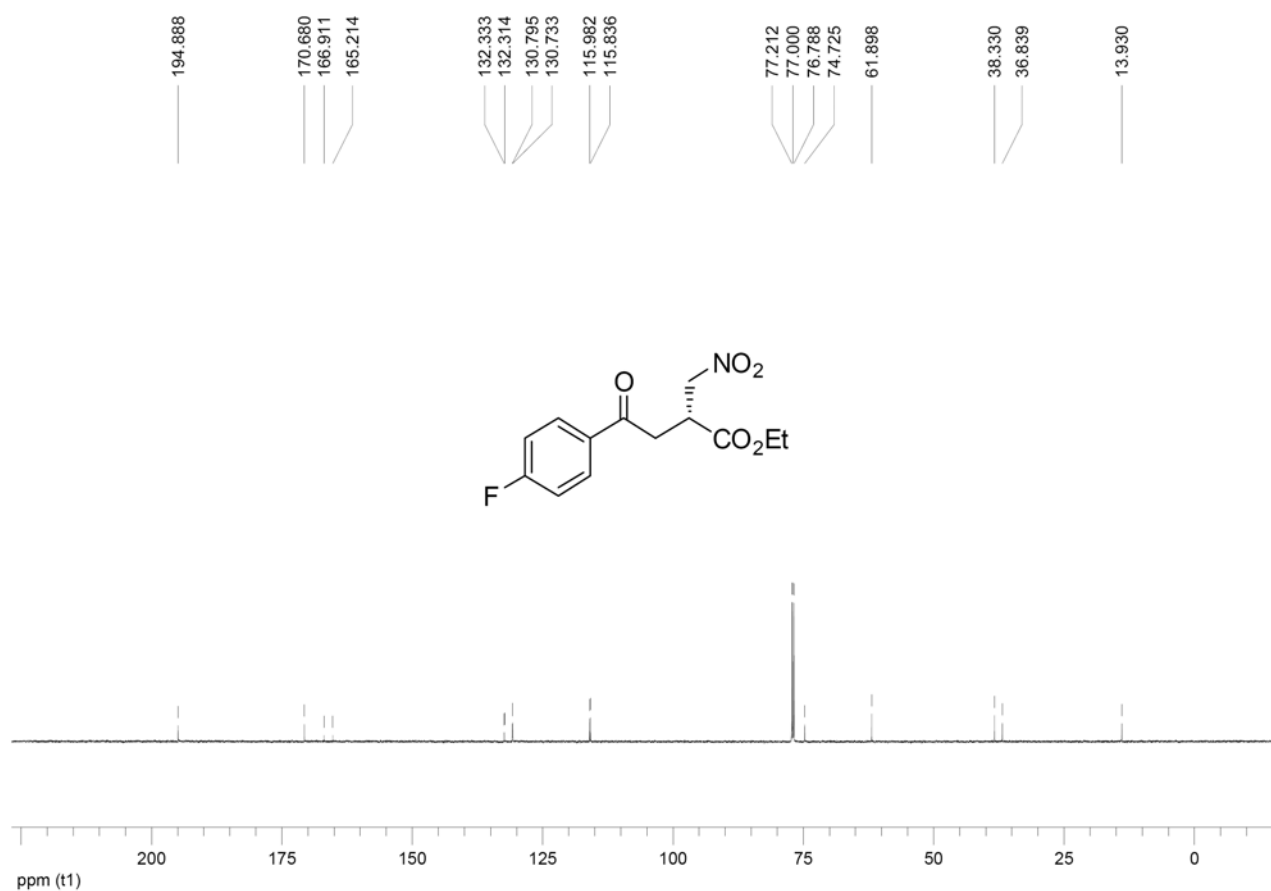

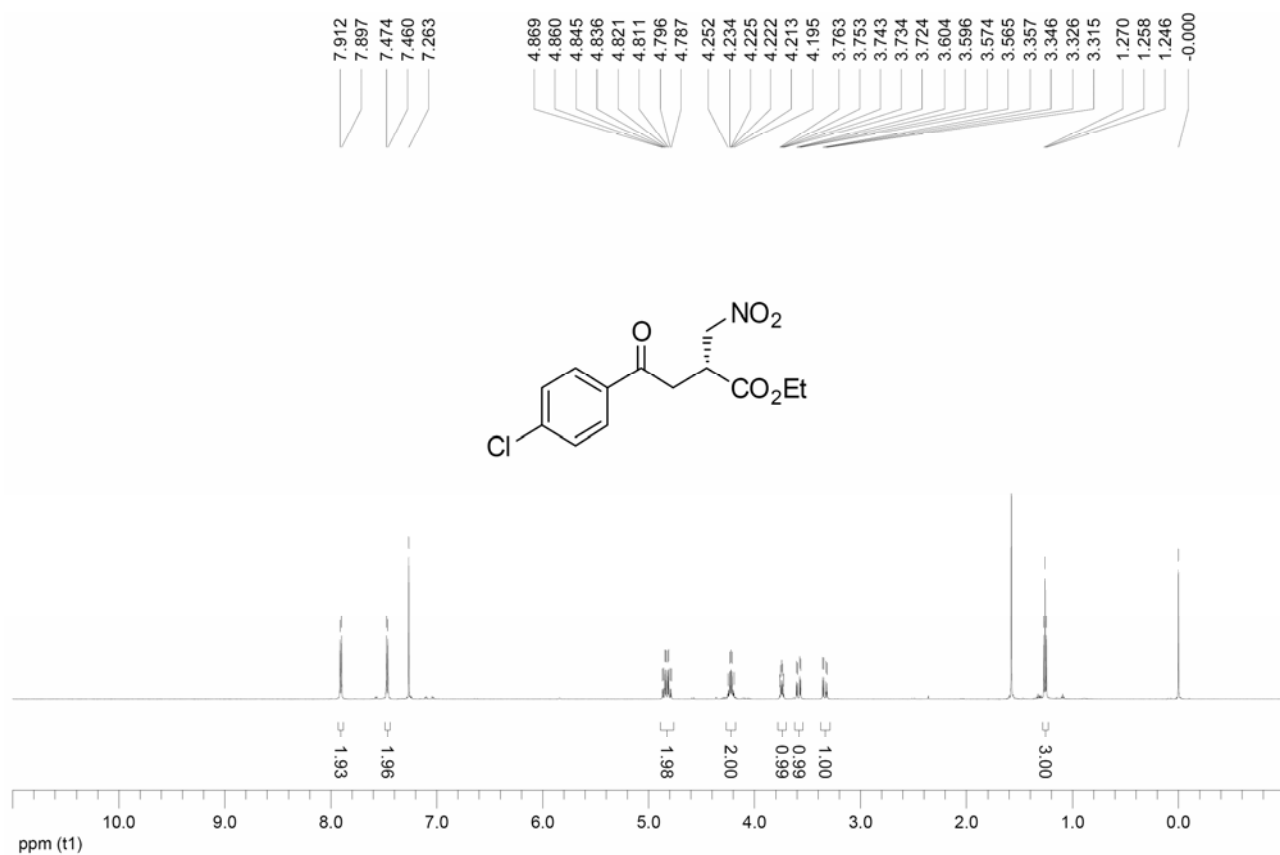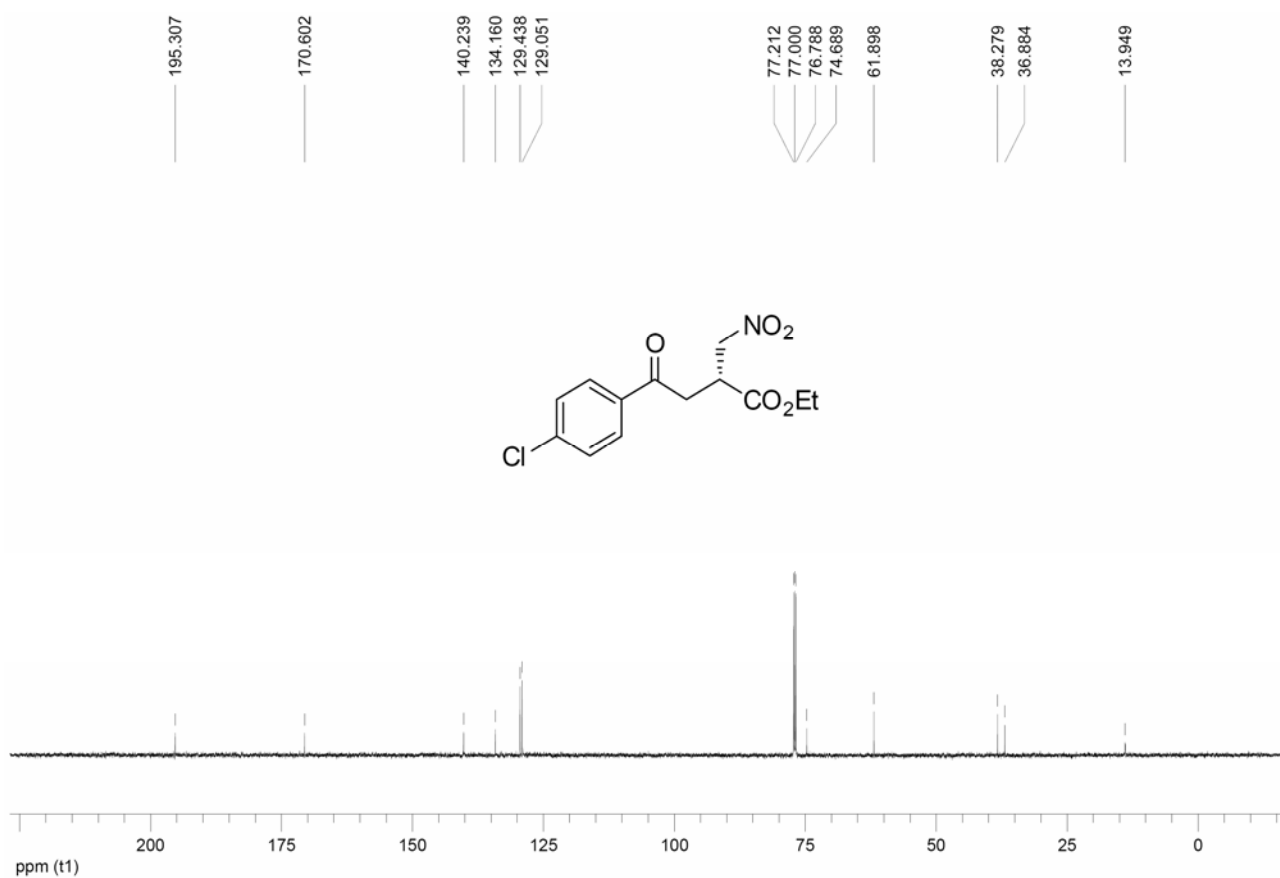

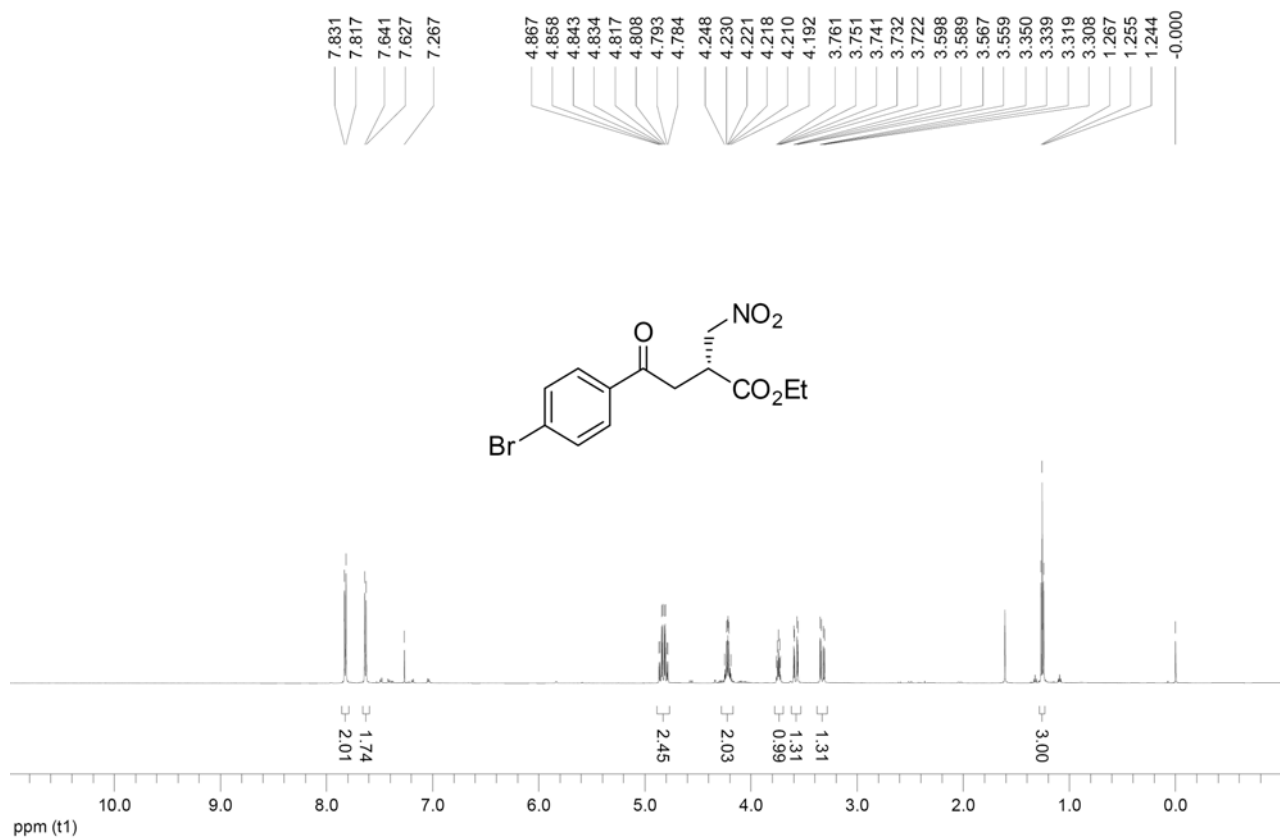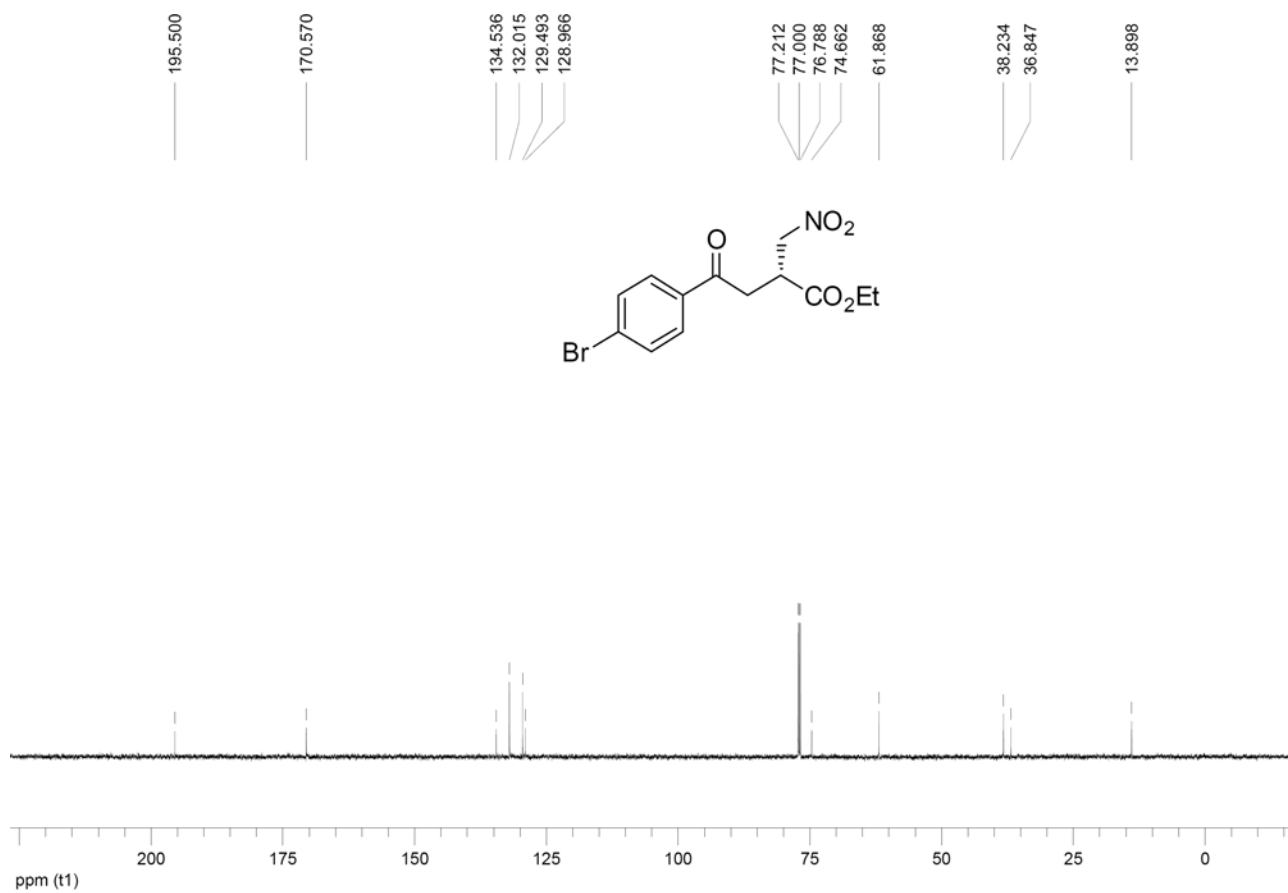

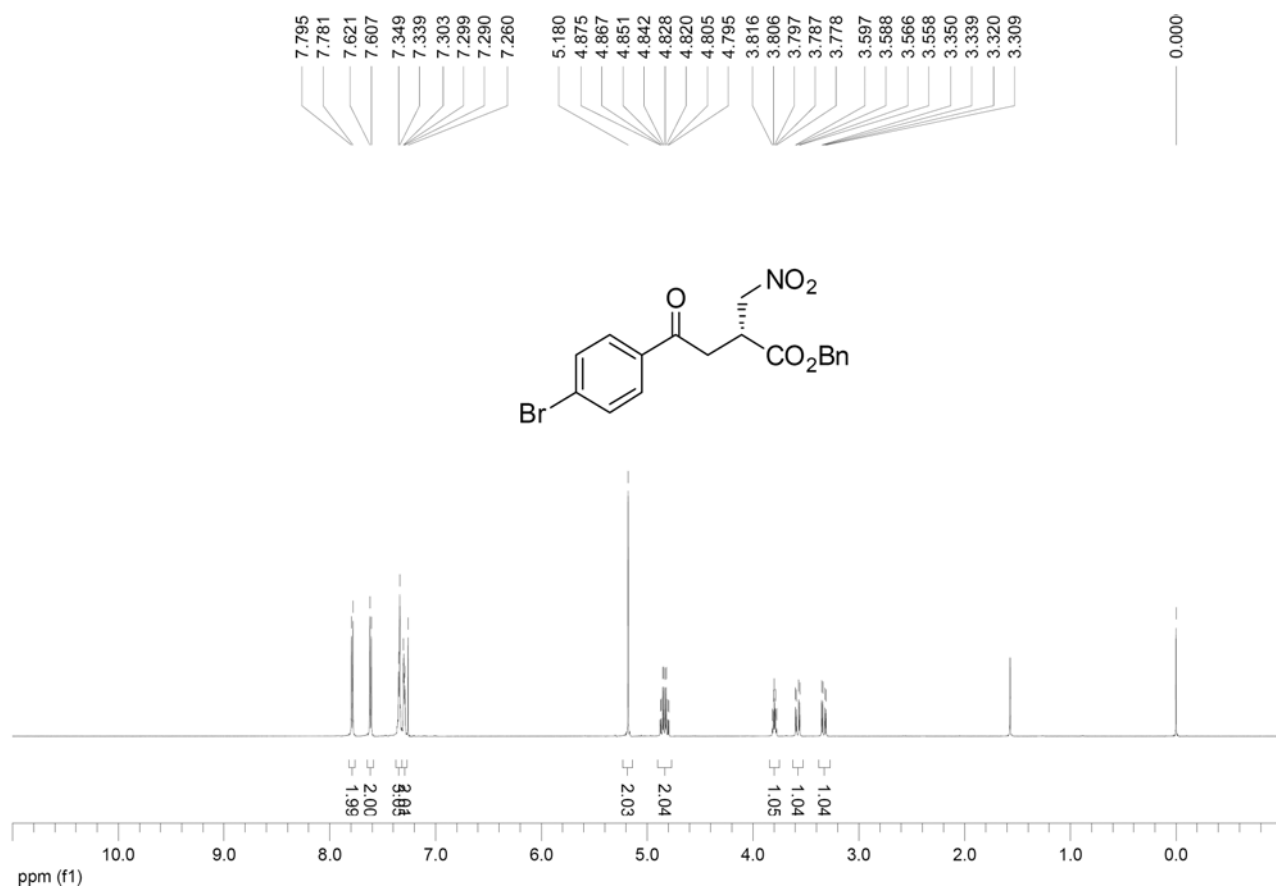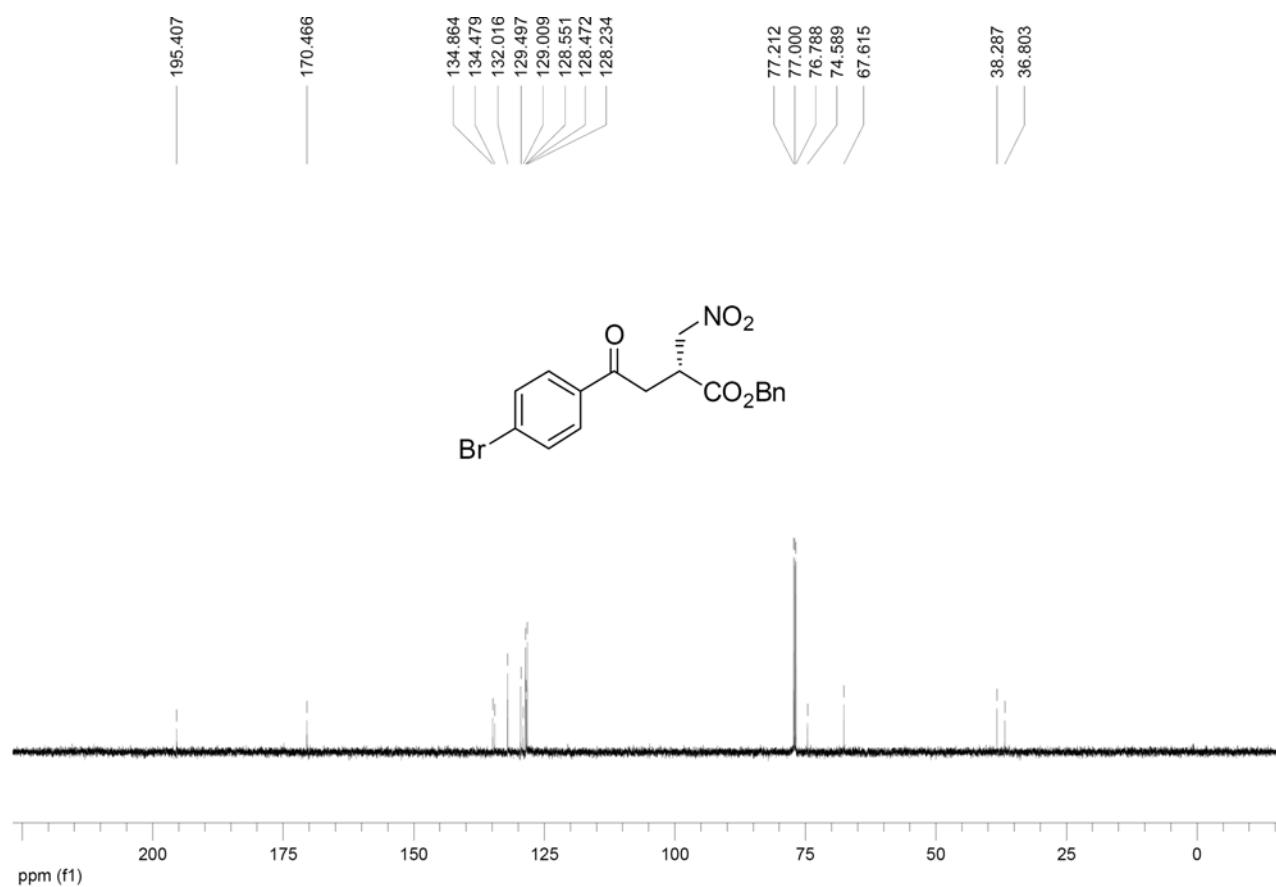

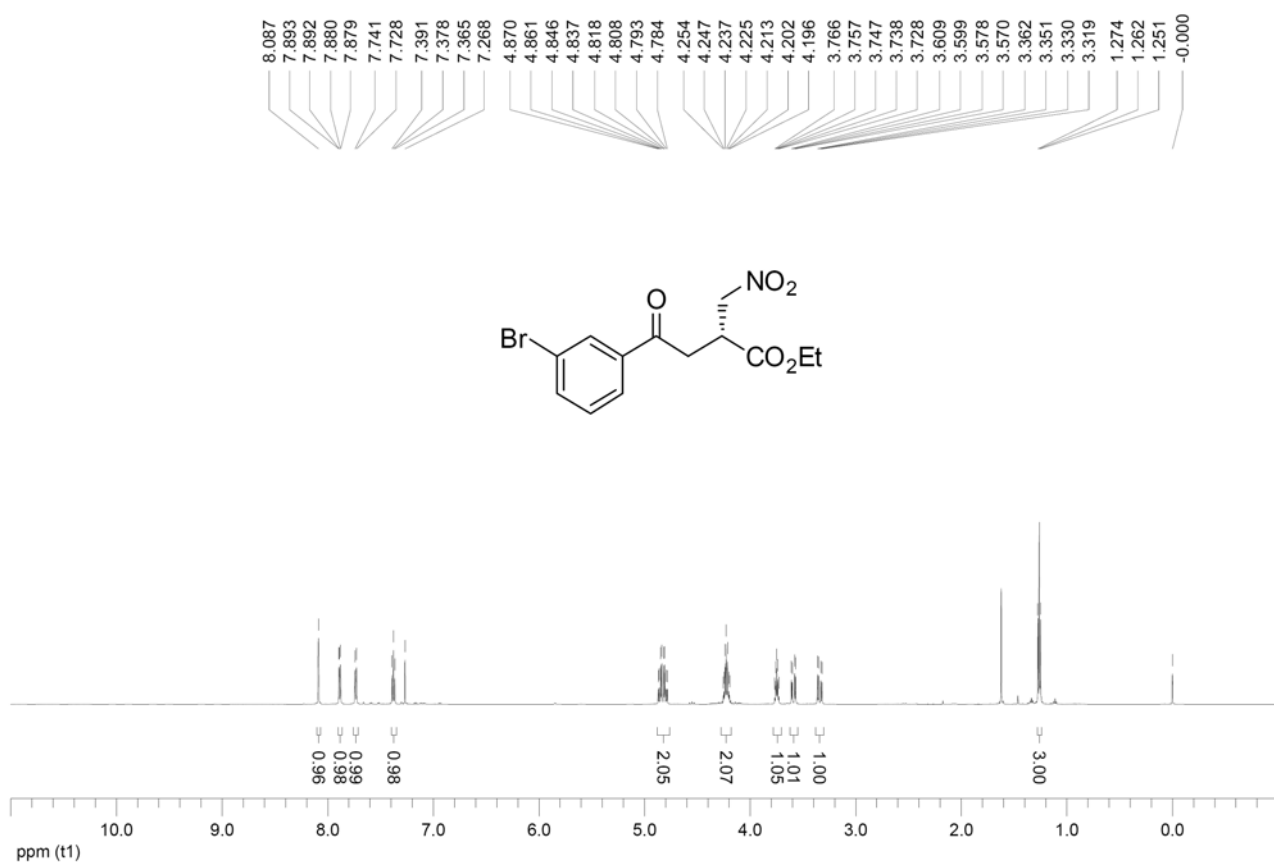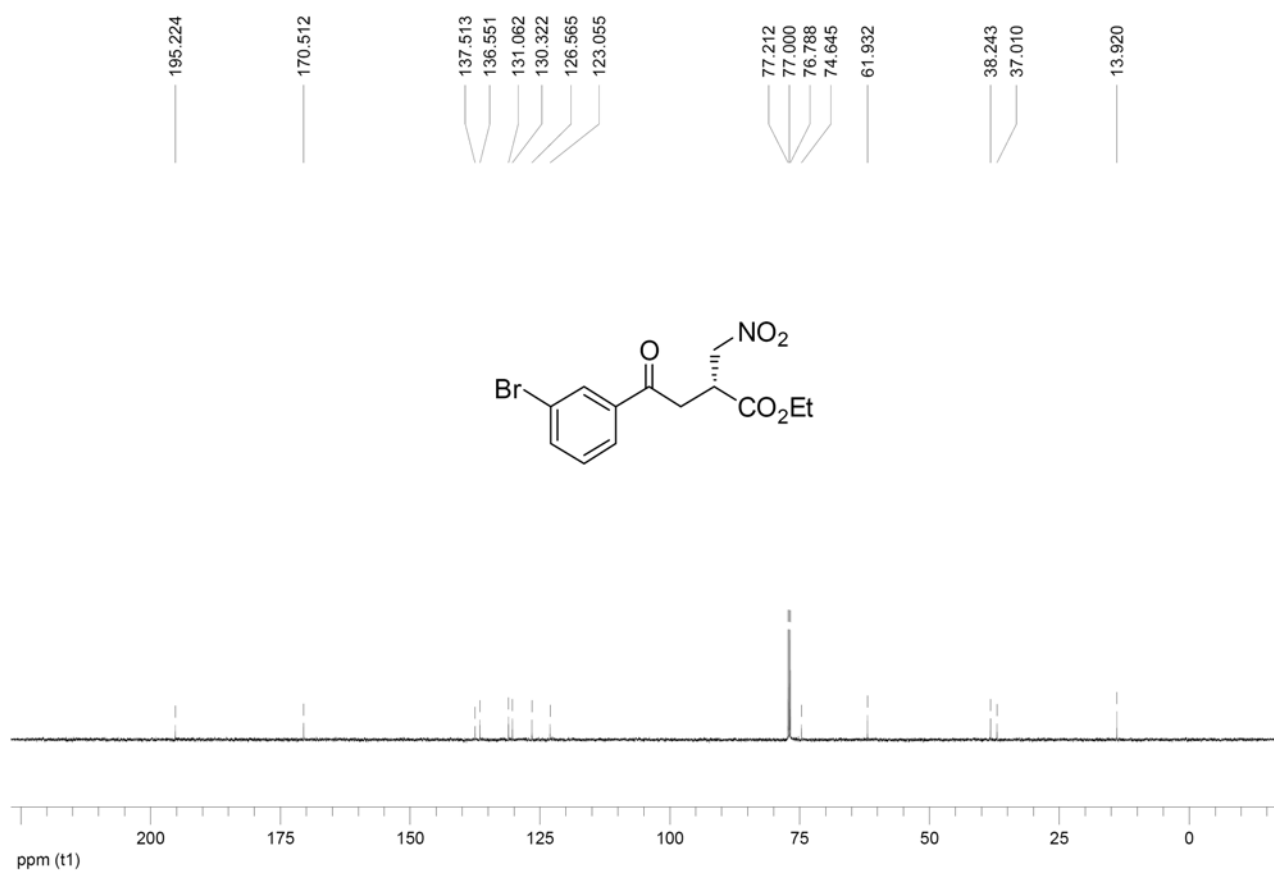

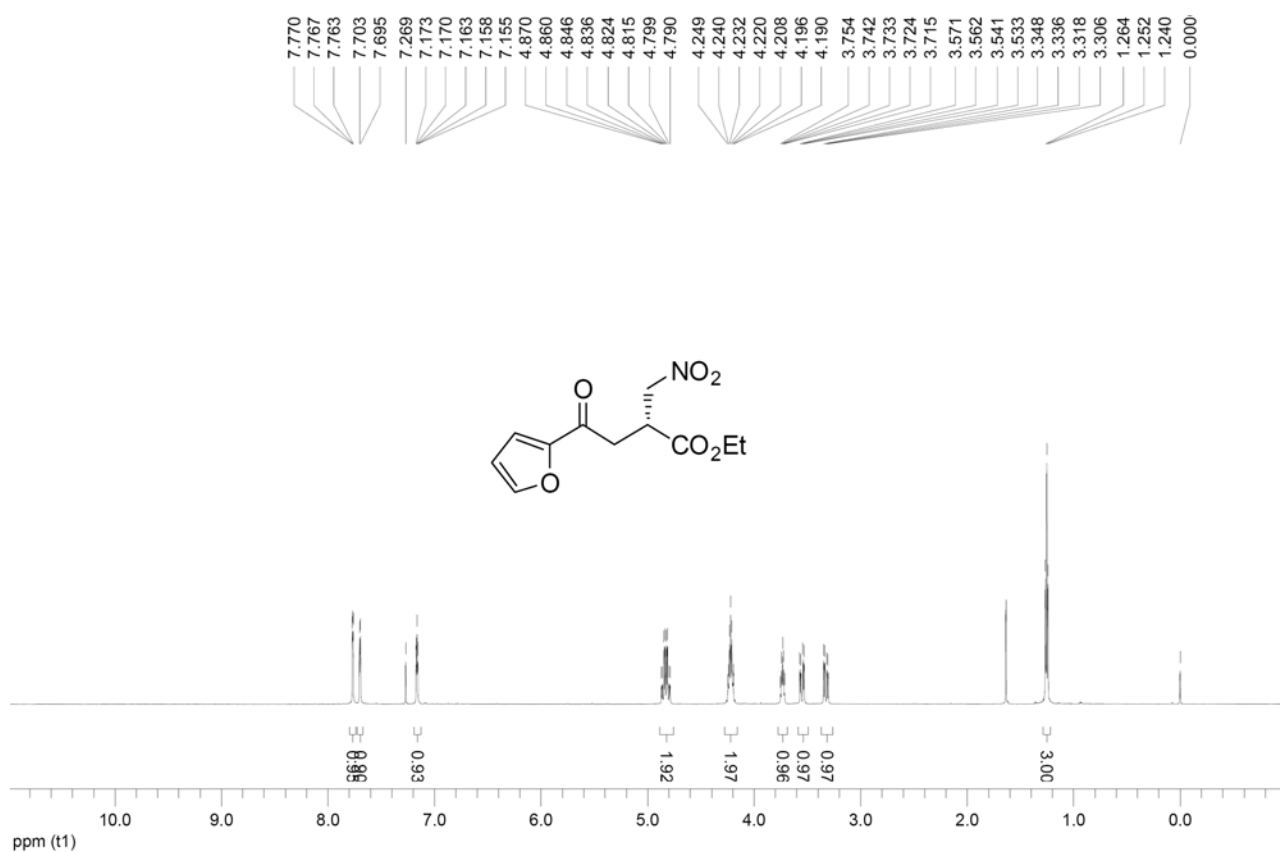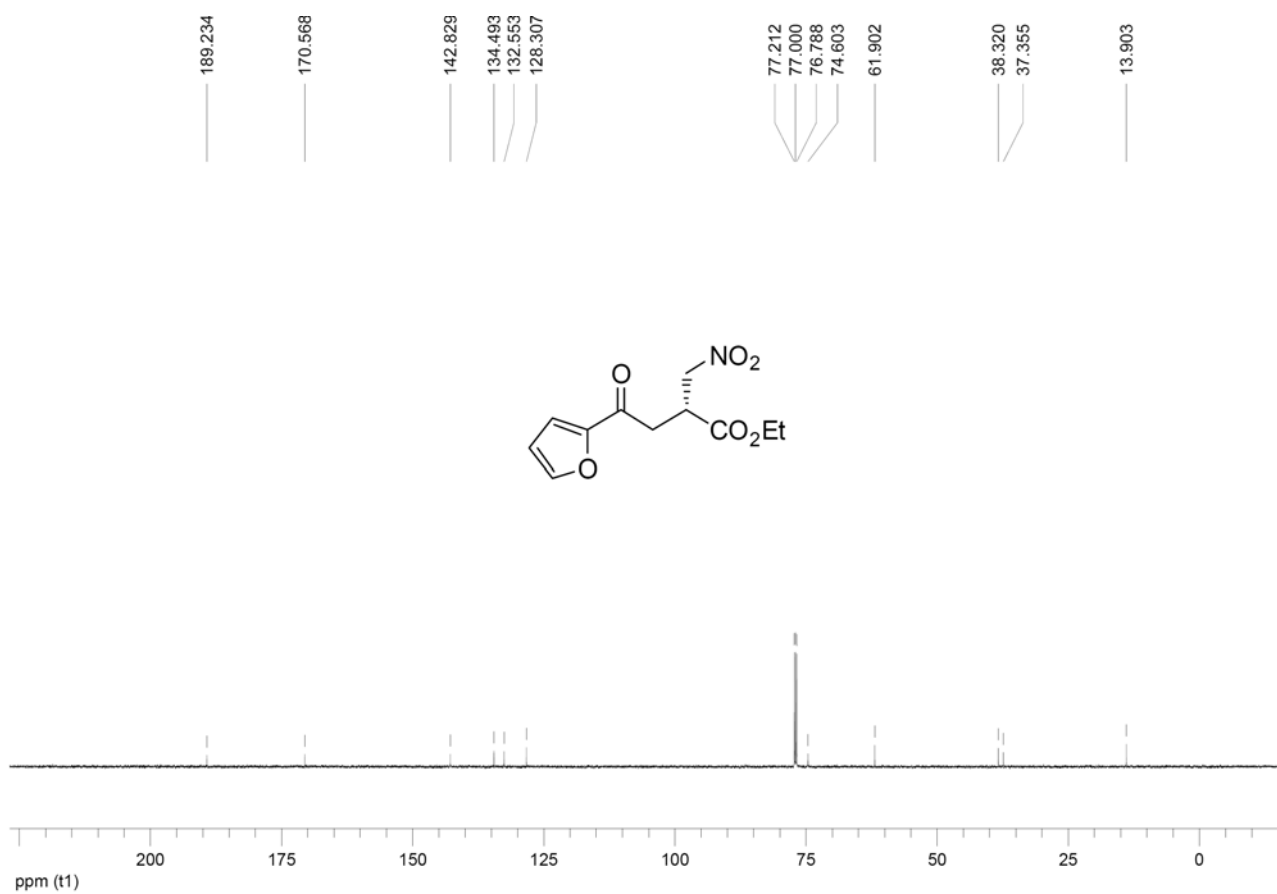

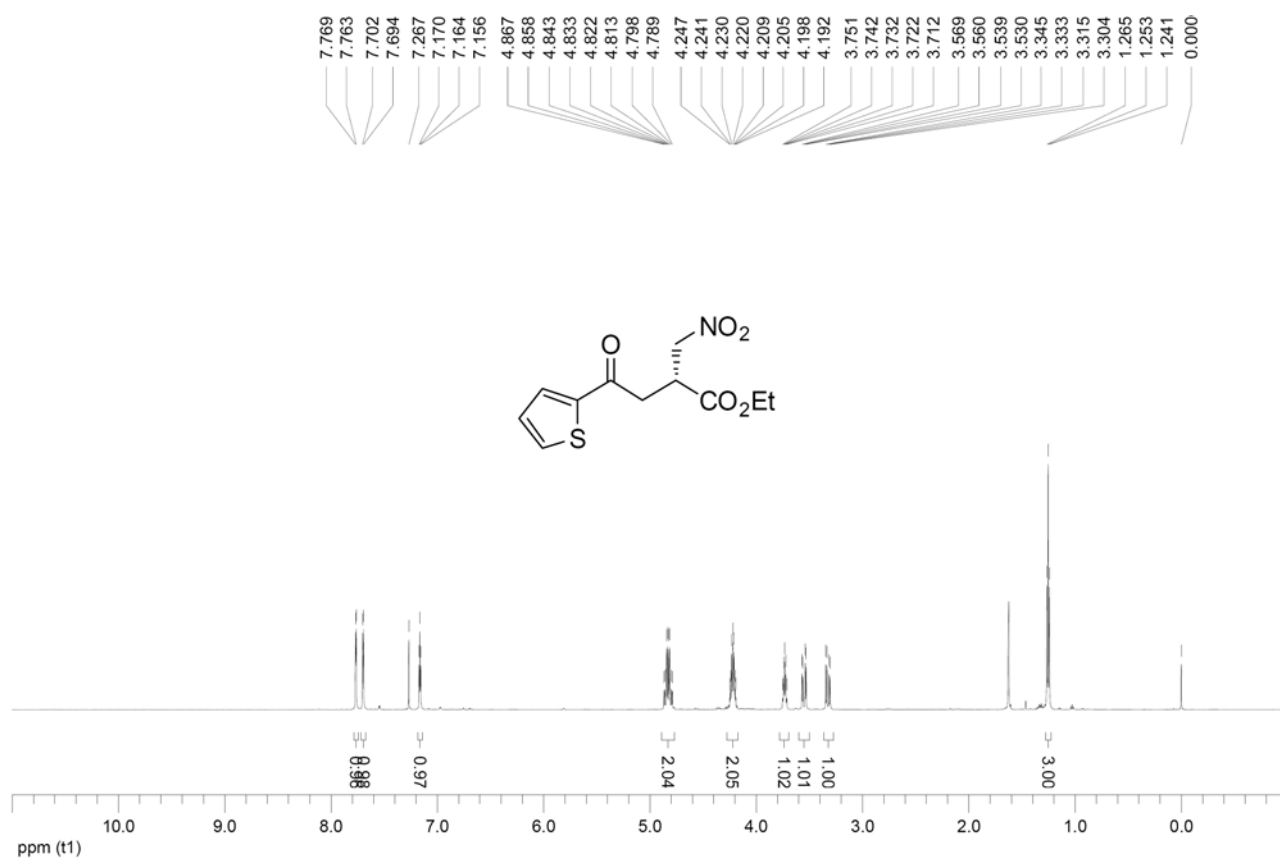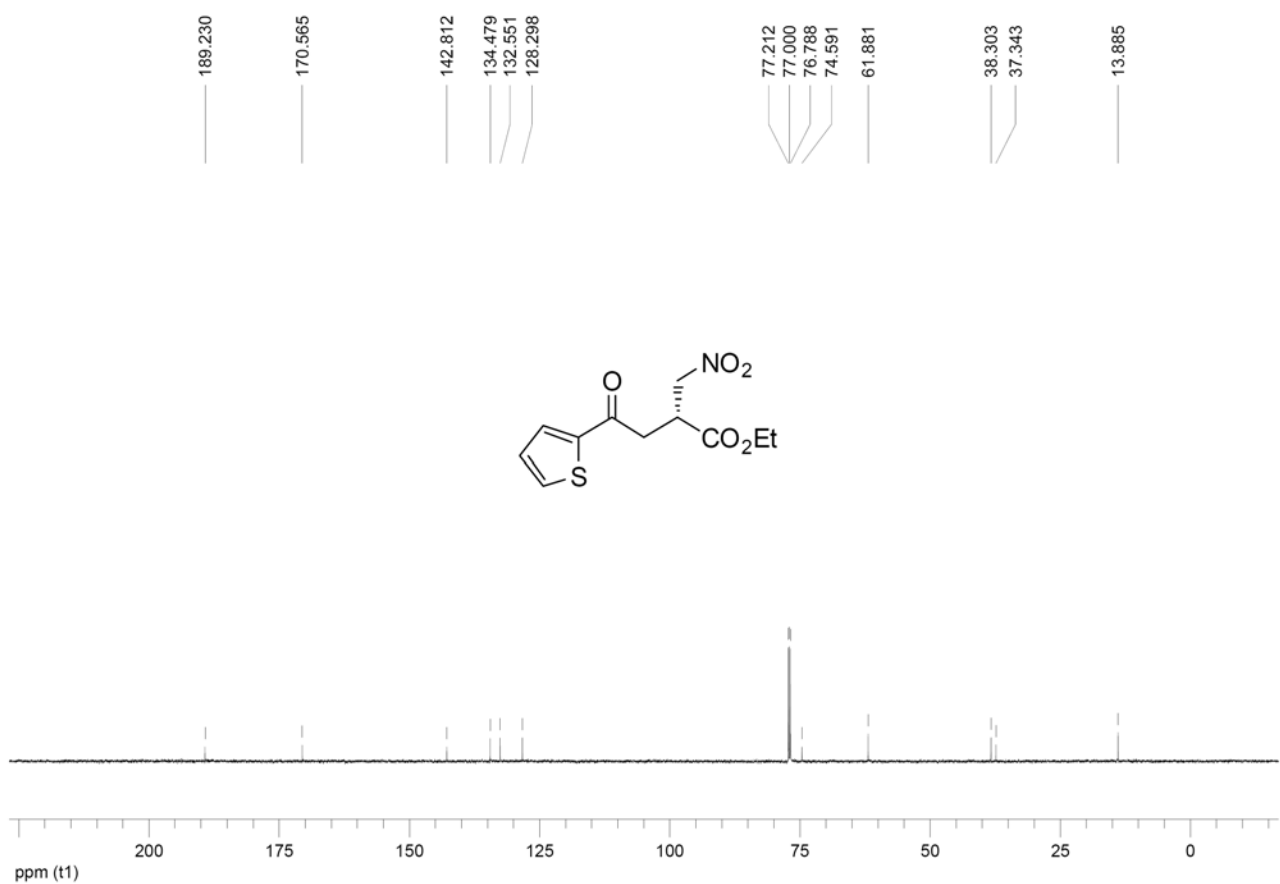

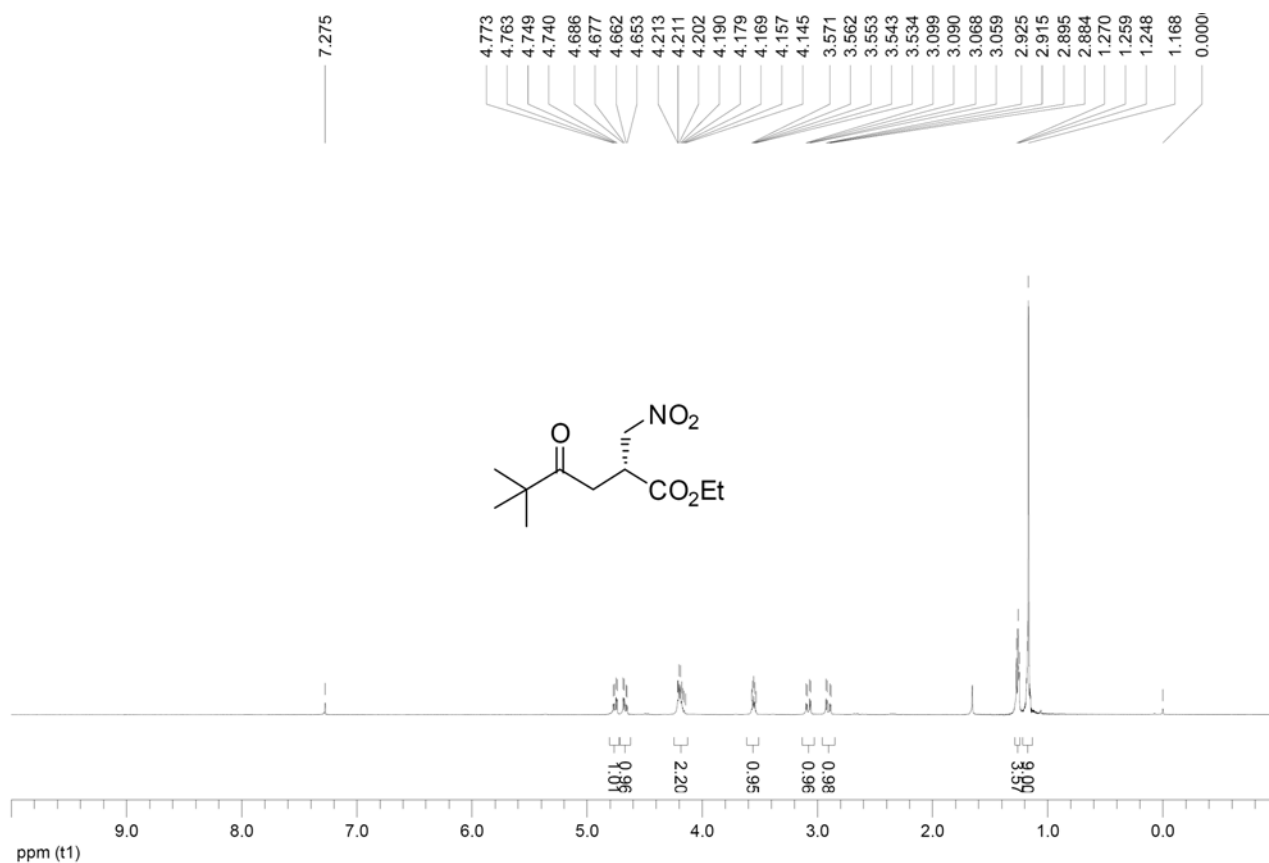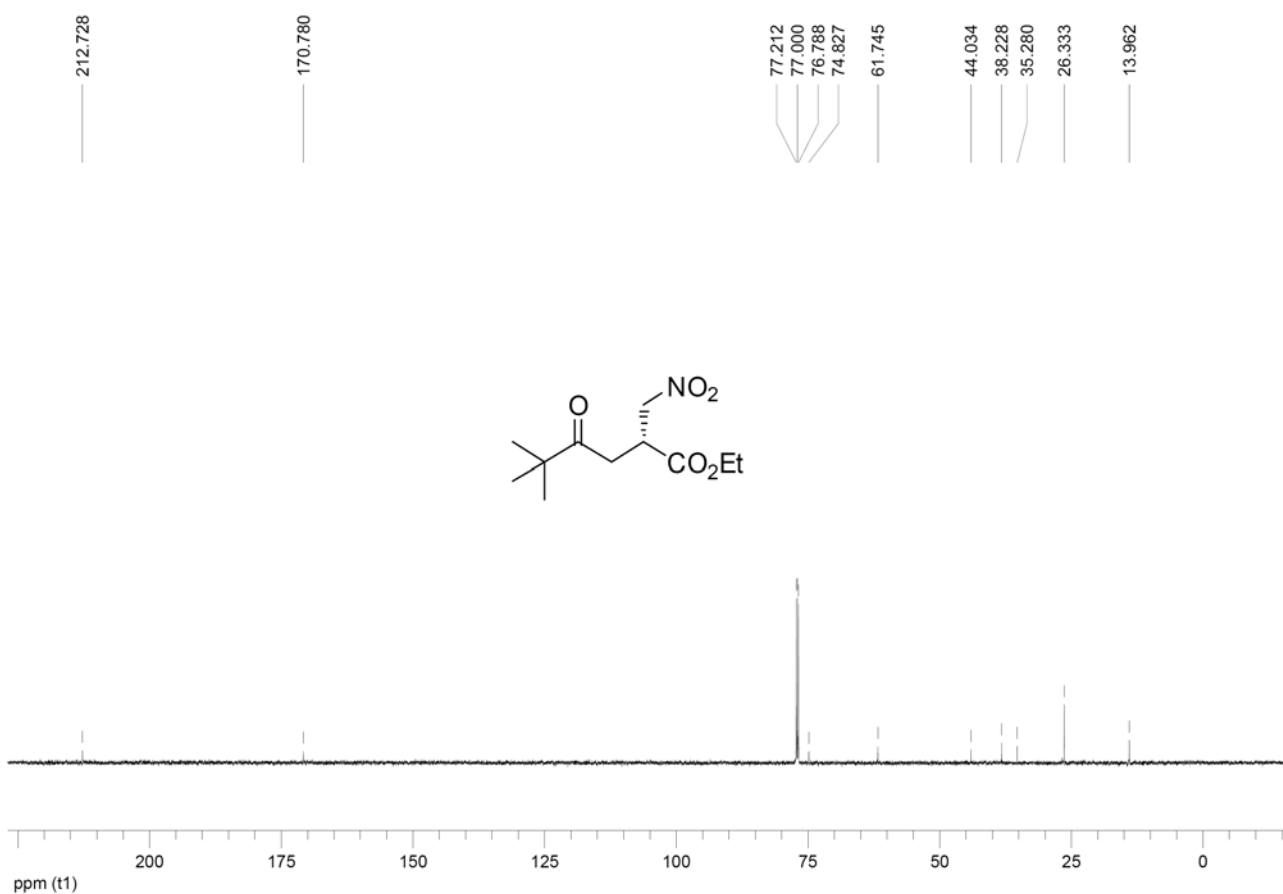

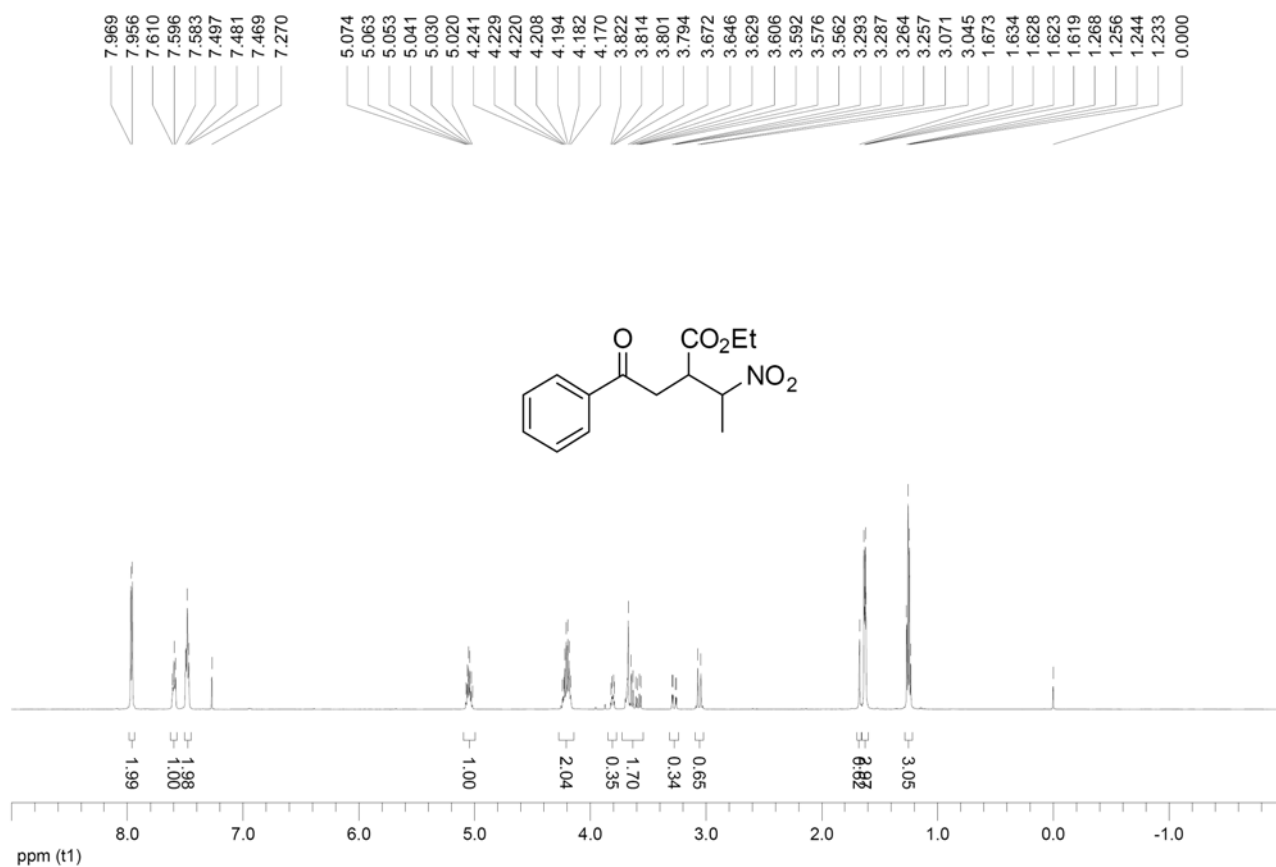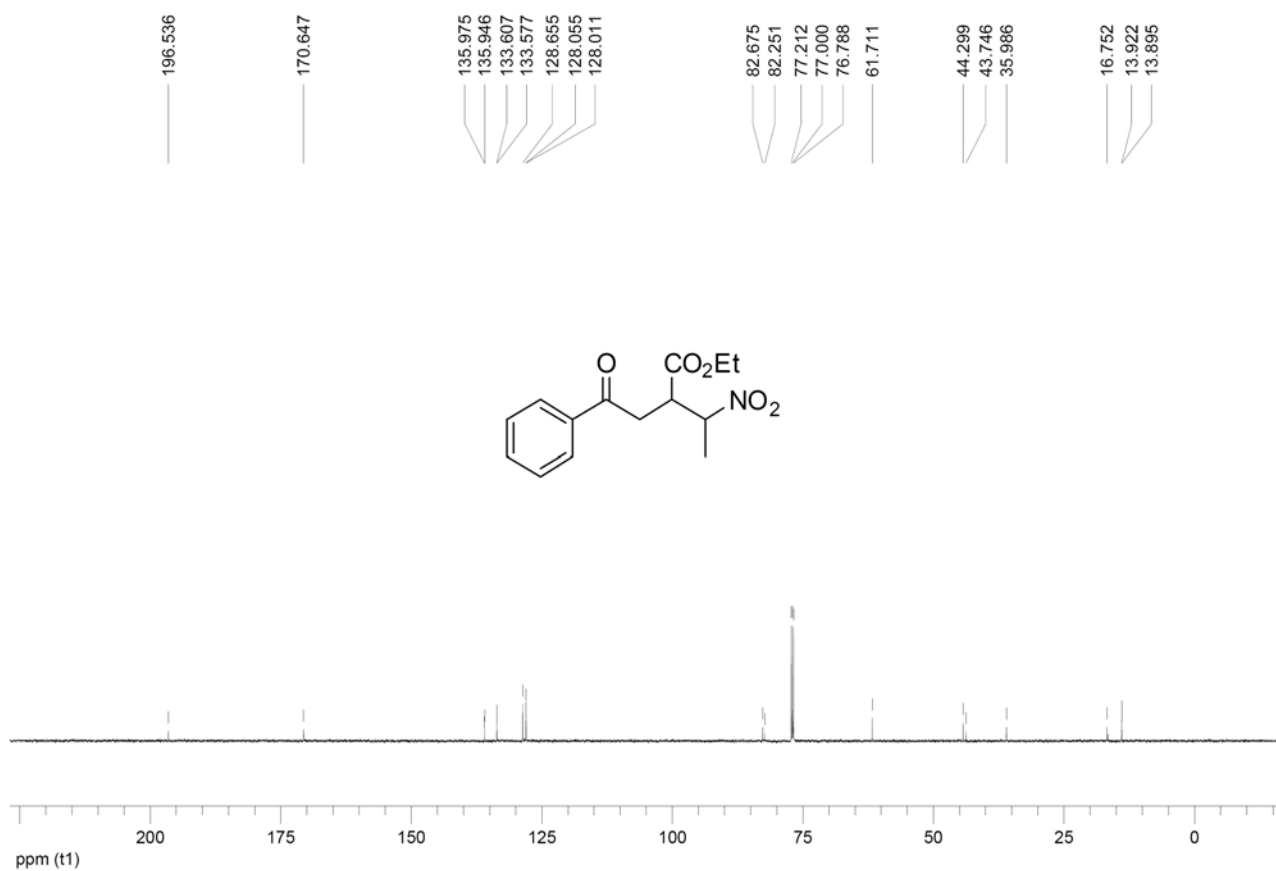

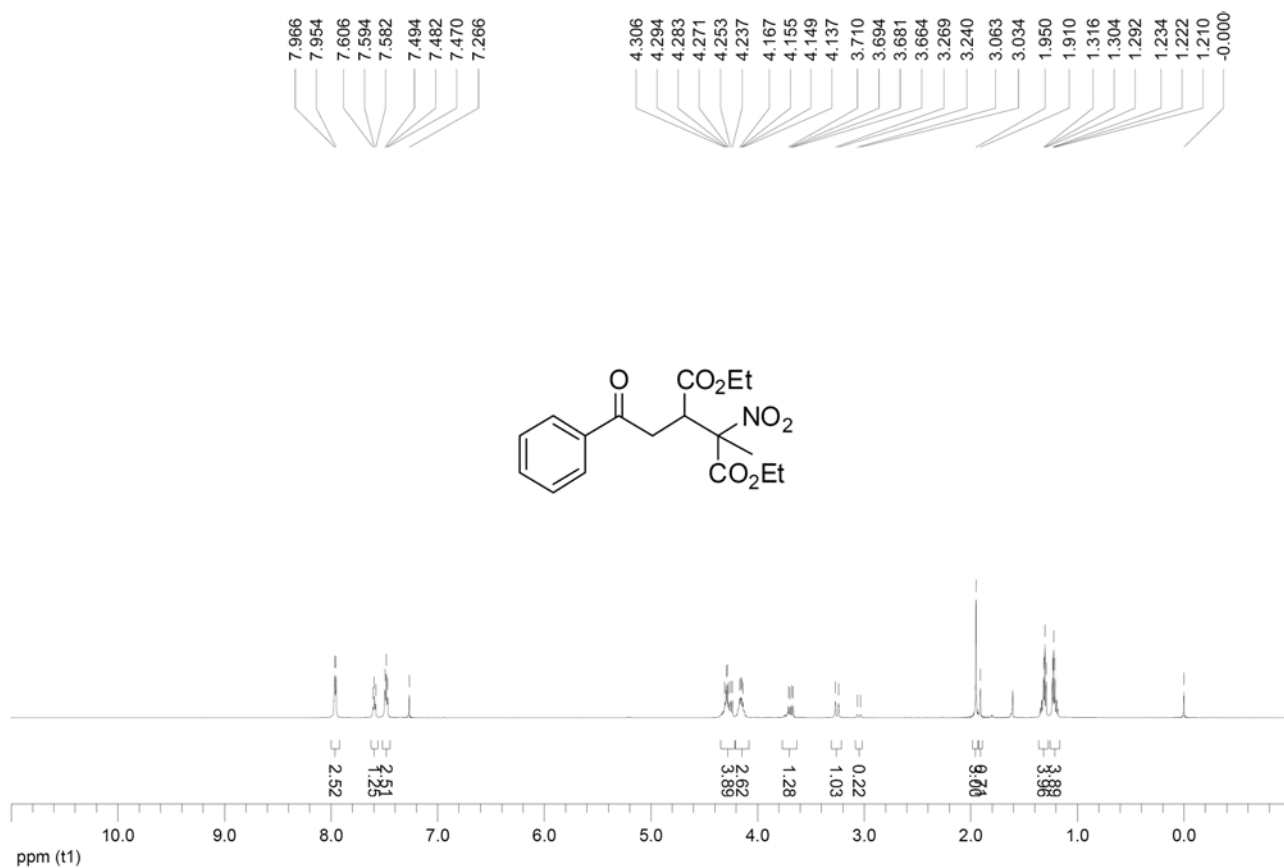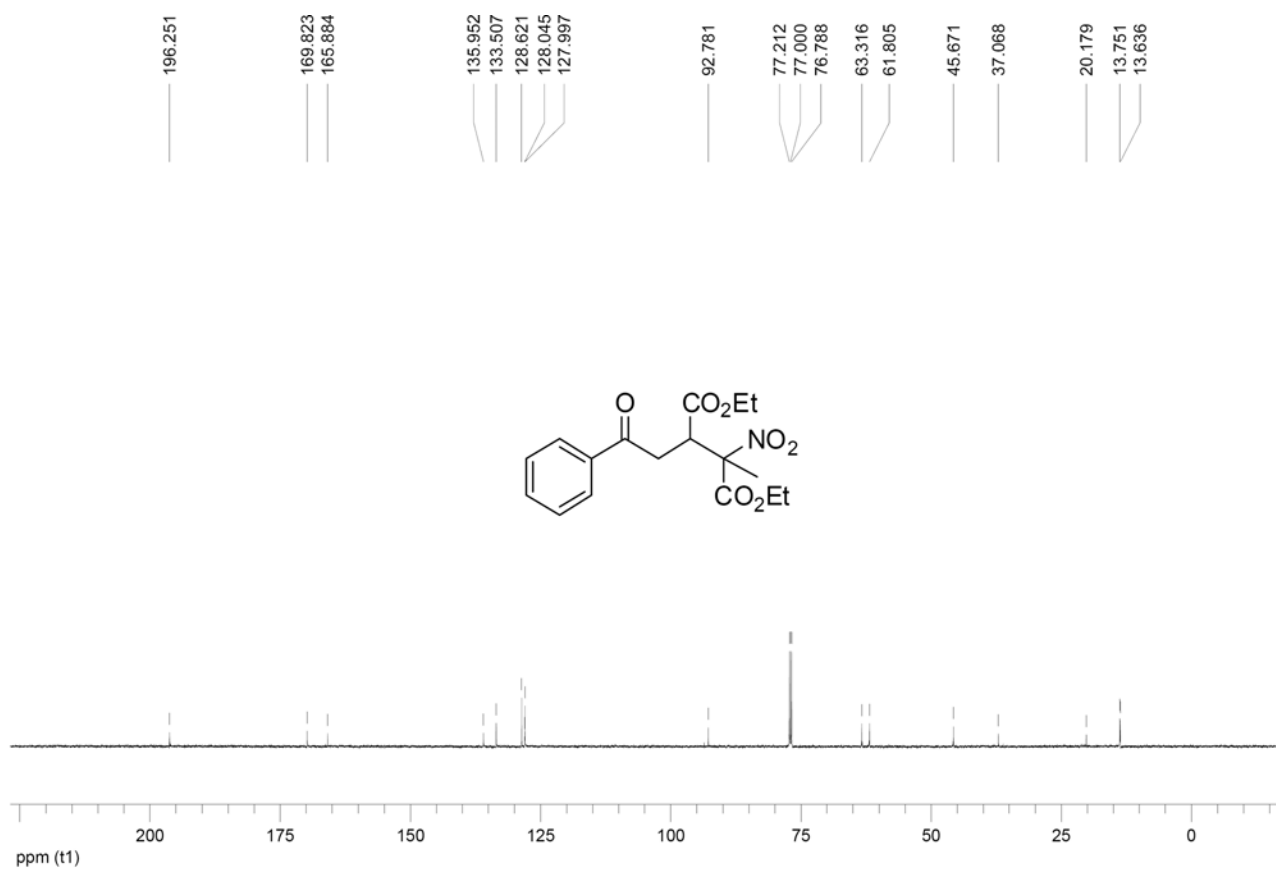

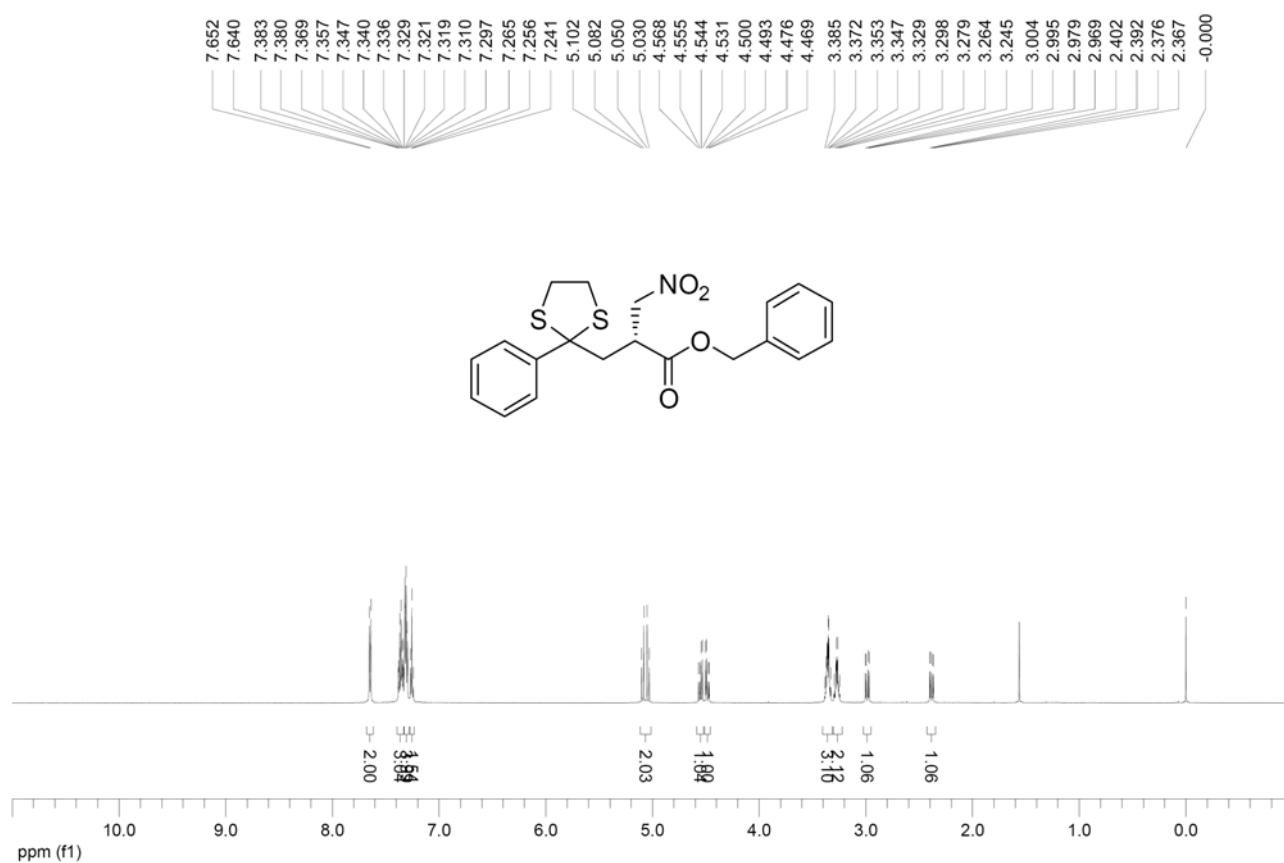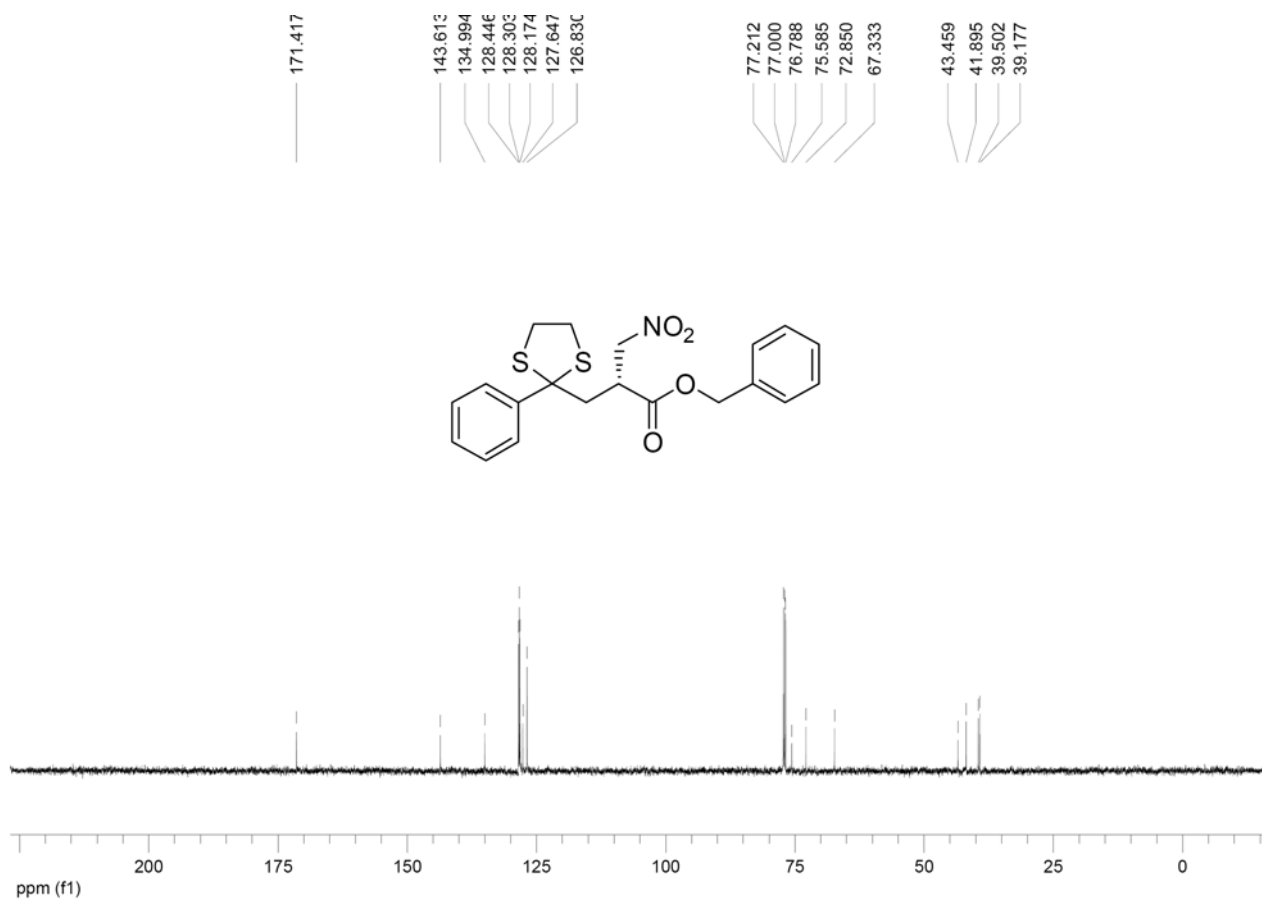

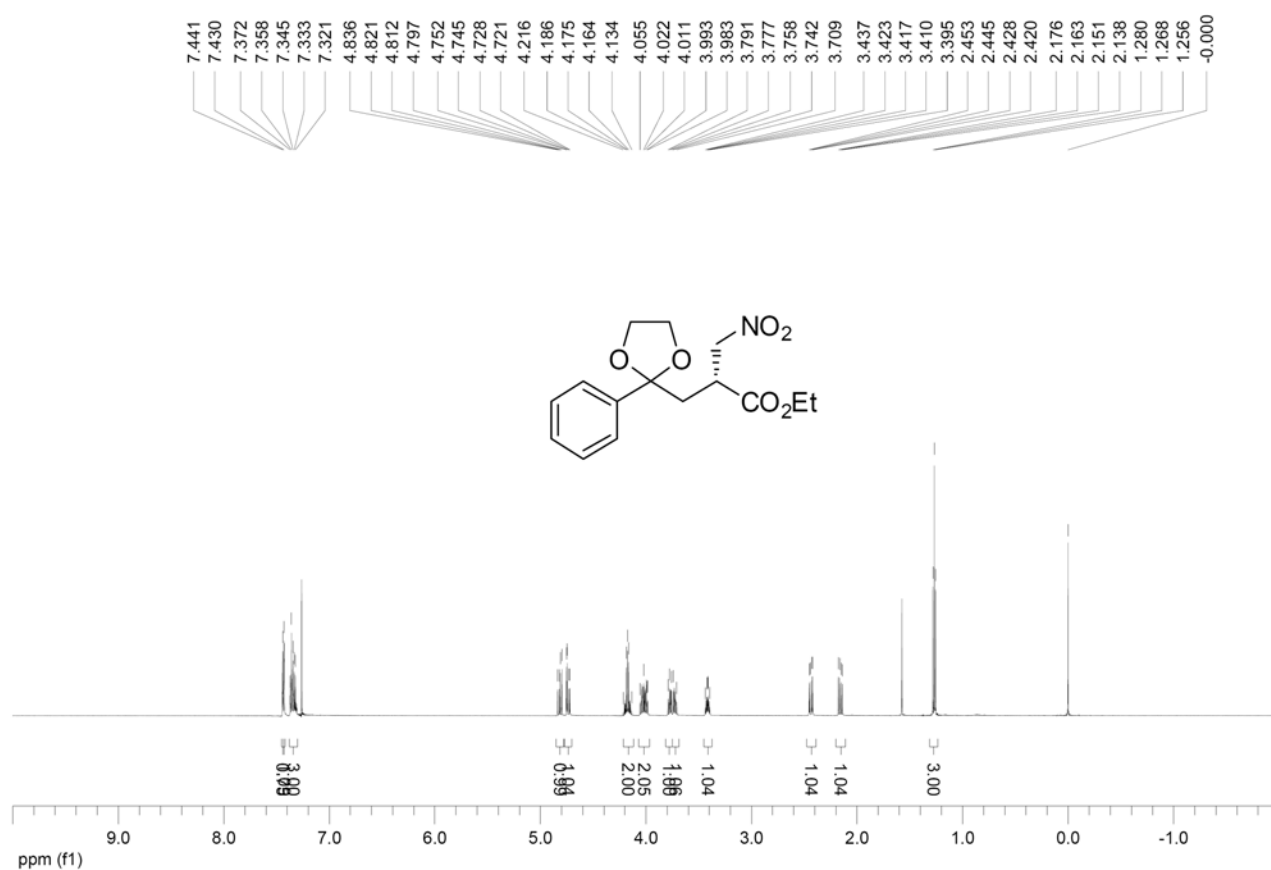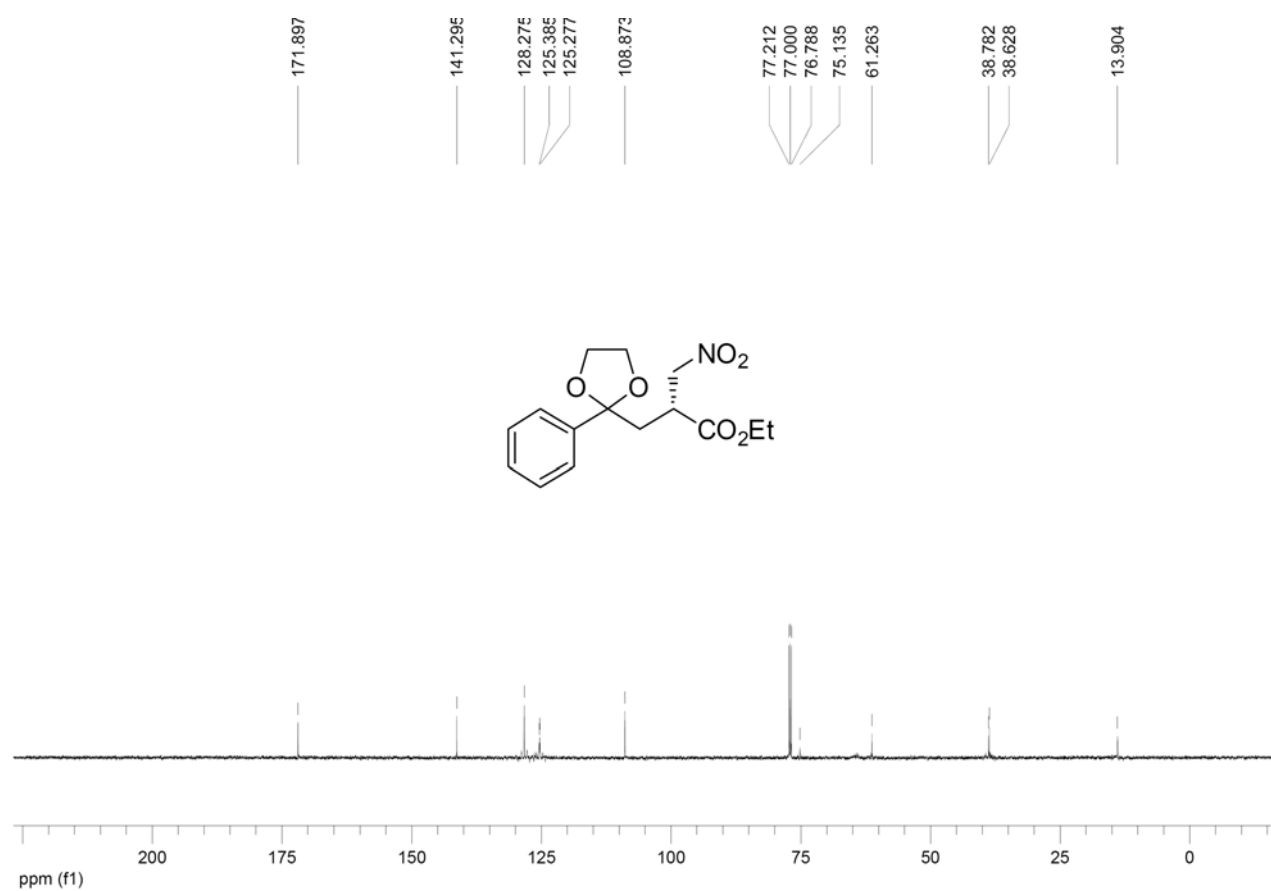

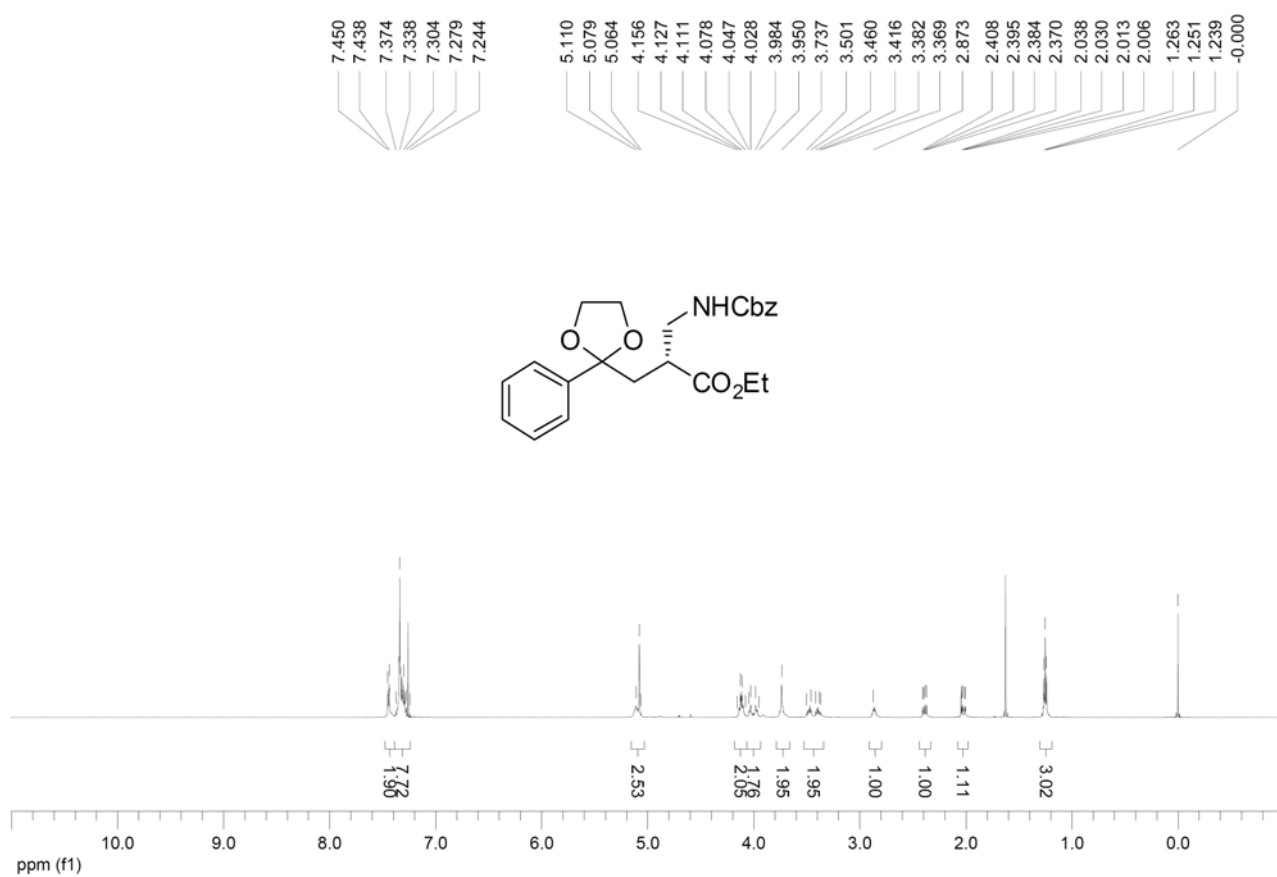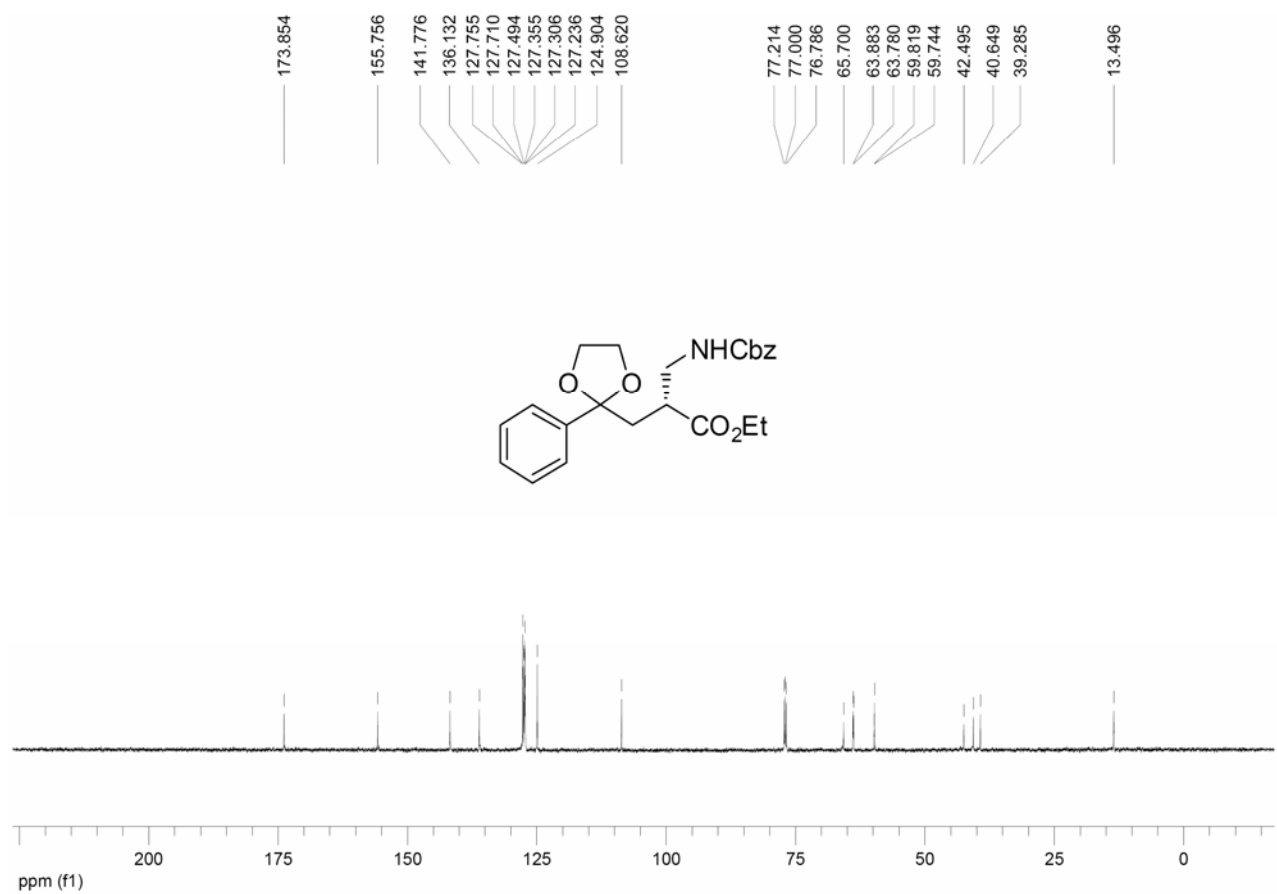

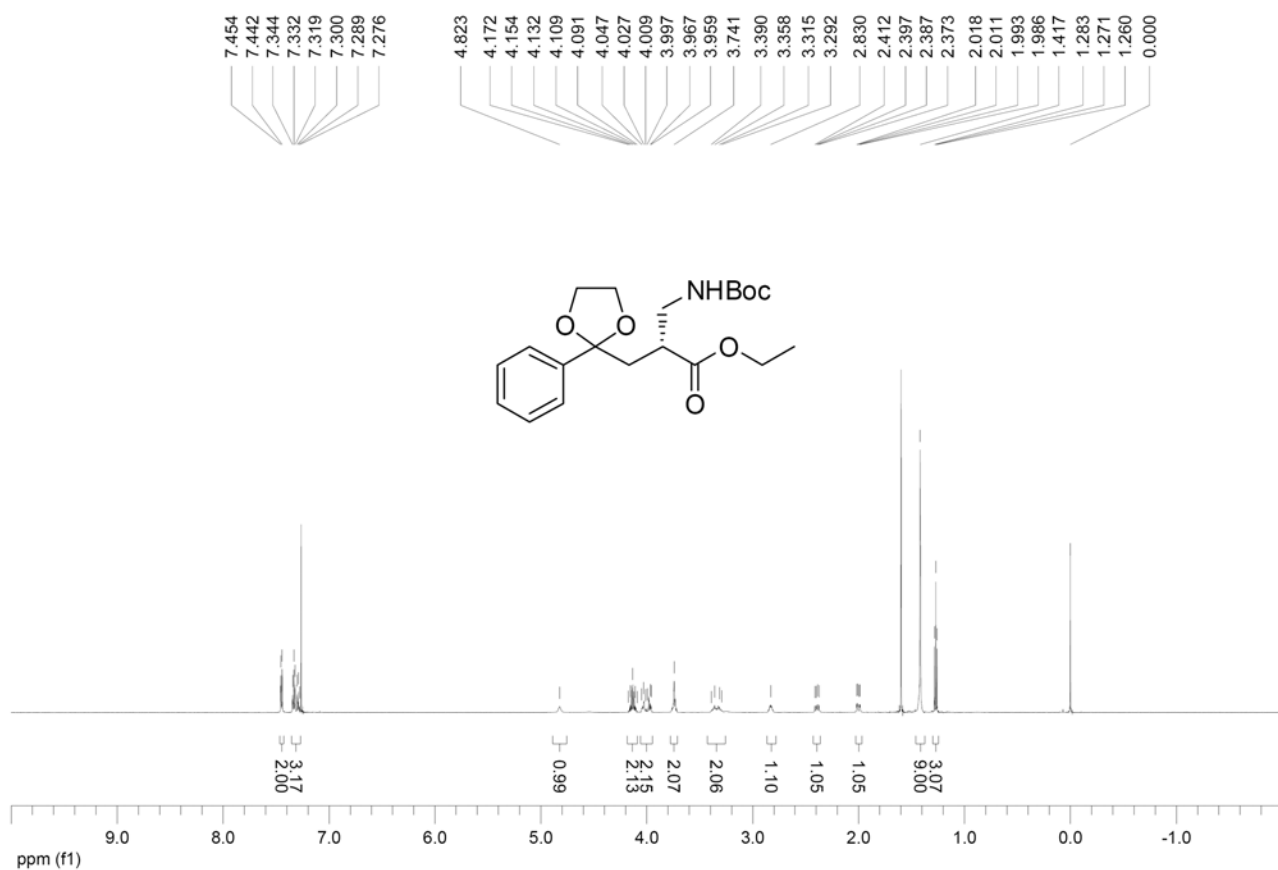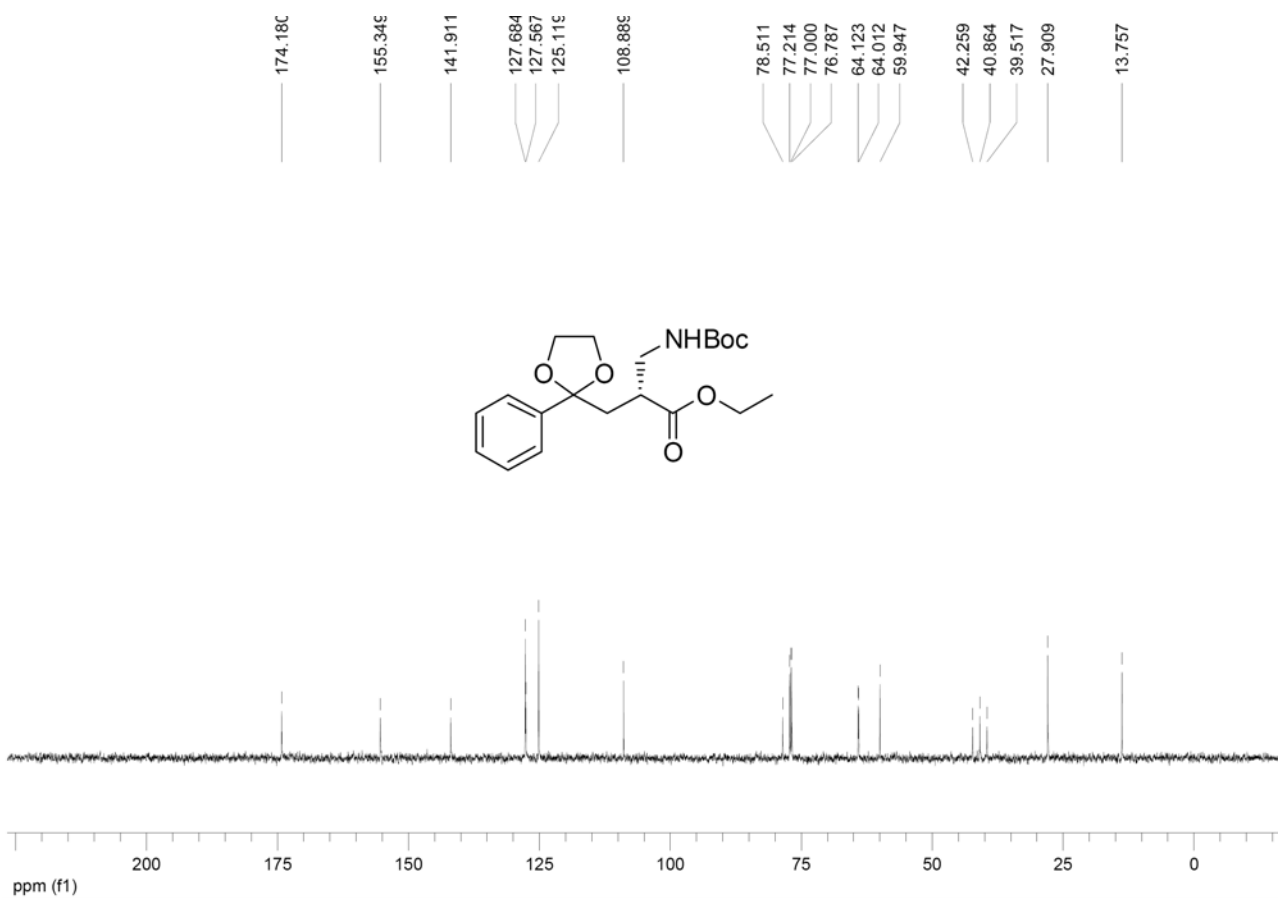

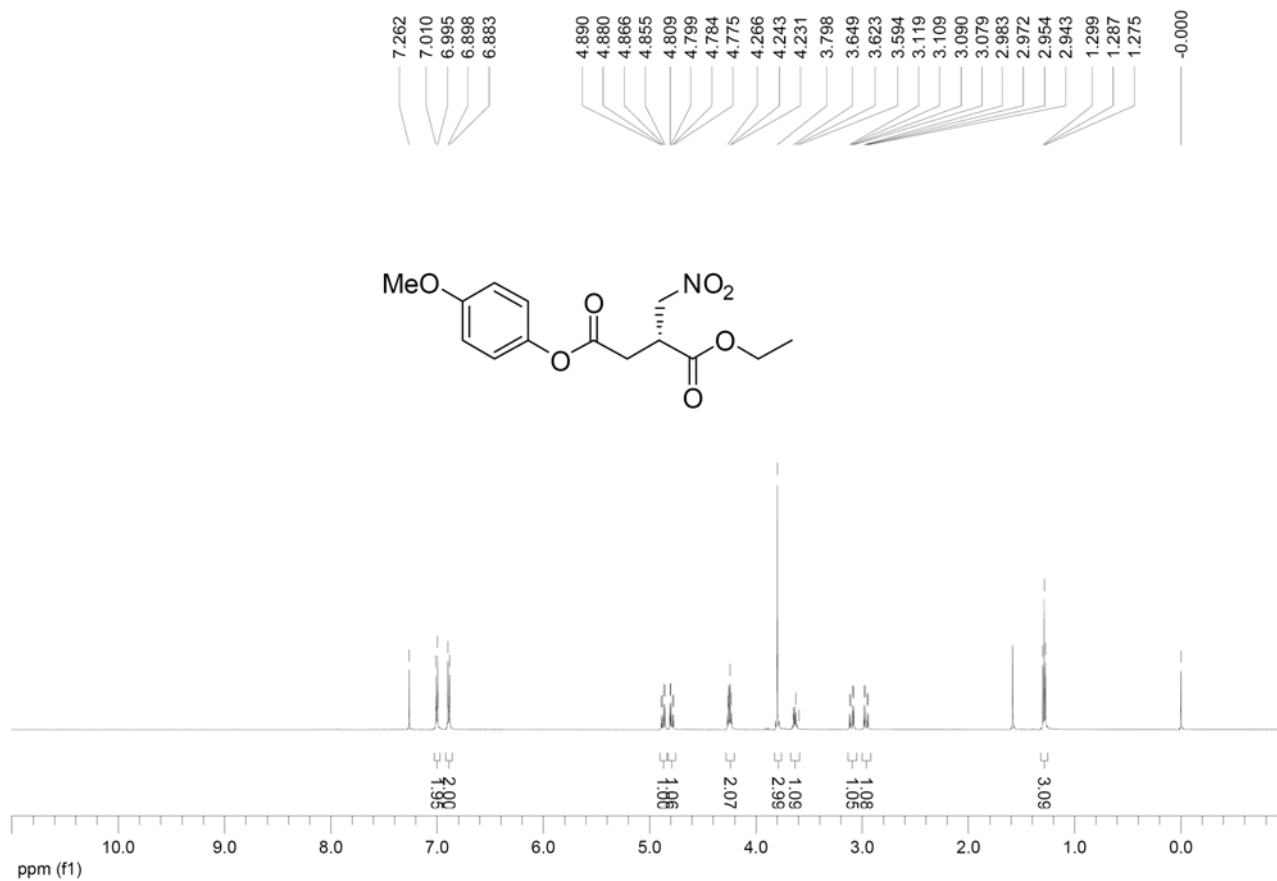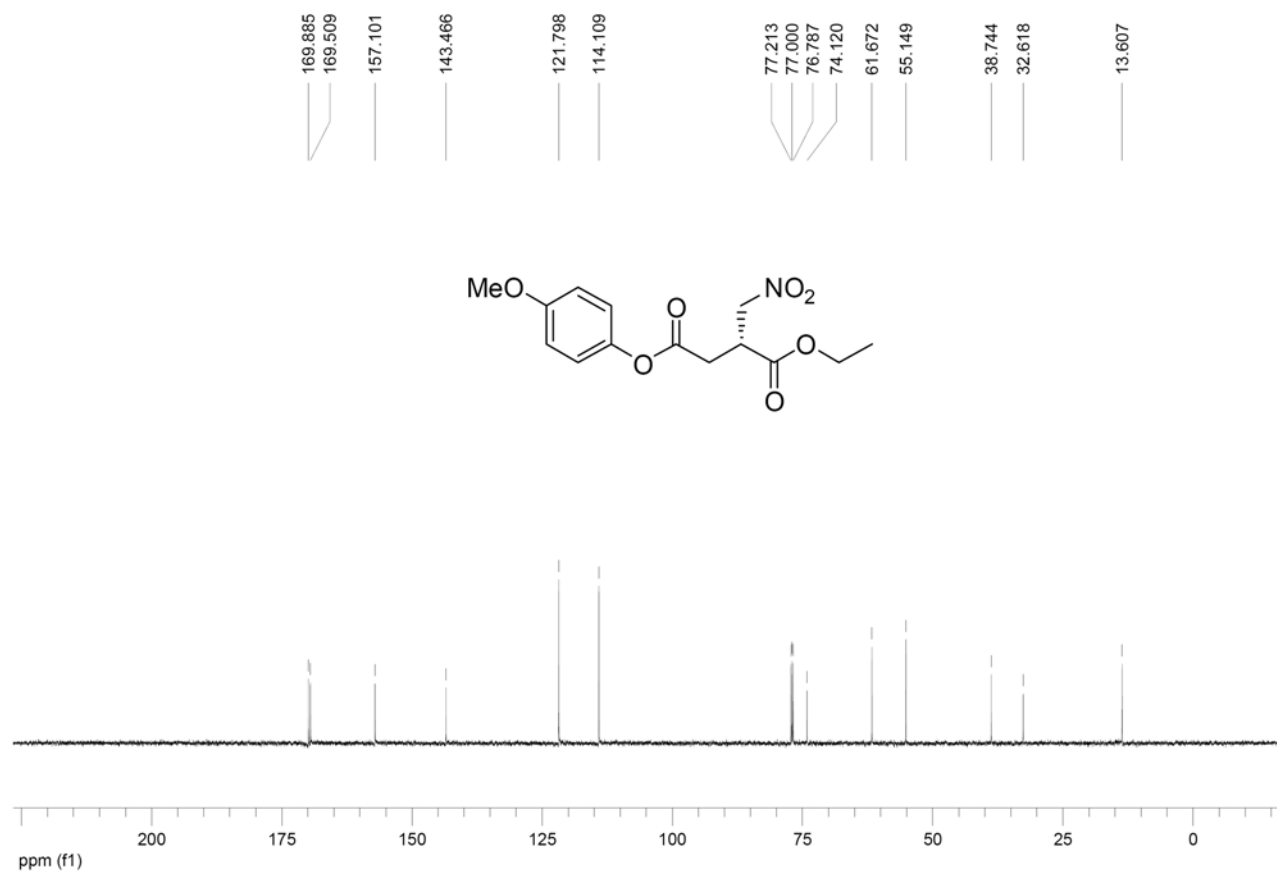

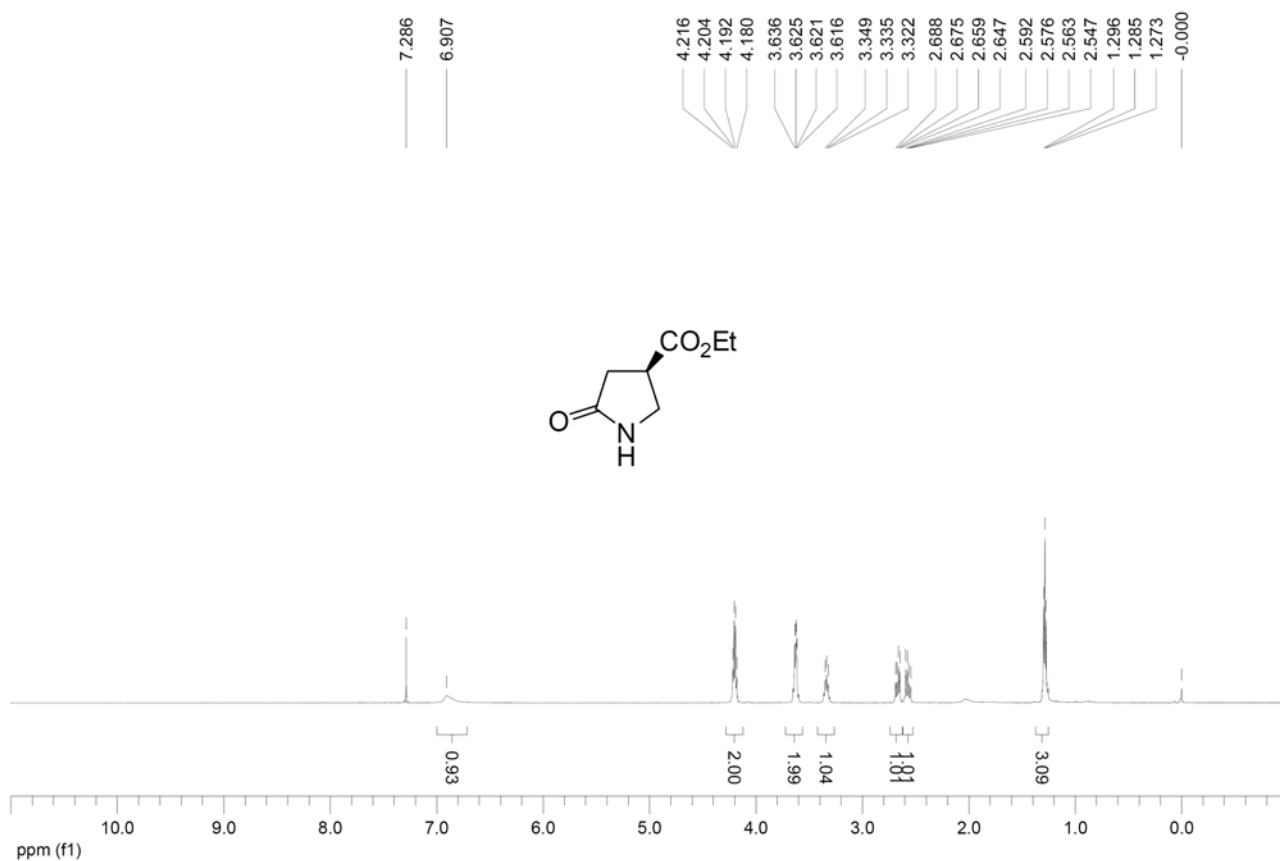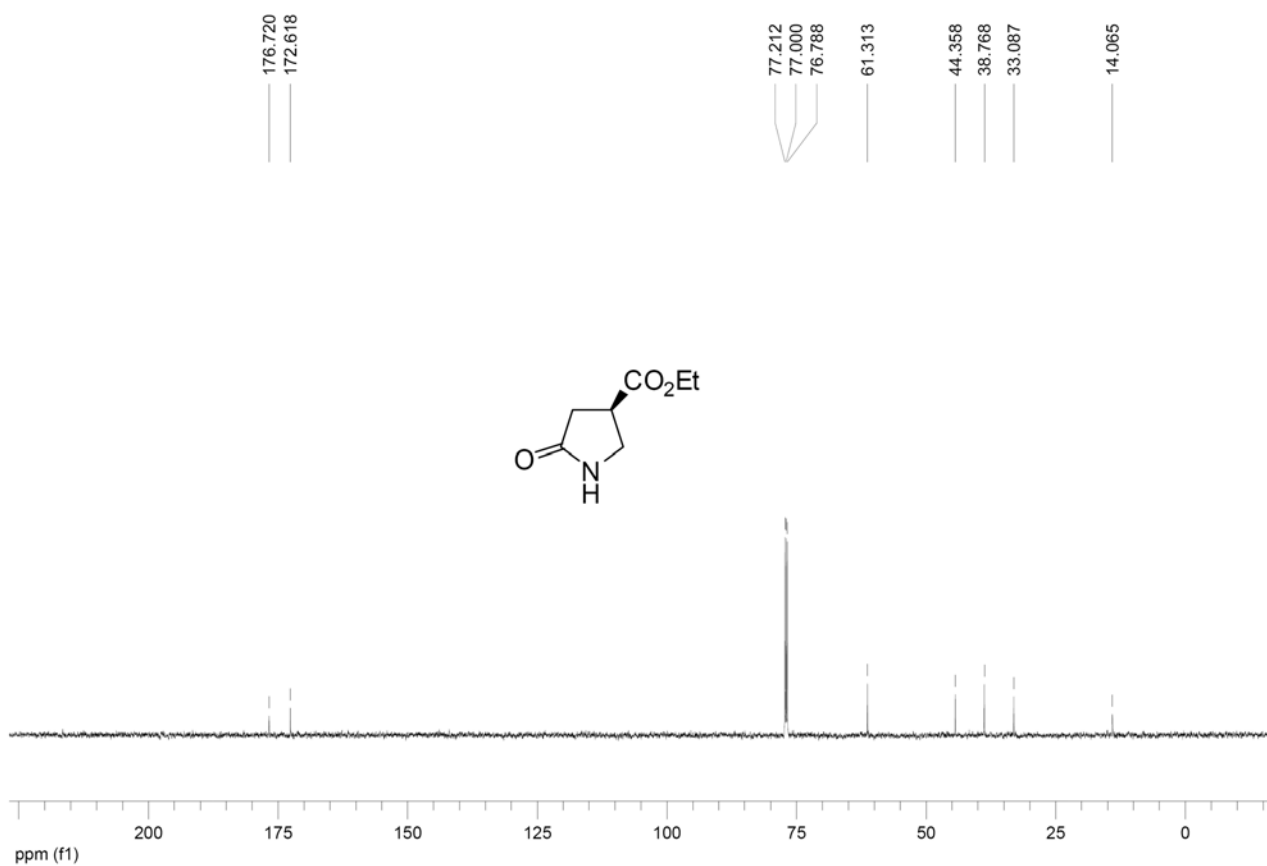

Supplement: b905033g.pdf [file b905033g.pdf]
